# Supplementary material for: The excited-state decay mechanism of 2,4-dithiothymine in the gas phase, microsolvated surroundings, and aqueous solution
Source: Royal Society of Chemistry journal article supplement (doi:10.1039/c7cp00478h), 2017-01-01
Supplement: c7cp00478h1.pdf [file c7cp00478h1.pdf]

**Supplementary Materials for “Excited-State Decay Mechanism of 2,4-Dithiothymine in Gas Phase, Microsolvated Surrounding, and Aqueous Solution”**

Bin-Bin Xie, Qian Wang, Wei-Wei Guo, and Ganglong Cui\*

E-mail: [ganglong.cui@bnu.edu.cn](mailto:ganglong.cui@bnu.edu.cn)

*Key Laboratory of Theoretical and Computational Photochemistry, Ministry of Education, College of Chemistry, Beijing Normal University, Beijing 100875, China*

**Table of Contents**

1. Active spaces of 2,4-dithiothymine used in CASSCF and CASPT2 calculations
2. Selection of microsolvated system and other computational details
3. Vertical excitation energies and adiabatic excitation energies of different snapshots in aqueous solution (QM/MM model)
4. Linearly interpolated internal coordinate paths (QM/MM model)
5. Minima and conical intersections optimized at CASSCF level of different snapshots in aqueous solution (QM/MM model)
6. Cartesian coordinates of all reported structures

# 1. Active Spaces of 2,4-dtThy in CASSCF and CASPT2 calculations

(a) gas phase

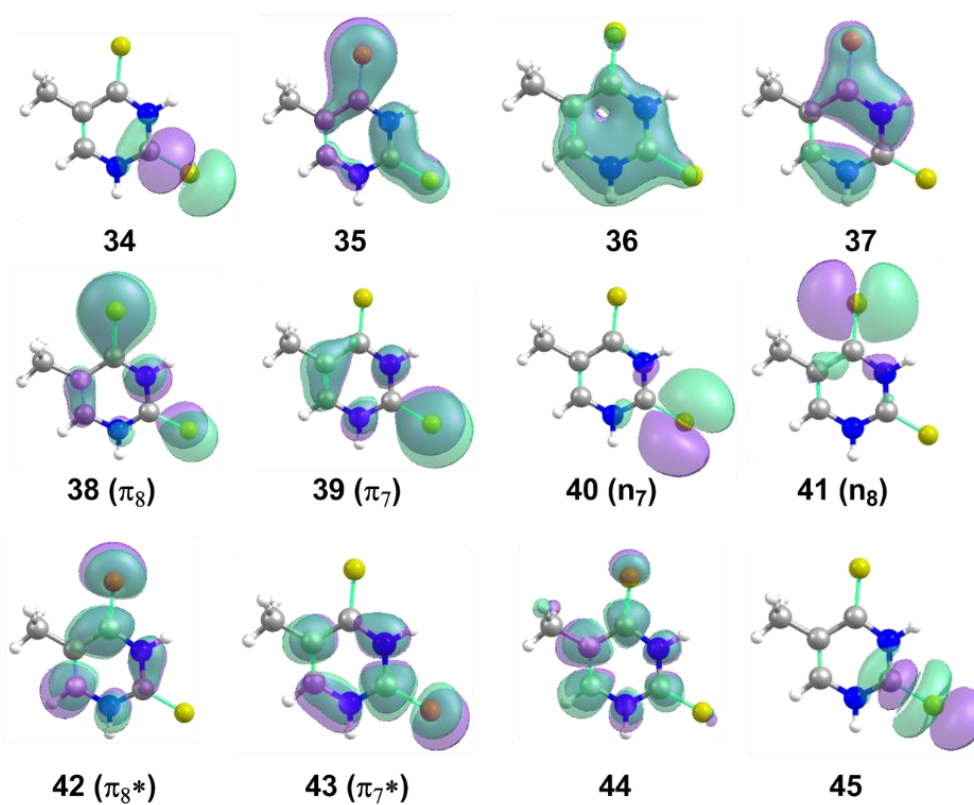

(b) microsolvated surrounding

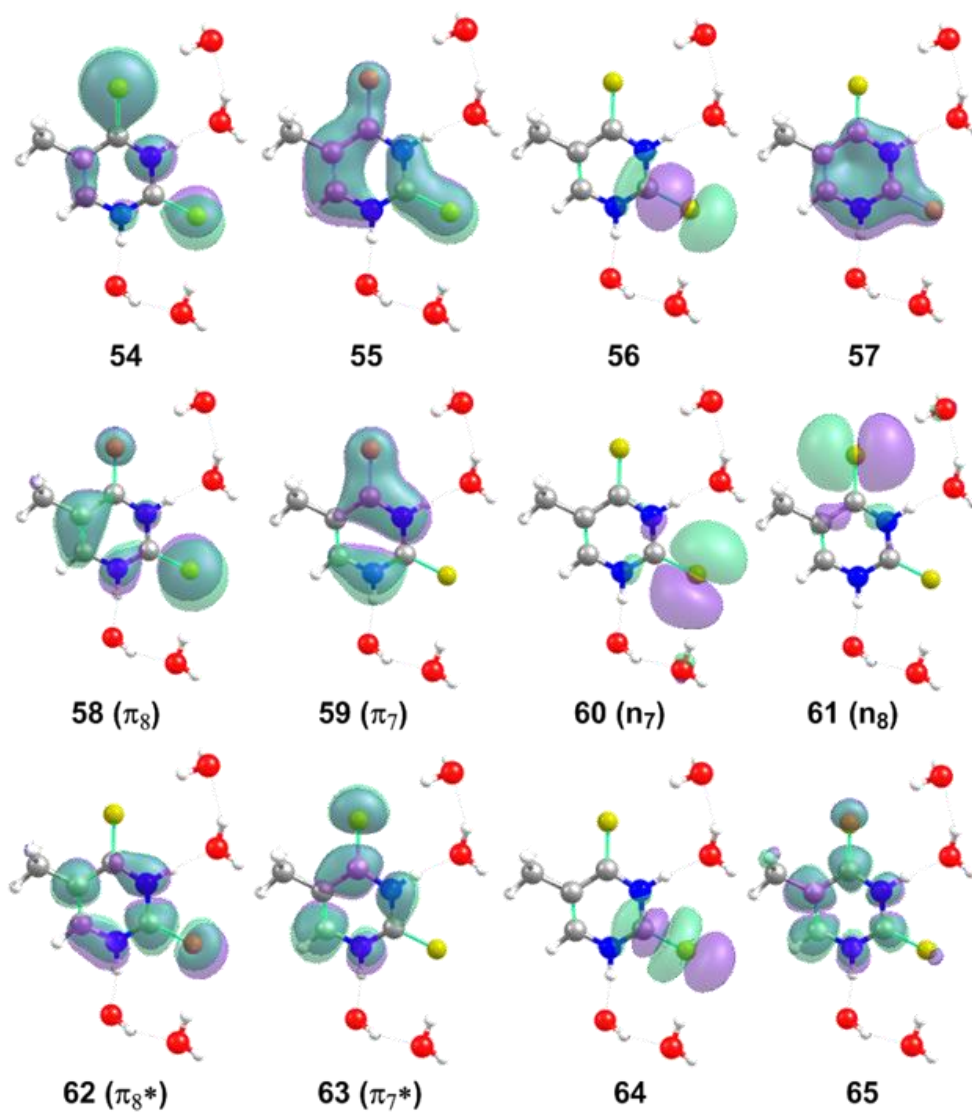

(c) aqueous solution

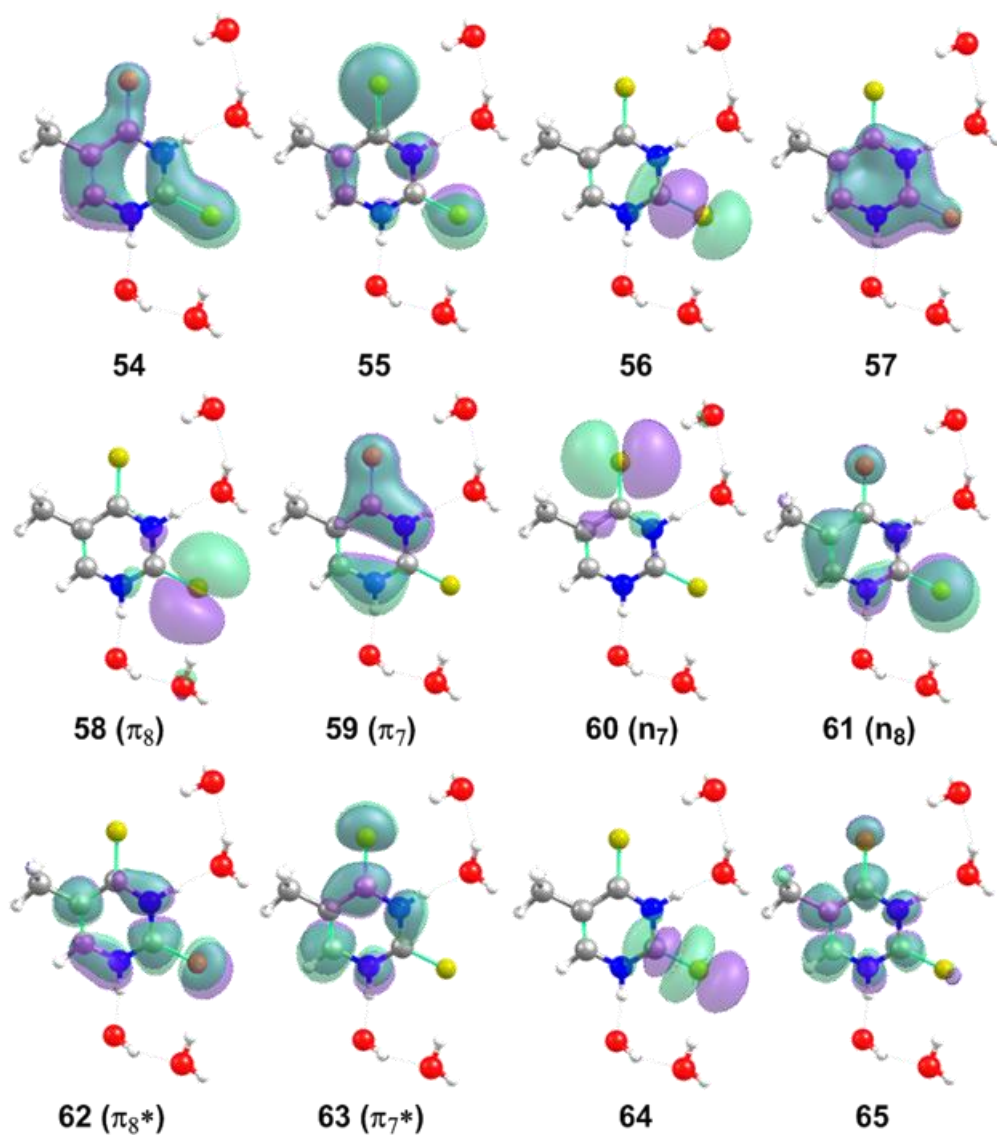

**Figure S1:** Active spaces of 2,4-dithiothymine in (a) gas phase, (b) microsolvated surrounding, and (c) aqueous solution.

## 2. Selection of microsolvated system and other computational details

In our 10 ps NVT MD simulations of aqueous 2,4-dithiothymine, we found a compact 4-water hydrogen-bond networks always around the two C=S bond. Thus, we adopted this minimally microsolvated model.

This situation is different from 7-water hydrogen-bonded network used in 4-thiothymine system recently by Martínez-Fernández et al. (ref. 47). This can be understandable. In terms of our previous QM/MM work on 4-thiothymidine, ref. 46, it is easily found that the hydrogen-bonding interaction is much stronger between the C=O group and water molecules than that between the C=S group and water molecules. Thus, more waters cluster around the C=O group and less waters around the C=S group. This has been observed in recent QM/MM work of Martínez-Fernández and coworkers (see Fig. S3 in their work). In 2,4-dithiothymine system, there is no C=O group, only the C=S groups; thus, the total number of water molecules that are compactly hydrogen-bonded with the two C=S groups is reduced, as observed in our 10 ps MD simulations.

All two-state minimum-energy conical intersections in Figs. 9-11 are directly optimized at CASSCF level using the penalty-function based method. Their single-point energies are refined by MS-CASPT2 method. Of course, at CASSCF level, they are truly degenerate points; but, at MS-CASPT2 level, a reasonably small energy gap, ca. 2-3 kcal/mol, turns out, as shown in Table 3. In addition, we have also identified some three- and four-state degenerate points based on MS-CASPT2 computed LIIC paths (Figs. S1-S6). The latter ones are not directly optimized.

### 3. Vertical excitation energies and adiabatic excitation energies of different snapshots in aqueous solution (QM/MM model)

**Table S1:** MS-CASPT2 computed vertical excitation energies (kcal/mol) to the lowest several excited singlet and triplet states of different snapshots in aqueous solution

| states           | snapshot1 | snapshot2 | snapshot3 |
|------------------|-----------|-----------|-----------|
| $^1n_8\pi_8^*$   | 71.5      | 71.1      | 70.5      |
| $^1\pi_7\pi_8^*$ | 85.6      | 83.6      | 82.9      |
| $^1n_7\pi_7^*$   | 90.4      | 88.9      | 88.2      |
| $^3\pi_8\pi_8^*$ | 64.3      | 63.0      | 63.6      |
| $^3n_8\pi_8^*$   | 70.1      | 69.6      | 69.0      |
| $^3\pi_7\pi_7^*$ | 76.1      | 75.1      | 74.9      |

**Table S2:** QM(MS-CASPT2)/MM computed single-point energies (kcal/mol) of all optimized excited-state minima relative to their  $S_0$  minima of different snapshots in aqueous solution

| states           | snapshot1 | snapshot2 | snapshot3 |
|------------------|-----------|-----------|-----------|
| $^1n_8\pi_8^*$   | 64.1      | 65.5      | 65.1      |
| $^1\pi_7\pi_8^*$ | 76.6      | 73.0      | 75.9      |
| $^1n_7\pi_7^*$   | 80.9      | 81.2      | 81.5      |
| $^3\pi_8\pi_8^*$ | 60.3      | 57.6      | 58.4      |
| $^3n_8\pi_8^*$   | 63.4      | 61.0      | 62.6      |
| $^3\pi_7\pi_7^*$ | 70.1      | 71.5      | 69.4      |

**Table S3:** Relative energies (in kcal/mol) of minimum energy conical intersections of different snapshots in aqueous solution (QM(CASPT2)/MM). The energy reference points are their corresponding  $S_0$  minima.

|                               | snapshot1 | snapshot2 | snapshot3 |
|-------------------------------|-----------|-----------|-----------|
| $^1\pi_7\pi_8^*/^1n_8\pi_8^*$ | 78.8/76.3 | 72.9/79.3 | 75.9/78.4 |
| $^1n_8\pi_8^*/^1n_7\pi_7^*$   | 83.8/80.8 | 79.6/81.6 | 82.1/84.9 |
| $^1\pi_7\pi_8^*/^1n_7\pi_7^*$ | 84.0/81.8 | 80.0/84.1 | 83.2/84.4 |
| $^3n_8\pi_8^*/^3\pi_8\pi_8^*$ | 63.4/62.8 | 62.2/65.4 | 60.2/63.1 |
| $^3n_8\pi_8^*/^3\pi_7\pi_7^*$ | 73.2/70.2 | 72.4/74.4 | 70.8/74.4 |

#### 4. Linearly interpolated internal coordinate paths (QM/MM model)

gas phase

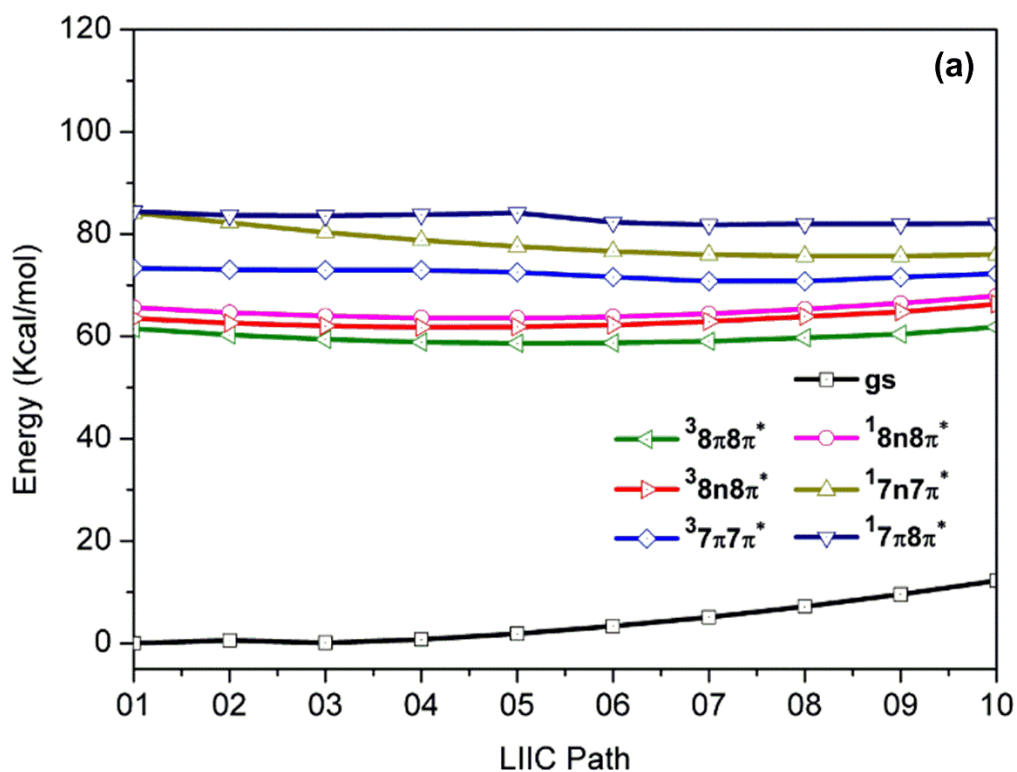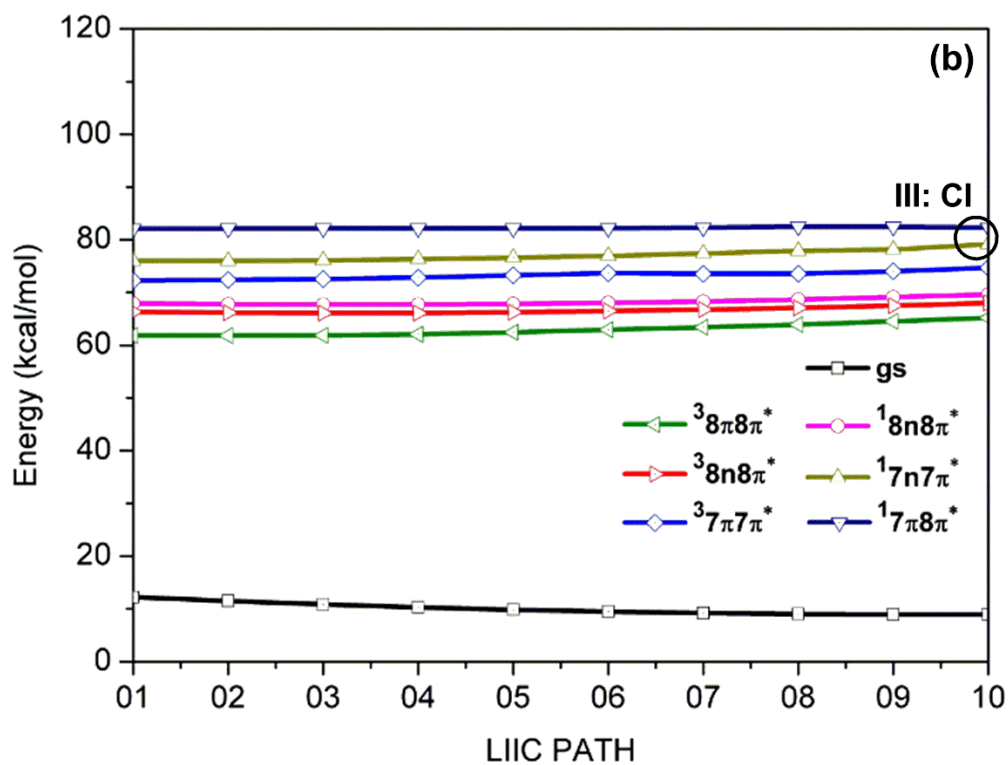

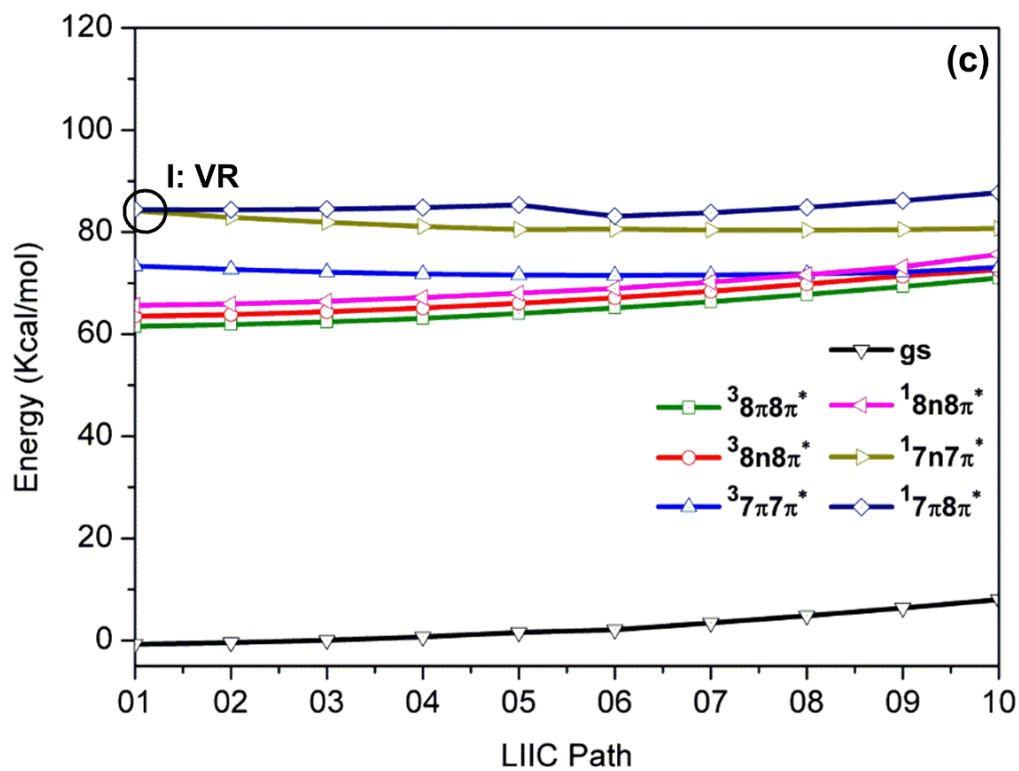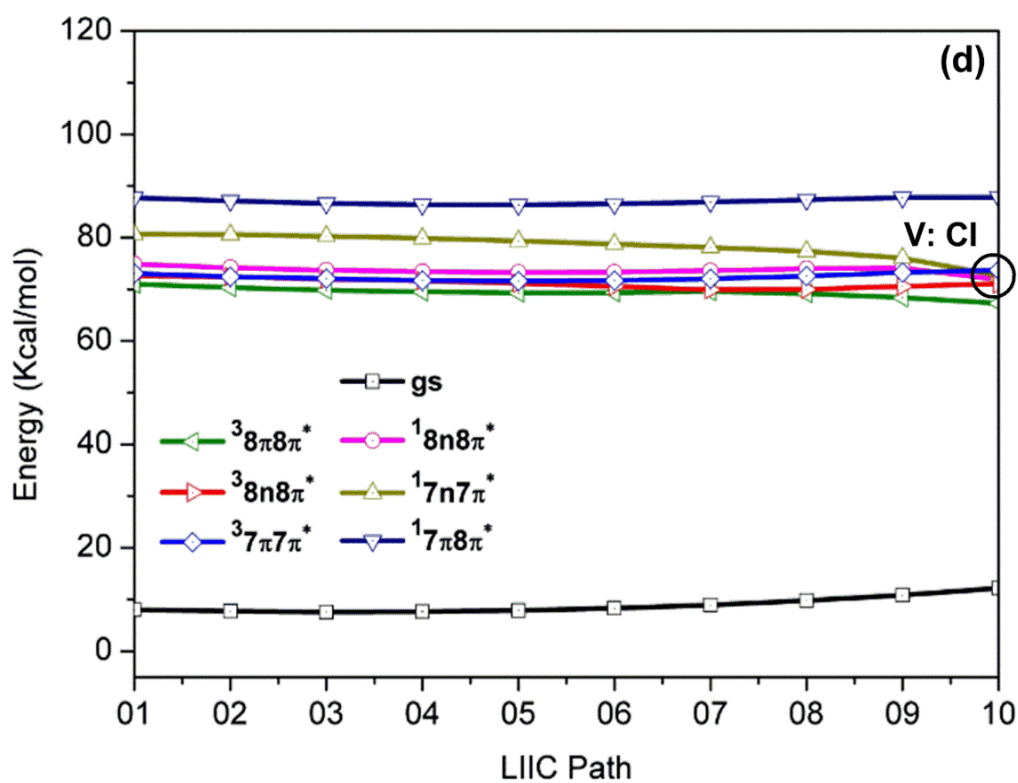

**Figure S2:** MS-CASPT2(16,12)/6-31G\* computed LIIC paths of 2,4-dithiothymine in gas phase connecting (a) the Franck-Condon point to minimum ( $^1\pi7\pi8^*$ )<sub>g</sub>; (b) minimum ( $^1\pi7\pi8^*$ )<sub>g</sub> to the conical intersection ( $^1n7\pi7^*/^1\pi7\pi8^*$ )<sub>g</sub>; (c) the Franck-Condon point to minimum ( $^1n7\pi7^*$ )<sub>g</sub>; (d) minimum ( $^1n7\pi7^*$ )<sub>g</sub> to the conical intersection ( $^1n8\pi8^*/^1n7\pi7^*$ )<sub>g</sub>.



microsolvated surrounding

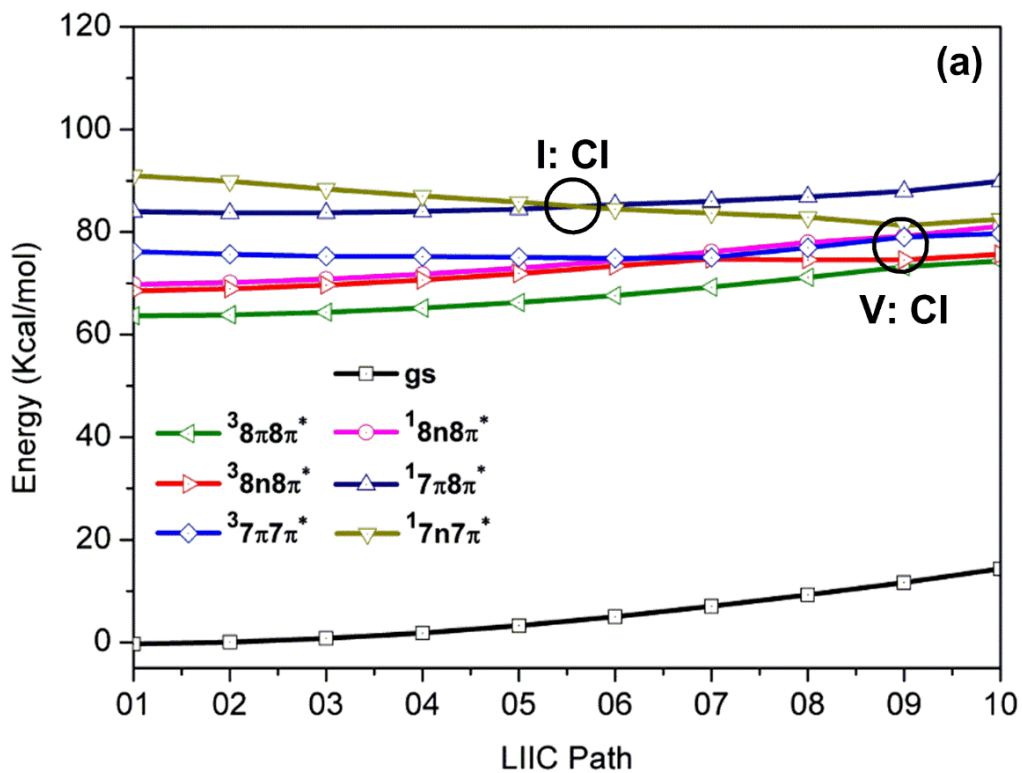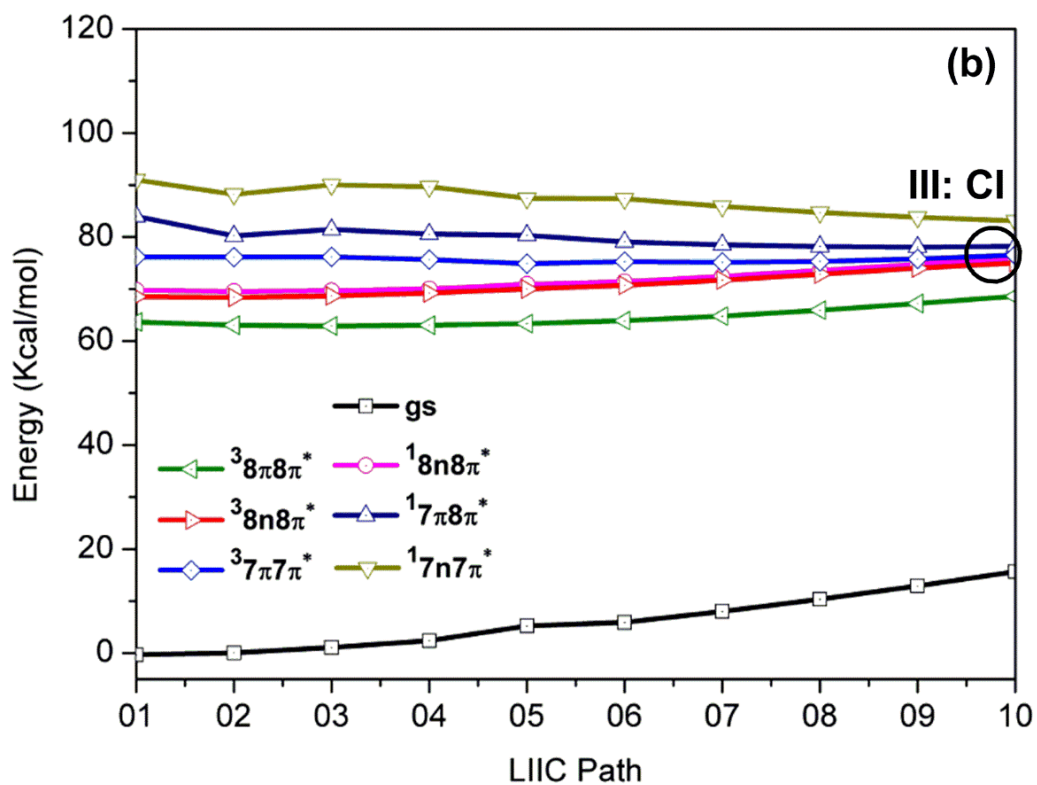

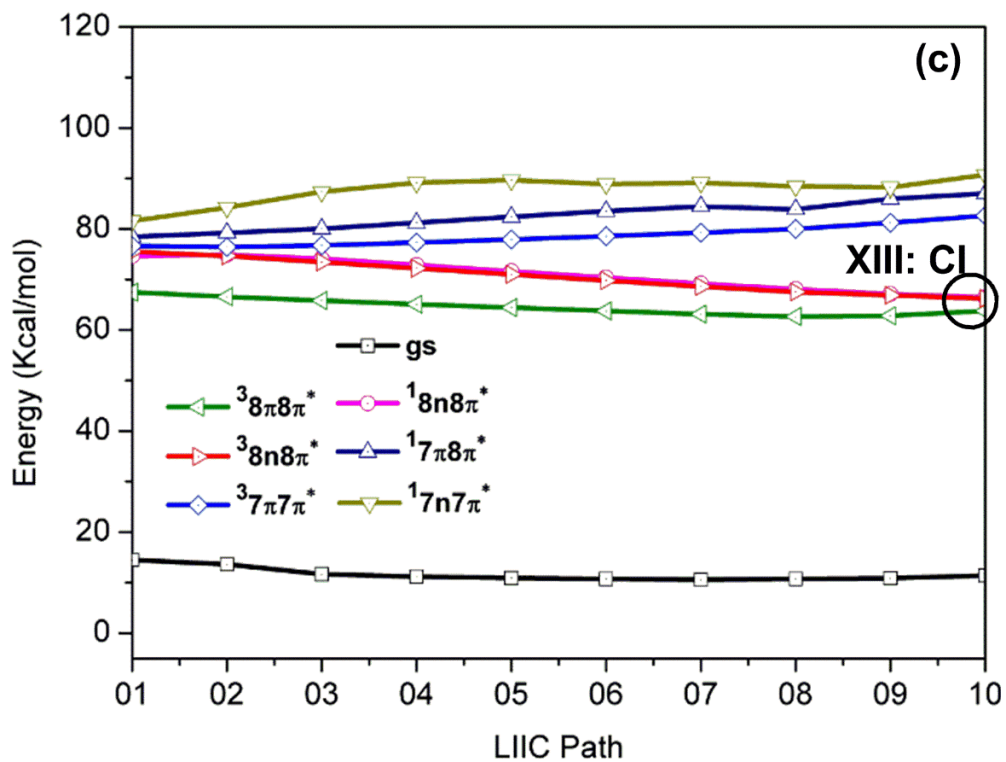

**Figure S3:** MS-CASPT2(16,12)/6-31G\* computed LIIC paths of 2,4-dithiothymine in micro-solvated surrounding connecting (a) the Franck-Condon point to minimum ( $^1n7\pi7^*$ )<sub>m</sub>; (b) the Franck-Condon point to minimum ( $^1\pi7\pi8^*$ )<sub>m</sub>; (c) minimum ( $^1\pi7\pi8^*$ )<sub>m</sub> to minimum ( $^1n8\pi8^*$ )<sub>m</sub>.

aqueous solution

snapshot1

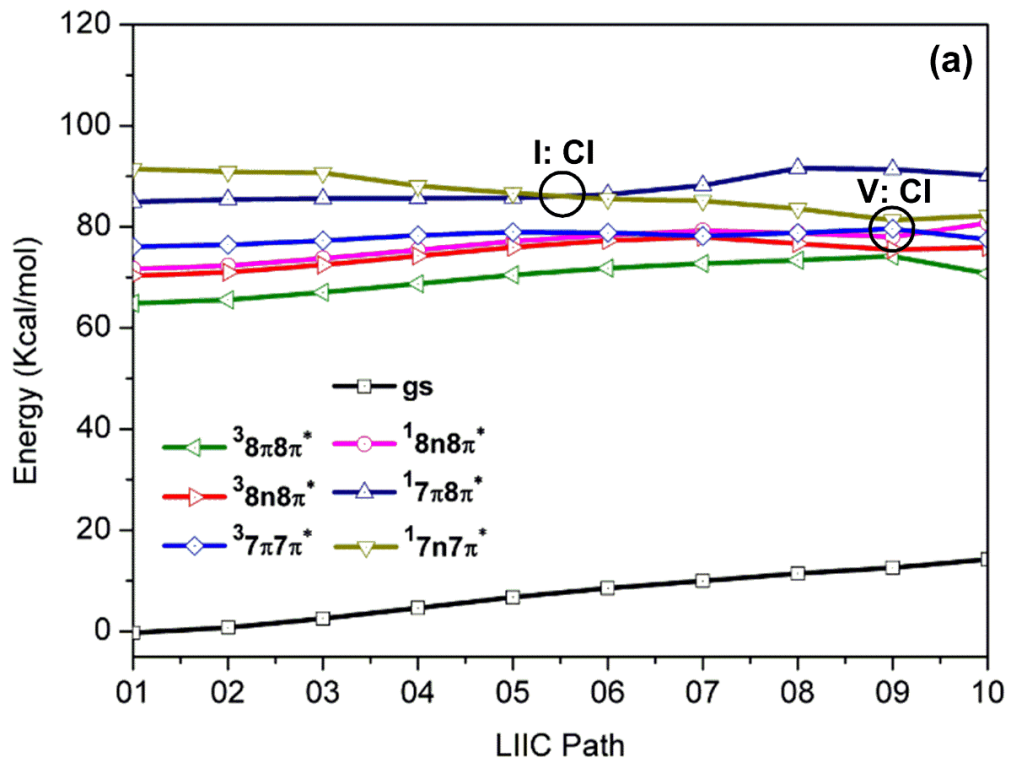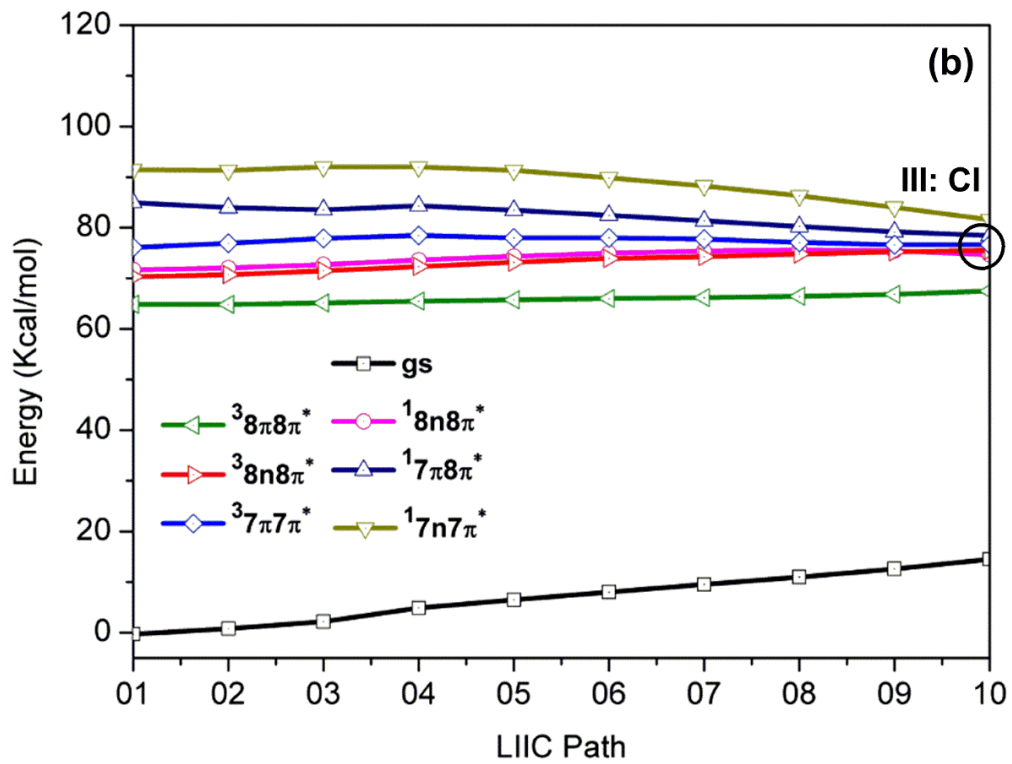

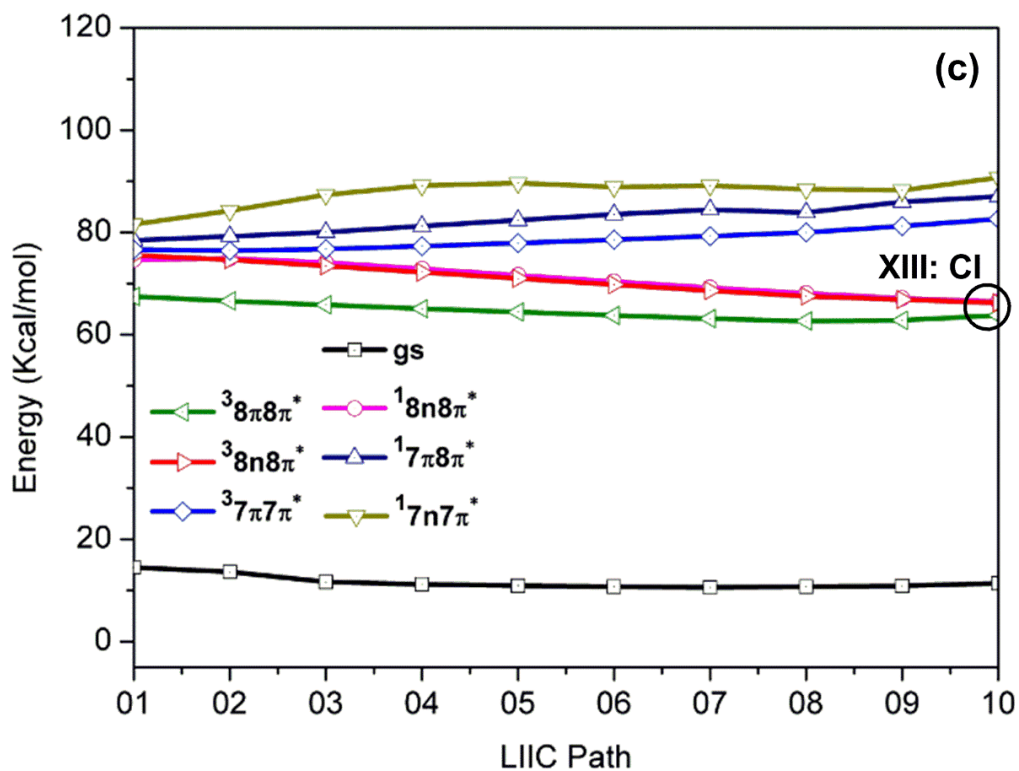

**Figure S4:** MS-CASPT2(16,12)/6-31G\* computed LIIC paths of 2,4-dithiothymine in aqueous solution connecting (a) the Franck-Condon point to minimum ( $1n7\pi7^*$ )<sub>w</sub>; (b) the Franck-Condon point to minimum ( $1\pi7\pi8^*$ )<sub>w</sub>; (c) minimum ( $1\pi7\pi8^*$ )<sub>w</sub> to minimum ( $1n8\pi8^*$ )<sub>w</sub>.

### snapshot2

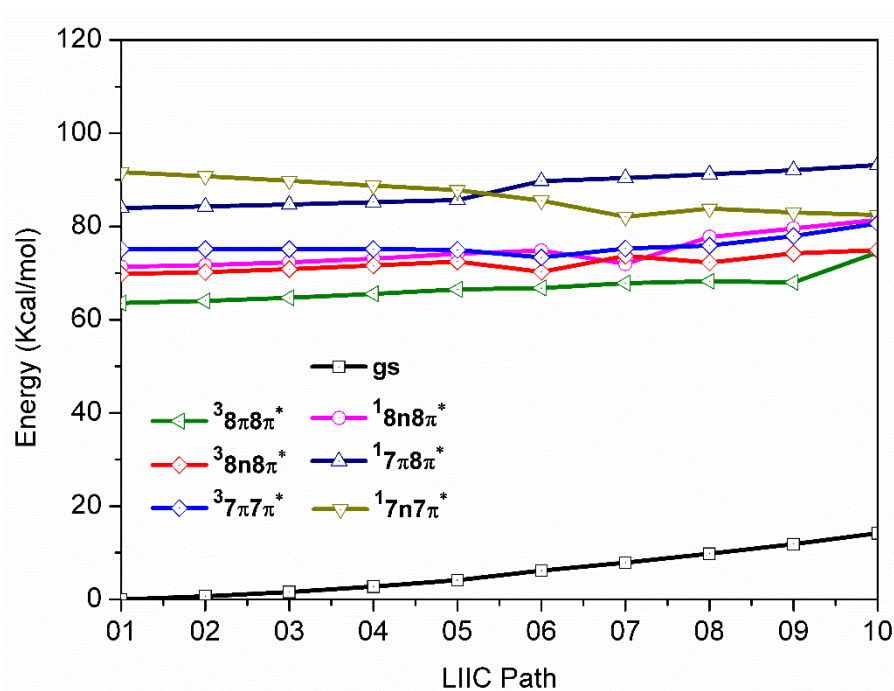

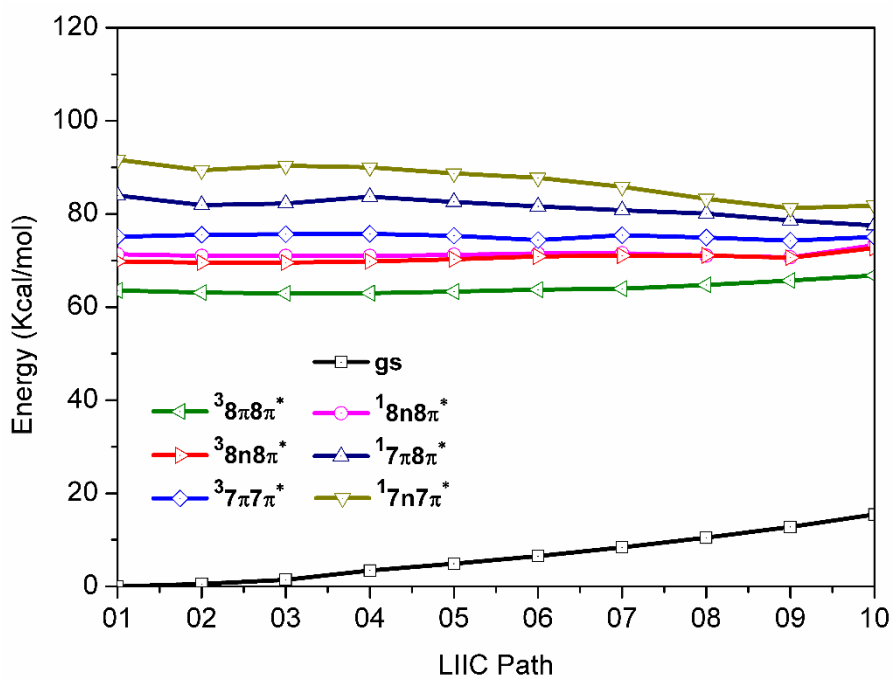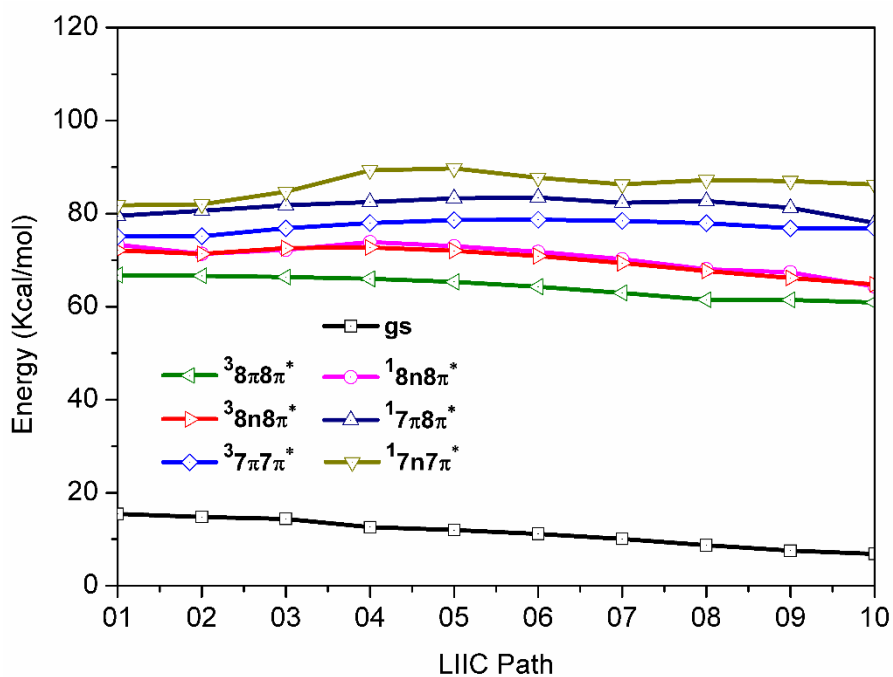

**Figure S5:** MS-CASPT2(16,12)/6-31G\* computed LIIC paths of 2,4-dithiothymine in aqueous solution connecting (a) the Franck-Condon point to minimum ( $^1n_7\pi_7^*$ )<sub>w</sub>; (b) the Franck-Condon point to minimum ( $^1\pi_7\pi_8^*$ )<sub>w</sub>; (c) minimum ( $^1\pi_7\pi_8^*$ )<sub>w</sub> to minimum ( $^1n_8\pi_8^*$ )<sub>w</sub>.

### snapshot3

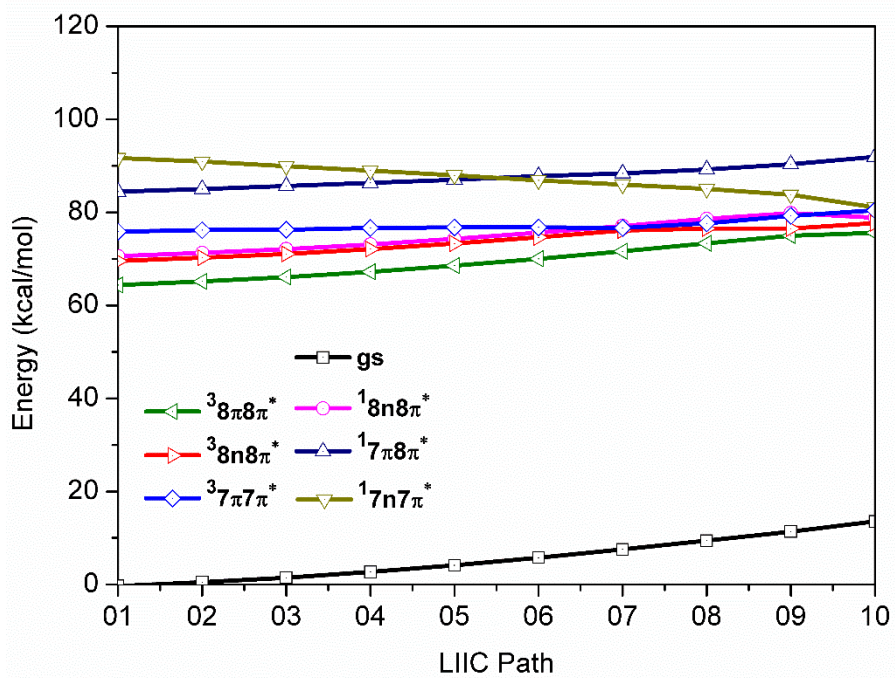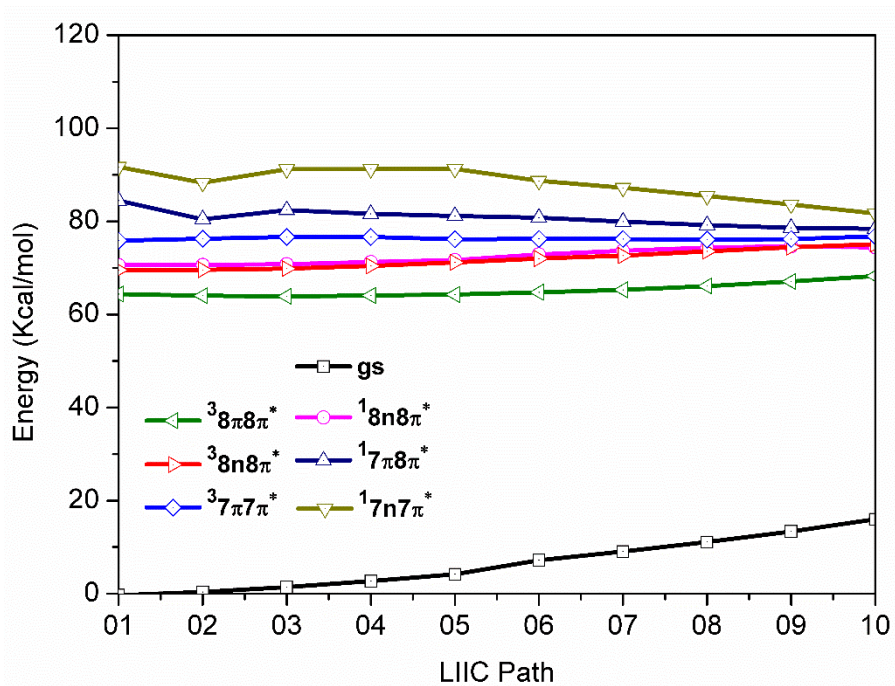

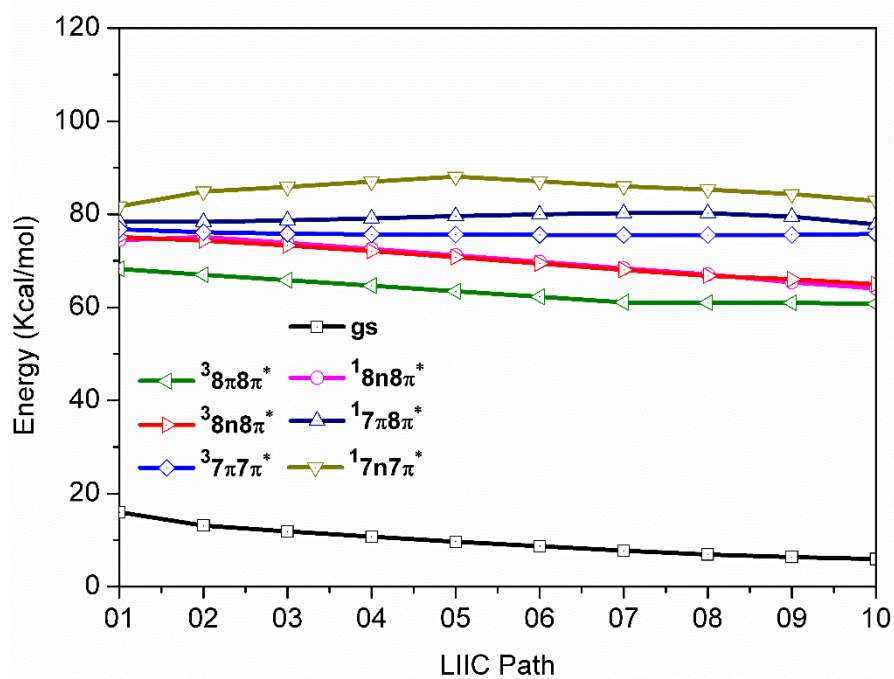

**Figure S6:** MS-CASPT2(16,12)/6-31G\* computed LIIC paths of 2,4-dithiothymine in aqueous solution connecting (a) the Franck-Condon point to minimum ( $^1n_7\pi_7^*$ )<sub>w</sub>; (b) the Franck-Condon point to minimum ( $^1\pi_7\pi_8^*$ )<sub>w</sub>; (c) minimum ( $^1\pi_7\pi_8^*$ )<sub>w</sub> to minimum ( $^1n_8\pi_8^*$ )<sub>w</sub>.

## 5. Minima and conical intersections optimized at CASSCF level of different snapshots in aqueous solution (QM/MM model)

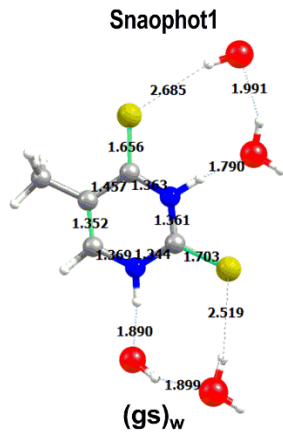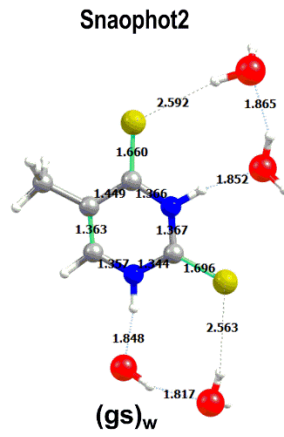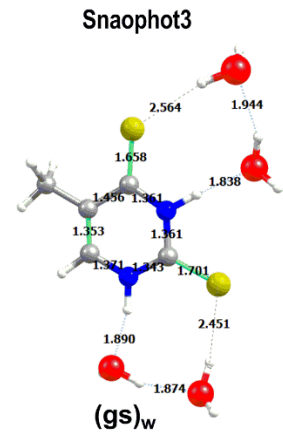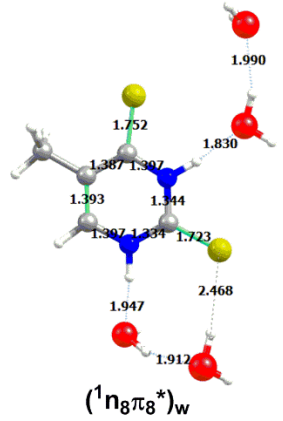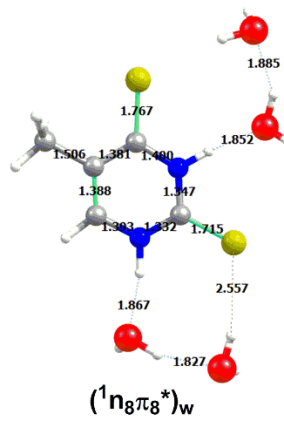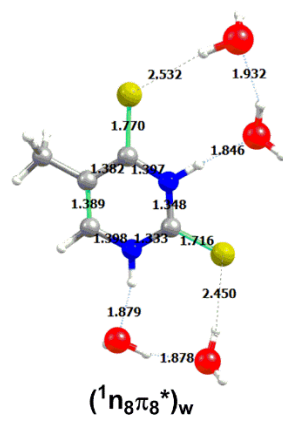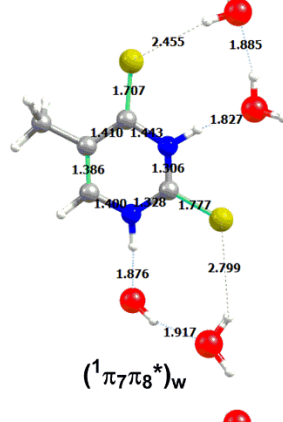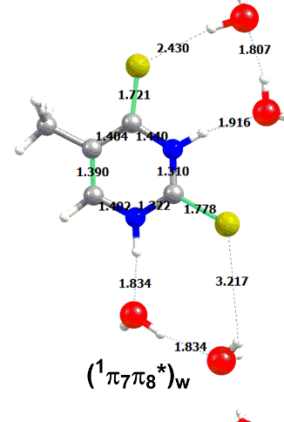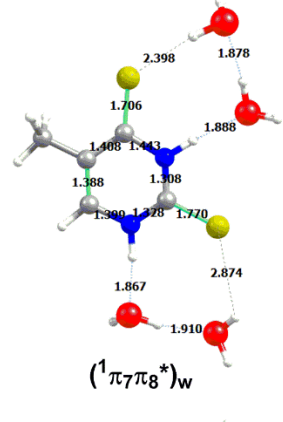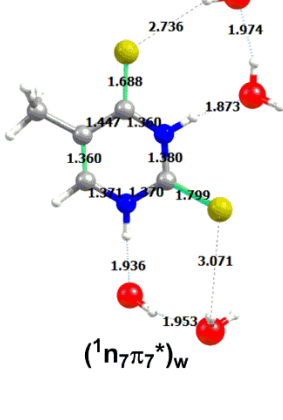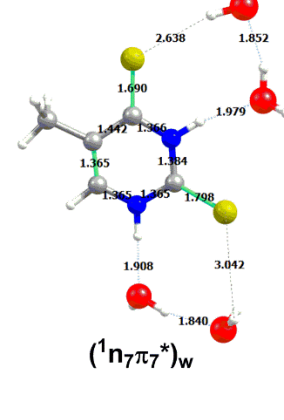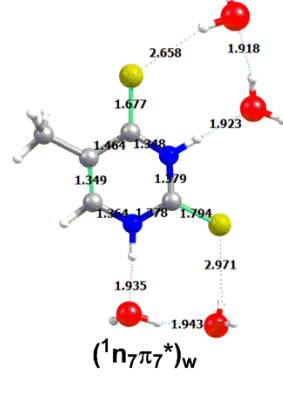



Snaophot1

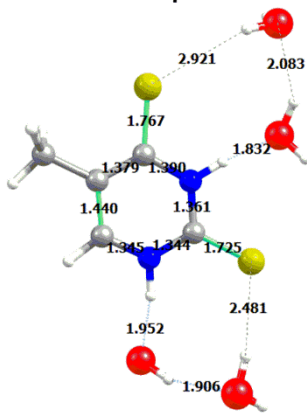 $(^3\pi_8\pi_8^*)_w$ 

Snaophot2

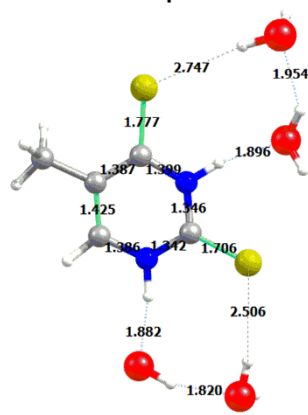 $(^3\pi_8\pi_8^*)_w$ 

Snaophot3

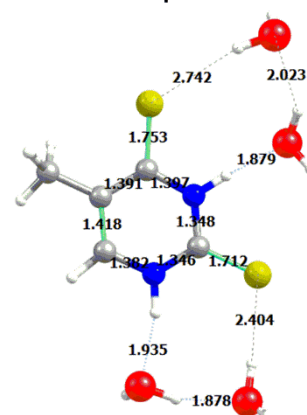 $(^3\pi_8\pi_8^*)_w$ 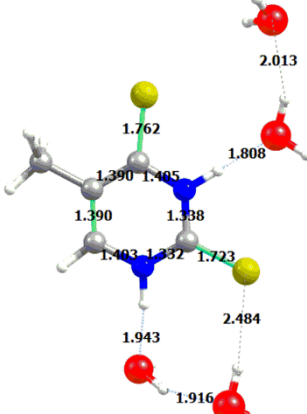 $(^3n_8\pi_8^*)_w$ 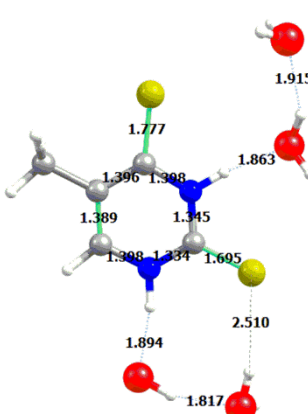 $(^3n_8\pi_8^*)_w$ 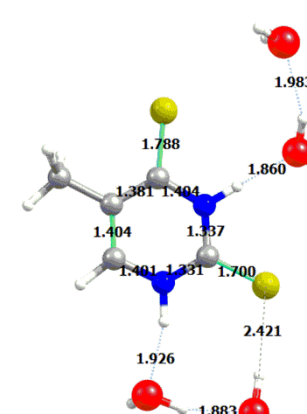 $(^3n_8\pi_8^*)_w$ 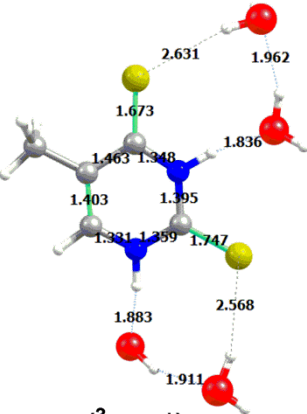 $(^3\pi_7\pi_7^*)_w$ 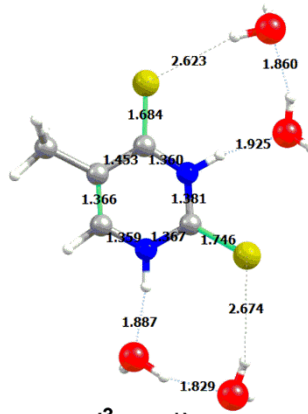 $(^3\pi_7\pi_7^*)_w$ 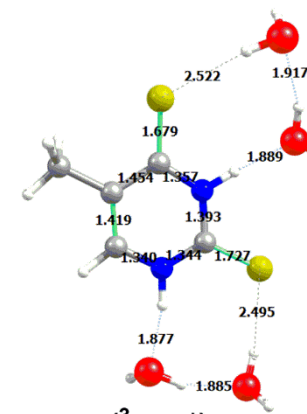 $(^3\pi_7\pi_7^*)_w$ 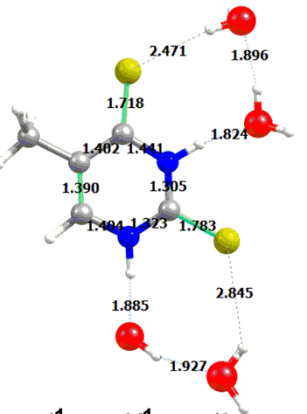 $(^1\pi_7\pi_8^*/^1n_8\pi_8^*)_w$ 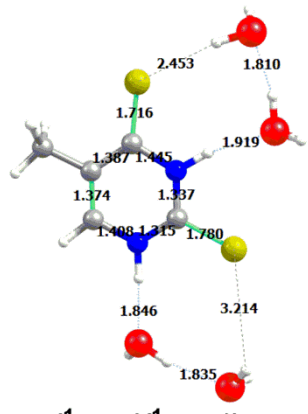 $(^1\pi_7\pi_8^*/^1n_8\pi_8^*)_w$ 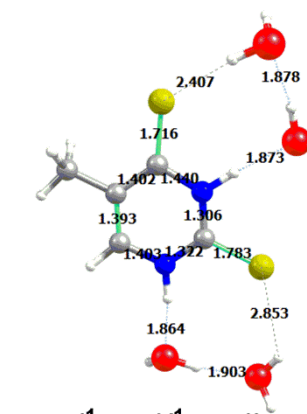 $(^1\pi_7\pi_8^*/^1n_8\pi_8^*)_w$

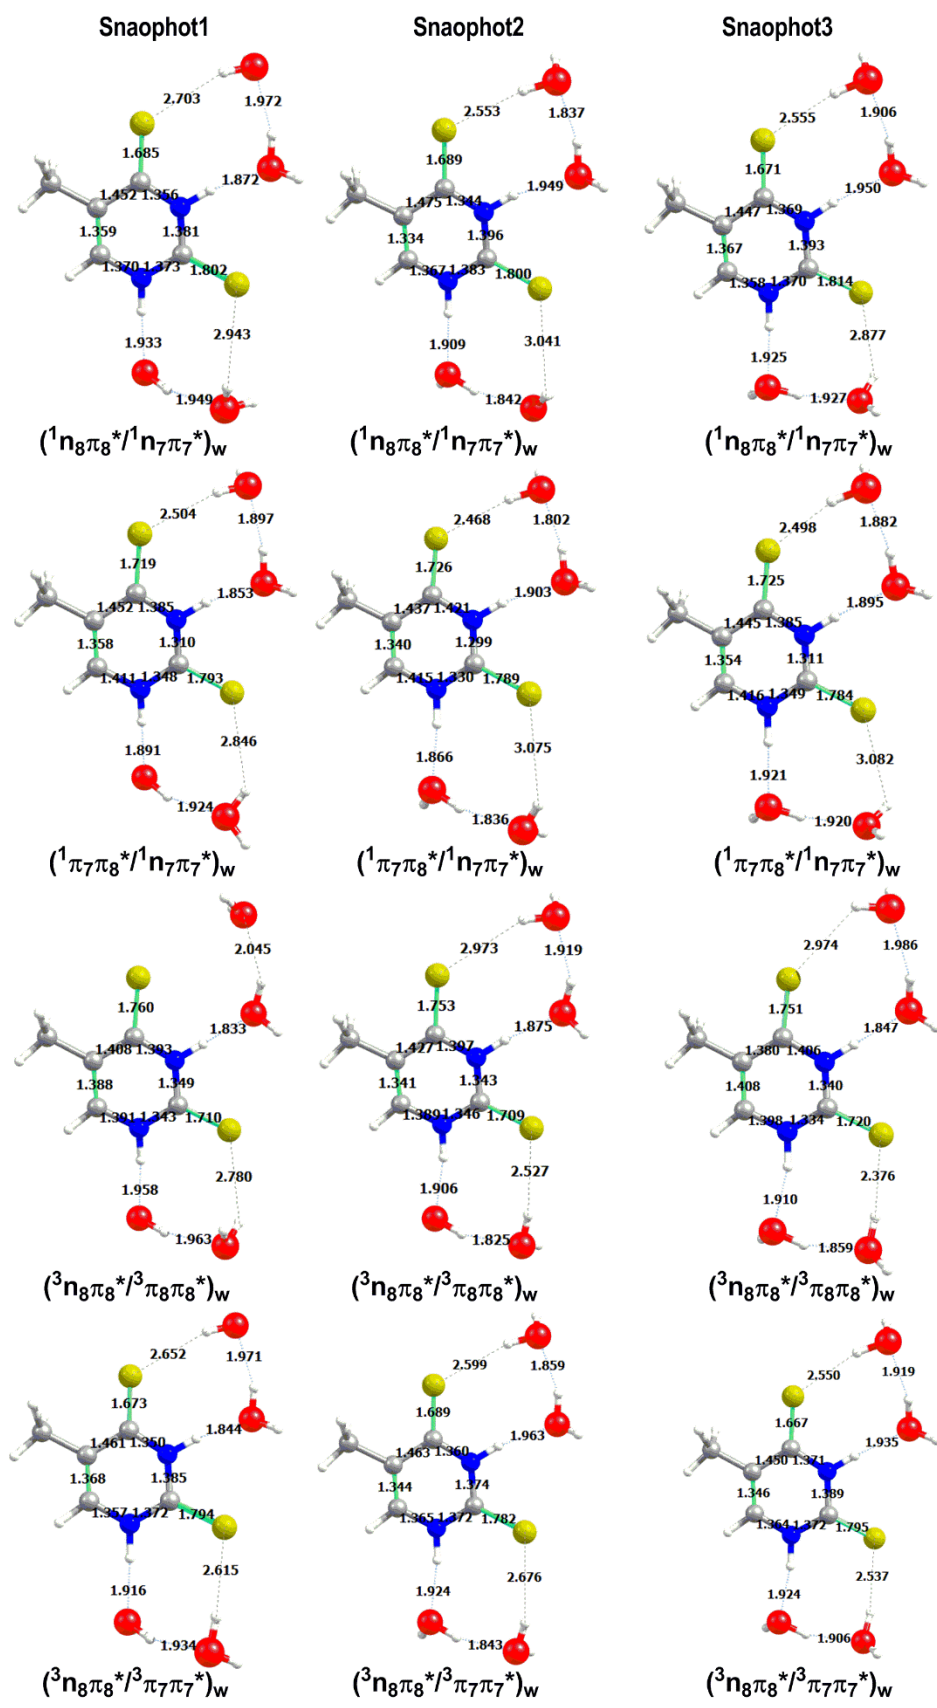

Figure S7: Minima and conical intersections optimized at CASSCF level of different snapshots in aqueous solution

## 6. Cartesian coordinates of all reported structures

### Cartesian coordinates of optimized minimum structures

#### I. gas phase

gs

|   |             |             |             |
|---|-------------|-------------|-------------|
| C | -0.62381240 | -1.40786975 | 0.00333213  |
| C | -1.03407674 | -0.00169719 | 0.01376184  |
| C | 1.34066278  | 0.64641257  | 0.01435211  |
| C | 0.69925072  | -1.67006952 | -0.00152393 |
| H | 1.09030081  | -2.66794996 | -0.00943762 |
| N | -0.00100328 | 0.89922249  | 0.01953390  |
| H | -0.25133154 | 1.86611524  | 0.02629325  |
| N | 1.65147165  | -0.67134968 | 0.00283579  |
| H | 2.61989942  | -0.89914426 | 0.00017224  |
| S | -2.59680793 | 0.52130500  | 0.01885195  |
| S | 2.49323539  | 1.87098403  | 0.02170996  |
| C | -1.65159221 | -2.50704426 | -0.00156743 |
| H | -2.28652295 | -2.44836972 | 0.87402792  |
| H | -2.29224002 | -2.43538310 | -0.87197784 |
| H | -1.16564770 | -3.47577691 | -0.01036426 |

$^1n_8\pi_8^*$

|   |             |             |             |
|---|-------------|-------------|-------------|
| C | -0.63839149 | -1.40236250 | 0.00837063  |
| C | -0.99801675 | -0.06043941 | 0.02977822  |
| C | 1.33465439  | 0.64882750  | 0.02596324  |
| C | 0.72396639  | -1.69960907 | -0.00509810 |
| H | 1.12231142  | -2.69091437 | -0.02151829 |
| N | 0.00516490  | 0.92037108  | 0.03743799  |
| H | -0.22559403 | 1.88715879  | 0.05521656  |

|   |             |             |             |
|---|-------------|-------------|-------------|
| N | 1.65412231  | -0.65781518 | 0.00323520  |
| H | 2.62729709  | -0.86251680 | -0.00152743 |
| S | -2.64523389 | 0.54363065  | 0.04589797  |
| S | 2.49963908  | 1.87746803  | 0.03914657  |
| C | -1.66879096 | -2.50400069 | -0.00214647 |
| H | -2.30418458 | -2.46255386 | 0.87727332  |
| H | -2.30654106 | -2.44341197 | -0.87877513 |
| H | -1.18861680 | -3.47444719 | -0.01325426 |

${}^1\Pi_7\Pi_8^*$

|   |             |             |             |
|---|-------------|-------------|-------------|
| N | 0.12110662  | -0.04596850 | 1.28204126  |
| C | 0.17350649  | -0.03296606 | -0.04294636 |
| N | 1.32601503  | -0.01305971 | -0.64765914 |
| C | 2.61974676  | -0.00496086 | 0.00971631  |
| C | 2.53113718  | -0.01976488 | 1.41244788  |
| C | 1.30201851  | -0.03814909 | 2.05927140  |
| S | -1.35415764 | -0.04392644 | -0.96878378 |
| H | -0.77188415 | -0.06427831 | 1.72062528  |
| H | 1.36252616  | -0.00247158 | -1.64716663 |
| H | 1.15724592  | -0.05062148 | 3.11716794  |
| C | 3.79584215  | -0.01254120 | 2.22712168  |
| H | 3.57798361  | -0.02812233 | 3.28960836  |
| H | 4.40614986  | -0.87269752 | 1.98015719  |
| H | 4.38270089  | 0.86945895  | 2.00102636  |
| S | 3.95825332  | 0.01617781  | -1.03987017 |

${}^1\Pi_7\Pi_7^*$

|   |             |             |            |
|---|-------------|-------------|------------|
| C | -0.61852472 | -1.39974668 | 0.00354272 |
| C | -1.04014063 | 0.01656360  | 0.01437747 |
| C | 1.32667408  | 0.63447005  | 0.01424346 |

|   |             |             |             |
|---|-------------|-------------|-------------|
| C | 0.70629538  | -1.67407583 | -0.00186397 |
| H | 1.07492973  | -2.68151772 | -0.01008161 |
| N | -0.03609131 | 0.92206811  | 0.01964491  |
| H | -0.31778391 | 1.87762912  | 0.02538087  |
| N | 1.67903456  | -0.70795961 | 0.00211566  |
| H | 2.63537059  | -0.96901652 | 0.00023330  |
| S | -2.62005056 | 0.51146674  | 0.01985520  |
| S | 2.57501622  | 1.94613377  | 0.02260998  |
| C | -1.64581314 | -2.50090700 | -0.00154123 |
| H | -2.28334356 | -2.44977270 | 0.87307390  |
| H | -2.28817735 | -2.43728620 | -0.87177071 |
| H | -1.15560939 | -3.46866416 | -0.00981993 |

${}^3\Pi_g\Pi_g^*$

|   |             |             |             |
|---|-------------|-------------|-------------|
| C | -0.65758969 | -1.38982055 | 0.00000549  |
| C | -1.00321312 | -0.04725365 | 0.00001836  |
| C | 1.34016617  | 0.65618261  | -0.00000278 |
| C | 0.72482941  | -1.69694248 | -0.00001128 |
| H | 1.11662508  | -2.69074524 | -0.00001756 |
| N | 0.01291034  | 0.92337459  | 0.00001331  |
| H | -0.23868497 | 1.88589607  | 0.00002150  |
| N | 1.65080493  | -0.66215341 | -0.00001460 |
| H | 2.62350355  | -0.87096767 | -0.00002511 |
| S | -2.64834696 | 0.56737250  | 0.00003489  |
| S | 2.51402819  | 1.86920162  | -0.00000638 |
| C | -1.66875449 | -2.51149005 | -0.00000207 |
| H | -2.30605758 | -2.47201866 | 0.87509611  |
| H | -2.30592420 | -2.47212388 | -0.87520364 |
| H | -1.16251063 | -3.46912680 | 0.00009377  |

${}^3n_8\pi_8^*$ 

|   |             |             |             |
|---|-------------|-------------|-------------|
| C | -0.07696304 | -0.91097517 | -0.16621250 |
| C | -0.98515585 | 0.15911650  | -0.15331839 |
| C | 0.81027209  | 1.79309084  | 0.11411625  |
| C | 1.26531485  | -0.59092920 | -0.03775953 |
| H | -1.12677698 | 2.24506480  | -0.00313295 |
| N | 1.65838726  | 0.74208091  | 0.09746035  |
| H | 2.05170902  | -1.31541065 | -0.03504163 |
| N | -0.50310029 | 1.47077945  | -0.01115242 |
| H | 2.62250118  | 0.96648029  | 0.18862982  |
| S | -2.73367283 | -0.01308598 | -0.28965925 |
| S | 1.32828770  | 3.39156596  | 0.27755386  |
| C | -0.52843929 | -2.34341402 | -0.31169334 |
| H | -1.18280083 | -2.64050314 | 0.50213868  |
| H | -1.06069065 | -2.50158048 | -1.24465069 |
| H | 0.32412609  | -3.01103291 | -0.30528938 |

 ${}^3\pi_7\pi_7^*$ 

|   |             |             |             |
|---|-------------|-------------|-------------|
| C | -0.63075185 | -1.39166887 | 0.00000801  |
| C | -1.04974182 | 0.00850487  | 0.00000768  |
| C | 1.33024937  | 0.62666778  | -0.00000281 |
| C | 0.72836426  | -1.67497343 | -0.00000290 |
| H | 1.10541860  | -2.67768804 | -0.00000793 |
| N | -0.03566695 | 0.92134482  | 0.00000427  |
| H | -0.29357071 | 1.88351926  | 0.00000412  |
| N | 1.65437957  | -0.69643876 | -0.00000674 |
| H | 2.62235875  | -0.92834029 | -0.00001194 |
| S | -2.62738014 | 0.51774043  | 0.00001031  |
| S | 2.56090599  | 1.88541394  | 0.00000207  |
| C | -1.64587612 | -2.49988138 | 0.00000086  |

|   |             |             |             |
|---|-------------|-------------|-------------|
| H | -2.28746067 | -2.44460999 | 0.87211505  |
| H | -2.28741207 | -2.44464161 | -0.87215186 |
| H | -1.15203023 | -3.46556372 | 0.00003184  |

## II. microsolvated surrounding

gs

|   |             |             |             |
|---|-------------|-------------|-------------|
| C | -0.13678809 | -0.79704746 | -0.27973266 |
| C | -1.10701568 | 0.28470821  | -0.34850224 |
| C | 0.71827108  | 1.89134136  | -0.16996165 |
| C | 1.16455232  | -0.44844676 | -0.16077322 |
| H | -1.23736032 | 2.32535193  | -0.41209409 |
| N | 1.57241050  | 0.86241947  | -0.10516095 |
| H | 1.95859860  | -1.16499384 | -0.09451836 |
| N | -0.59024625 | 1.55000398  | -0.31204899 |
| H | 2.55901178  | 1.04988786  | -0.02213908 |
| S | -2.74773655 | 0.03663775  | -0.45584821 |
| S | 1.21469224  | 3.52241005  | -0.07782627 |
| C | -0.57003473 | -2.23751484 | -0.32932146 |
| H | -1.23282424 | -2.47333192 | 0.49431465  |
| H | -1.10438330 | -2.45170128 | -1.24688271 |
| H | 0.29382929  | -2.88962963 | -0.27358604 |
| O | -4.70795052 | 3.00919358  | 0.51072054  |
| H | -5.40741096 | 3.04288852  | -0.12869872 |
| H | -4.33283768 | 2.13838648  | 0.42922667  |
| O | 4.44359475  | 0.96836971  | 0.14997254  |
| H | 4.60321611  | 1.69953896  | 0.74837835  |
| H | 4.92016637  | 1.18016854  | -0.64167295 |
| O | 4.30196674  | 3.36316599  | 1.63367204  |
| H | 3.41866038  | 3.54348165  | 1.32132596  |
| H | 4.77593365  | 4.18093466  | 1.56605429  |

|   |             |            |             |
|---|-------------|------------|-------------|
| O | -2.25212507 | 3.86286609 | -0.65799219 |
| H | -3.08316147 | 3.85151382 | -0.18829321 |
| H | -1.71724527 | 4.55320161 | -0.28845357 |

<sup>1</sup>n<sub>8</sub>π<sub>8</sub>\*

|   |             |             |             |
|---|-------------|-------------|-------------|
| C | -0.02861400 | -1.04528600 | -0.49594900 |
| C | -0.97136400 | -0.05914300 | -0.77009700 |
| C | 0.63454900  | 1.69437900  | -0.33758300 |
| C | 1.24912800  | -0.62557100 | -0.14514100 |
| H | -1.28231300 | 2.01295200  | -0.84135300 |
| N | 1.53420000  | 0.74738000  | -0.09034800 |
| H | 2.05961500  | -1.27783700 | 0.09762200  |
| N | -0.60156300 | 1.29239900  | -0.66675300 |
| H | 2.47445500  | 1.02273700  | 0.13135100  |
| S | -2.64333000 | -0.35445600 | -1.27268200 |
| S | 1.01231600  | 3.37988200  | -0.24840100 |
| C | -0.36726100 | -2.51272100 | -0.58158900 |
| H | -1.17888300 | -2.77038500 | 0.09151200  |
| H | -0.66721300 | -2.78958800 | -1.58739600 |
| H | 0.48947200  | -3.11828700 | -0.31327600 |
| O | -4.21332400 | 4.01002100  | 1.14734400  |
| H | -5.14141000 | 3.90152300  | 0.98628700  |
| H | -4.02114300 | 3.51141400  | 1.93074600  |
| O | 4.36968100  | 1.14266500  | 0.55570000  |
| H | 4.37254000  | 1.92522200  | 1.10761800  |
| H | 4.87736900  | 1.37385500  | -0.21057400 |
| O | 3.82413200  | 3.62824000  | 1.81612100  |
| H | 2.96156200  | 3.64217300  | 1.40629800  |
| H | 4.22533300  | 4.45704800  | 1.59191800  |
| O | -2.46582800 | 3.46893700  | -1.13003300 |



|                      |             |             |             |
|----------------------|-------------|-------------|-------------|
| H                    | -3.03098300 | 3.69827800  | -0.39582300 |
| H                    | -1.75334100 | 4.09797400  | -1.11536100 |
| ${}^1\Pi_{7\Pi_8}^*$ |             |             |             |
| N                    | 1.33300164  | 0.79224674  | 0.00089963  |
| C                    | 0.48531733  | 1.79520122  | -0.16575579 |
| N                    | -0.79876071 | 1.57243786  | -0.30610240 |
| C                    | -1.38658995 | 0.25687305  | -0.29470974 |
| C                    | -0.47751773 | -0.79304653 | -0.09192691 |
| C                    | 0.87976383  | -0.53386567 | 0.05894049  |
| S                    | 1.12883426  | 3.45345046  | -0.17627310 |
| H                    | 2.32046040  | 0.97899213  | 0.07637090  |
| H                    | -1.41220817 | 2.36947664  | -0.42465107 |
| H                    | 1.63392701  | -1.27078851 | 0.22955798  |
| C                    | -0.96924057 | -2.21495926 | -0.04226094 |
| H                    | -0.14837710 | -2.90354573 | 0.12717819  |
| H                    | -1.69756060 | -2.33830318 | 0.75003193  |
| H                    | -1.46032342 | -2.47897453 | -0.97125784 |
| S                    | -3.08740344 | 0.15438257  | -0.54628909 |
| O                    | -4.91111856 | 2.90362850  | 0.23651735  |
| H                    | -5.53954040 | 2.78651019  | -0.46415228 |
| H                    | -4.46728491 | 2.05817863  | 0.30528980  |
| O                    | 4.19524185  | 0.99996102  | 0.22501336  |
| H                    | 4.56938539  | 1.75878955  | 0.66977214  |
| H                    | 4.73794219  | 0.85246722  | -0.53779664 |
| O                    | 5.25016522  | 3.40201077  | 1.39845812  |
| H                    | 4.70609644  | 4.17138367  | 1.29265490  |
| H                    | 5.63617642  | 3.46493847  | 2.26200280  |
| O                    | -2.41330676 | 3.98185810  | -0.52975995 |
| H                    | -3.32192986 | 3.72640974  | -0.35992499 |

|   |             |            |            |
|---|-------------|------------|------------|
| H | -2.22354880 | 4.68058587 | 0.08098916 |
|---|-------------|------------|------------|

<sup>1</sup>n<sub>7</sub>π<sub>7</sub>\*

|   |             |             |             |
|---|-------------|-------------|-------------|
| C | -0.14255600 | -0.82191900 | -0.14657000 |
| C | -1.08124100 | 0.27589700  | -0.15425800 |
| C | 0.76671900  | 1.82025300  | -0.51316100 |
| C | 1.17897600  | -0.52042800 | -0.30217300 |
| H | -1.21146200 | 2.30897400  | -0.36998100 |
| N | 1.62889300  | 0.76000500  | -0.45919200 |
| H | 1.94286000  | -1.27226800 | -0.31544200 |
| N | -0.57382000 | 1.53359700  | -0.31948500 |
| H | 2.61326700  | 0.92313500  | -0.56306700 |
| S | -2.74693800 | 0.05470800  | 0.02335000  |
| S | 1.37733800  | 3.47034200  | -0.13718900 |
| C | -0.60144800 | -2.24672000 | 0.02753000  |
| H | -1.11387900 | -2.38680800 | 0.97288000  |
| H | -1.28577500 | -2.54311800 | -0.75970600 |
| H | 0.24949600  | -2.91846700 | 0.00376400  |
| O | -4.90058300 | 2.96698800  | -0.05087900 |
| H | -5.36572500 | 2.77001600  | -0.85366500 |
| H | -4.54424700 | 2.13611900  | 0.24442000  |
| O | 4.52511800  | 1.22895900  | -0.43082500 |
| H | 4.64225700  | 1.71719600  | 0.38255200  |
| H | 4.95791700  | 1.73528200  | -1.10477800 |
| O | 4.30923100  | 2.86653000  | 1.93567600  |
| H | 3.37412400  | 3.03385300  | 1.91175900  |
| H | 4.71691800  | 3.69246700  | 2.15928600  |
| O | -2.25088600 | 3.97774600  | -0.43551300 |
| H | -3.18576900 | 3.79569500  | -0.35529600 |
| H | -2.06055700 | 4.66028500  | 0.19304200  |

³π₈π₈\*

|   |             |             |             |
|---|-------------|-------------|-------------|
| C | -0.39691431 | -0.81577652 | -0.34365234 |
| C | -1.26923945 | 0.24452287  | -0.52722721 |
| C | 0.53812368  | 1.84967120  | -0.33193693 |
| C | 0.96015768  | -0.51320907 | -0.14479072 |
| H | -1.38406264 | 2.33374825  | -0.66415606 |
| N | 1.36949276  | 0.82424093  | -0.15867564 |
| H | 1.73762485  | -1.24025551 | -0.05853199 |
| N | -0.75998383 | 1.55940605  | -0.50182288 |
| H | 2.34961815  | 1.01781893  | -0.04256197 |
| S | -3.02229223 | 0.09961344  | -0.63013515 |
| S | 1.08560376  | 3.48416385  | -0.33402761 |
| C | -0.84855003 | -2.25531091 | -0.31919999 |
| H | -1.30470451 | -2.50726698 | 0.63239575  |
| H | -1.57416375 | -2.45144943 | -1.09822117 |
| H | -0.00330270 | -2.91654203 | -0.46572842 |
| O | -4.30750491 | 3.29038301  | 1.16354212  |
| H | -5.21553939 | 3.39999216  | 0.91375647  |
| H | -4.11019827 | 2.37185314  | 1.02180439  |
| O | 4.26318597  | 1.04290167  | 0.20326543  |
| H | 4.34706772  | 1.74802841  | 0.84522462  |
| H | 4.68751546  | 1.36655465  | -0.58025323 |
| O | 3.90259081  | 3.37399861  | 1.78082102  |
| H | 3.05776683  | 3.52601010  | 1.36429392  |
| H | 4.35018033  | 4.20915794  | 1.77439238  |
| O | -2.41364235 | 3.92011388  | -0.91429817 |
| H | -3.01051605 | 3.99136580  | -0.17341004 |
| H | -1.68643568 | 4.50676894  | -0.74320656 |

${}^3n_8\pi_8^*$

|   |             |             |             |
|---|-------------|-------------|-------------|
| C | 0.06728700  | -1.17040900 | -0.34398500 |
| C | -0.93201500 | -0.23037500 | -0.57390300 |
| C | 0.64242700  | 1.59313900  | -0.31555600 |
| C | 1.36056400  | -0.69703900 | -0.11869400 |
| H | -1.30537500 | 1.82687300  | -0.75188100 |
| N | 1.58977000  | 0.68665100  | -0.09753600 |
| H | 2.20123700  | -1.31136800 | 0.11952300  |
| N | -0.59260400 | 1.13941000  | -0.56862100 |
| H | 2.52939500  | 1.00286100  | 0.06541700  |
| S | -2.61445300 | -0.59981000 | -0.94267700 |
| S | 0.97431600  | 3.28723700  | -0.28953500 |
| C | -0.20899200 | -2.65336700 | -0.35066700 |
| H | -1.04794000 | -2.89661100 | 0.29149900  |
| H | -0.44222900 | -3.00690900 | -1.34959100 |
| H | 0.65580100  | -3.20185900 | 0.00200000  |
| O | -4.46061700 | 4.04014600  | 1.03371700  |
| H | -5.33722300 | 4.05267300  | 0.67107600  |
| H | -4.51171900 | 3.52933300  | 1.83182200  |
| O | 4.43468600  | 1.20125900  | 0.38711400  |
| H | 4.43969500  | 1.98262600  | 0.94037900  |
| H | 4.89350800  | 1.44999400  | -0.40423500 |
| O | 3.85741000  | 3.66215300  | 1.68155200  |
| H | 2.98226800  | 3.65211700  | 1.30044500  |
| H | 4.21722600  | 4.51392400  | 1.47385200  |
| O | -2.47796100 | 3.32479700  | -1.00025000 |
| H | -3.08084400 | 3.58381100  | -0.30776800 |
| H | -1.75482600 | 3.94041500  | -0.96365200 |

${}^3\pi_7\pi_7^*$

|   |             |             |             |
|---|-------------|-------------|-------------|
| C | -0.55246600 | -0.68060900 | -0.27693400 |
| C | -1.44789800 | 0.47609100  | -0.20197700 |
| C | 0.53154800  | 1.90132200  | -0.17723800 |
| C | 0.82472600  | -0.43962200 | -0.32172800 |
| H | 1.54594700  | -1.22932200 | -0.39153000 |
| N | -0.84949400 | 1.68688300  | -0.18347000 |
| H | -1.42767100 | 2.51364900  | -0.19130800 |
| N | 1.32018500  | 0.79515700  | -0.27135800 |
| H | 2.32281700  | 0.91275600  | -0.29615200 |
| S | -3.11301200 | 0.31598900  | -0.14345700 |
| S | 1.23269300  | 3.50174200  | -0.02404000 |
| C | -1.08081500 | -2.08653800 | -0.32252300 |
| H | -1.65923100 | -2.32033200 | 0.56410300  |
| H | -1.73134100 | -2.23682900 | -1.17692400 |
| H | -0.26040300 | -2.79368200 | -0.39017100 |
| O | -4.97000300 | 3.31251600  | -0.02725900 |
| H | -5.45171900 | 3.23366000  | -0.84276200 |
| H | -4.57211200 | 2.45433400  | 0.11247300  |
| O | 4.17798500  | 0.79214300  | -0.33663700 |
| H | 4.46604500  | 1.30861300  | 0.41540400  |
| H | 4.57629500  | 1.20061600  | -1.09496300 |
| O | 4.44829000  | 2.73416900  | 1.71810000  |
| H | 3.65995100  | 3.22743100  | 1.52098900  |
| H | 5.06804900  | 3.34656000  | 2.09307200  |
| O | -2.32606000 | 4.23246400  | -0.38174400 |
| H | -3.26915500 | 4.12885700  | -0.25981700 |
| H | -2.04563100 | 4.91495900  | 0.21232400  |

### III. aqueous solution

Snapshot1

gs

|   |             |             |             |
|---|-------------|-------------|-------------|
| C | -0.14328801 | -0.80692305 | -0.15736001 |
| C | -1.10271607 | 0.28906301  | -0.15826501 |
| C | 0.74314605  | 1.85127613  | 0.15459601  |
| C | 1.16326208  | -0.48284203 | -0.02713000 |
| H | -1.20671708 | 2.32394116  | -0.03010500 |
| N | 1.59139611  | 0.80987506  | 0.11028401  |
| H | 1.94682113  | -1.21446108 | -0.03076100 |
| N | -0.57210403 | 1.53307811  | 0.01057099  |
| H | 2.58307718  | 0.99361106  | 0.10442400  |
| S | -2.73258319 | 0.06312100  | -0.34568802 |
| S | 1.25232109  | 3.46025024  | 0.38143203  |
| C | -0.59923504 | -2.23200916 | -0.29371802 |
| H | -1.22796608 | -2.52021018 | 0.54032504  |
| H | -1.18153108 | -2.36690616 | -1.19541508 |
| H | 0.25418801  | -2.89981020 | -0.32779902 |
| O | -4.86199935 | 2.94888321  | -0.09742600 |
| H | -5.26726737 | 2.91807520  | -0.95386806 |
| H | -4.44432932 | 2.10054315  | 0.01265199  |
| O | 4.43762031  | 1.11286807  | -0.24261101 |
| H | 4.69241433  | 1.79984313  | 0.37503502  |
| H | 4.65090133  | 1.44909410  | -1.10238008 |
| O | 4.50121832  | 3.32073523  | 1.49559110  |
| H | 3.56677525  | 3.46962624  | 1.37685909  |
| H | 4.92073235  | 4.15942330  | 1.36198710  |
| O | -2.13281415 | 3.83257027  | -0.29523502 |
| H | -3.07795922 | 3.83053127  | -0.16031501 |
| H | -1.76123212 | 4.57097832  | 0.16596101  |

$^1n_8\pi_8^*$

|   |             |             |             |
|---|-------------|-------------|-------------|
| C | -0.09747400 | -0.85961006 | -0.15461600 |
| C | -0.96557906 | 0.22221601  | -0.16382301 |
| C | 0.84611406  | 1.78666213  | 0.15356100  |
| C | 1.25655109  | -0.58032904 | 0.01815900  |
| H | -1.09145608 | 2.29424416  | 0.01440599  |
| N | 1.68022312  | 0.74553505  | 0.13661201  |
| H | 2.02892714  | -1.31865309 | 0.02462400  |
| N | -0.46426603 | 1.51170510  | 0.03325000  |
| H | 2.66775819  | 0.93113306  | 0.12538901  |
| S | -2.69890519 | 0.12451501  | -0.40224103 |
| S | 1.37271310  | 3.41850724  | 0.32546302  |
| C | -0.58975604 | -2.27444816 | -0.30737102 |
| H | -1.19850208 | -2.57658118 | 0.53992103  |
| H | -1.19015008 | -2.39091917 | -1.20372708 |
| H | 0.24147502  | -2.96497521 | -0.37828202 |
| O | -5.23975237 | 2.95385921  | 0.10268700  |
| H | -5.62514140 | 2.69623719  | -0.72437205 |
| H | -5.46635039 | 2.27413816  | 0.72333505  |
| O | 4.56484632  | 1.12398008  | -0.26791501 |
| H | 4.77770134  | 1.80477413  | 0.37149402  |
| H | 4.62107233  | 1.54876211  | -1.11296008 |
| O | 4.54432932  | 3.31992024  | 1.51438111  |
| H | 3.59965925  | 3.39300724  | 1.38974009  |
| H | 4.89846435  | 4.16494429  | 1.27370309  |
| O | -2.40822817 | 3.54976325  | -0.18162301 |
| H | -3.34798924 | 3.55828325  | -0.02144200 |
| H | -2.05796214 | 4.39982831  | 0.04910000  |

${}^1\Pi_7\Pi_8^*$

|   |             |             |             |
|---|-------------|-------------|-------------|
| C | -0.19731901 | -0.84727806 | -0.15628401 |
|---|-------------|-------------|-------------|

|   |             |             |             |
|---|-------------|-------------|-------------|
| C | -1.15285008 | 0.18958201  | -0.17698101 |
| C | 0.68721605  | 1.74714712  | 0.12005500  |
| C | 1.15258908  | -0.57139904 | -0.00241600 |
| H | -1.21879008 | 2.30141516  | -0.03148800 |
| N | 1.57354611  | 0.75867905  | 0.11674101  |
| H | 1.93185813  | -1.30200609 | 0.02161500  |
| N | -0.59117204 | 1.50743910  | -0.00199399 |
| H | 2.55934918  | 0.97091407  | 0.10410700  |
| S | -2.84326220 | 0.06665700  | -0.38069002 |
| S | 1.27823709  | 3.40855824  | 0.34296502  |
| C | -0.64974204 | -2.27317216 | -0.29094702 |
| H | -1.27826809 | -2.55049518 | 0.54684803  |
| H | -1.24575509 | -2.39404817 | -1.18532208 |
| H | 0.19677701  | -2.95061721 | -0.33303102 |
| O | -4.69239733 | 2.86757220  | -0.13089200 |
| H | -5.13299537 | 2.75921820  | -0.96341406 |
| H | -4.26928830 | 2.02248814  | 0.02676900  |
| O | 4.39529731  | 1.22622308  | -0.18236401 |
| H | 4.70923434  | 1.93573213  | 0.37482102  |
| H | 4.81364934  | 1.33532409  | -1.02516907 |
| O | 4.66789133  | 3.51336725  | 1.46269210  |
| H | 3.81630927  | 3.92351328  | 1.40369810  |
| H | 5.27555138  | 4.18493130  | 1.74128712  |
| O | -2.06741615 | 3.89966128  | -0.28604802 |
| H | -3.00405021 | 3.68894826  | -0.29301302 |
| H | -1.96359814 | 4.63978433  | 0.29319402  |

${}^1n_7\pi_7^*$

|   |             |             |             |
|---|-------------|-------------|-------------|
| C | -0.16435175 | -0.90630097 | -0.12085476 |
| C | -1.07595561 | 0.21634822  | -0.16356483 |



|   |             |             |             |
|---|-------------|-------------|-------------|
| C | 0.82008135  | 1.72920350  | -0.05163404 |
| C | 1.16303430  | -0.62958172 | -0.01003066 |
| H | -1.14149232 | 2.25768188  | -0.15044511 |
| N | 1.65500154  | 0.64875739  | 0.05934084  |
| H | 1.90875766  | -1.39963010 | 0.01673966  |
| N | -0.53355147 | 1.46049182  | -0.07614363 |
| H | 2.64140706  | 0.79410035  | -0.05057251 |
| S | -2.74632719 | 0.03070576  | -0.32277469 |
| S | 1.37213882  | 3.34031754  | 0.52721411  |
| C | -0.67140503 | -2.32107795 | -0.18853329 |
| H | -1.29730476 | -2.56274741 | 0.66348833  |
| H | -1.26398542 | -2.48399381 | -1.08034751 |
| H | 0.15914163  | -3.01836748 | -0.20338268 |
| O | -4.77831005 | 2.96534698  | -0.09701630 |
| H | -5.16717510 | 2.85511724  | -0.95479555 |
| H | -4.47269973 | 2.10003461  | 0.15210163  |
| O | 4.53382564  | 1.15493473  | -0.24346558 |
| H | 4.73732034  | 1.86818369  | 0.35942357  |
| H | 4.99078088  | 1.34621891  | -1.05041435 |
| O | 4.60885421  | 3.43273823  | 1.52097625  |
| H | 3.95573087  | 3.25558659  | 2.18562188  |
| H | 4.24893368  | 4.14200745  | 1.00640356  |
| O | -2.03682683 | 3.89918658  | -0.26055155 |
| H | -2.98346036 | 3.78016816  | -0.19860357 |
| H | -1.80990977 | 4.61321821  | 0.31699168  |

$^3\Pi_8\Pi_8^*$

|   |             |             |             |
|---|-------------|-------------|-------------|
| C | -0.14774201 | -0.86267106 | -0.16092201 |
| C | -1.00829807 | 0.21544301  | -0.16383701 |
| C | 0.76338205  | 1.82270513  | 0.16861901  |

|   |             |             |             |
|---|-------------|-------------|-------------|
| C | 1.23695108  | -0.51563403 | 0.02624500  |
| H | -1.19245908 | 2.28892116  | -0.01382099 |
| N | 1.60219811  | 0.77326205  | 0.14665201  |
| H | 2.01385614  | -1.25505108 | 0.02977200  |
| N | -0.55497404 | 1.51507811  | 0.03308400  |
| H | 2.59000418  | 0.99095507  | 0.14533501  |
| S | -2.75410219 | 0.03934000  | -0.37642502 |
| S | 1.26503909  | 3.46217025  | 0.36256002  |
| C | -0.56556204 | -2.29474416 | -0.30879602 |
| H | -1.11807808 | -2.64211319 | 0.55676903  |
| H | -1.18996908 | -2.43386917 | -1.18160508 |
| H | 0.30731902  | -2.92836921 | -0.41883102 |
| O | -4.99496635 | 3.07759022  | -0.05911300 |
| H | -5.34381238 | 3.02630921  | -0.93766106 |
| H | -4.62367533 | 2.22775815  | 0.12188300  |
| O | 4.49878732  | 1.11762708  | -0.24427001 |
| H | 4.71419334  | 1.81438313  | 0.37960403  |
| H | 4.60417833  | 1.50863610  | -1.10055008 |
| O | 4.47908432  | 3.34379024  | 1.49241211  |
| H | 3.53020925  | 3.42355124  | 1.37384009  |
| H | 4.83436134  | 4.18808830  | 1.24992109  |
| O | -2.18686915 | 3.80213127  | -0.29303102 |
| H | -3.10418422 | 3.94932728  | -0.10608100 |
| H | -1.67460712 | 4.50640832  | 0.08668100  |

$^3\text{p}_8\pi_8^*$

|   |             |             |             |
|---|-------------|-------------|-------------|
| C | -0.10401013 | -0.85928409 | -0.16654091 |
| C | -0.98511925 | 0.21605711  | -0.17566698 |
| C | 0.82204577  | 1.78997035  | 0.14358208  |
| C | 1.24774433  | -0.57409496 | -0.01565869 |

|   |             |             |             |
|---|-------------|-------------|-------------|
| H | -1.10736279 | 2.30105236  | -0.05475494 |
| N | 1.66342349  | 0.75755340  | 0.13149583  |
| H | 2.02223923  | -1.30934031 | 0.02158911  |
| N | -0.47914718 | 1.51585195  | -0.00723965 |
| H | 2.64994870  | 0.94869292  | 0.12887236  |
| S | -2.73310969 | 0.09805882  | -0.35878799 |
| S | 1.34524229  | 3.41979928  | 0.33891806  |
| C | -0.58510325 | -2.28003154 | -0.30481438 |
| H | -1.24571801 | -2.54792560 | 0.51286304  |
| H | -1.13040797 | -2.42483080 | -1.22996574 |
| H | 0.25050149  | -2.96920203 | -0.30209503 |
| O | -5.09847649 | 3.01769606  | -0.03750502 |
| H | -5.14759673 | 2.52150901  | -0.84447659 |
| H | -5.34492980 | 2.41643523  | 0.65332326  |
| O | 4.54826131  | 1.11450678  | -0.25259627 |
| H | 4.77290581  | 1.80049689  | 0.37670910  |
| H | 4.65401232  | 1.51113614  | -1.10640518 |
| O | 4.54368667  | 3.33364598  | 1.50331569  |
| H | 3.59997889  | 3.41187927  | 1.38109893  |
| H | 4.90305336  | 4.17803625  | 1.26833245  |
| O | -2.26601337 | 3.68127499  | -0.19654398 |
| H | -3.20719802 | 3.70772863  | -0.04830156 |
| H | -1.88487212 | 4.48671021  | 0.12382600  |

${}^3\Pi_7\Pi_7^*$

|   |             |             |             |
|---|-------------|-------------|-------------|
| C | -0.17140101 | -0.80984805 | -0.14946800 |
| C | -1.13879008 | 0.28751502  | -0.15971901 |
| C | 0.72791605  | 1.82873213  | 0.13387700  |
| C | 1.18679308  | -0.48134803 | -0.02871900 |
| H | -1.24698208 | 2.31831016  | -0.07346200 |

|   |             |             |             |
|---|-------------|-------------|-------------|
| N | 1.59206811  | 0.78019105  | 0.10027200  |
| H | 1.96176014  | -1.22077708 | -0.05974800 |
| N | -0.62574904 | 1.52490111  | -0.00935500 |
| H | 2.58342418  | 0.97164206  | 0.09195600  |
| S | -2.78183919 | 0.03795900  | -0.35260802 |
| S | 1.26995509  | 3.46334724  | 0.42582603  |
| C | -0.60666004 | -2.23802716 | -0.28311301 |
| H | -1.22623808 | -2.54206118 | 0.55344903  |
| H | -1.19330808 | -2.38507617 | -1.18103308 |
| H | 0.25558501  | -2.89516720 | -0.32355202 |
| O | -4.82027234 | 2.93022120  | -0.10674501 |
| H | -5.25117437 | 2.89123720  | -0.95024206 |
| H | -4.40511031 | 2.07875114  | 0.00074899  |
| O | 4.43018331  | 1.13008808  | -0.23971201 |
| H | 4.71953733  | 1.81086513  | 0.36763902  |
| H | 4.69181733  | 1.41996310  | -1.10289807 |
| O | 4.57031732  | 3.34385124  | 1.49932310  |
| H | 3.64102126  | 3.52474325  | 1.40920009  |
| H | 5.01389536  | 4.17569630  | 1.40603410  |
| O | -2.12917515 | 3.91021328  | -0.31322702 |
| H | -3.07519122 | 3.82123227  | -0.20672001 |
| H | -1.84369313 | 4.63045133  | 0.22987601  |

## Snapshot2

gs

|   |              |              |             |
|---|--------------|--------------|-------------|
| C | -0.835150059 | -0.585180040 | 0.169536013 |
| C | -1.217628087 | 0.812085059  | 0.194543014 |
| C | 1.142136084  | 1.420091101  | 0.024356002 |
| C | 0.490234037  | -0.862040063 | 0.010700001 |
| N | -0.192011012 | 1.709814121  | 0.100210005 |

|                |              |              |              |
|----------------|--------------|--------------|--------------|
| N              | 1.431826104  | 0.111937006  | -0.075499004 |
| H              | 0.868311062  | -1.864146136 | -0.024985003 |
| H              | -0.415859032 | 2.697959197  | 0.098544006  |
| H              | 2.403708171  | -0.161488010 | -0.158931010 |
| S              | -2.791796203 | 1.319745093  | 0.338341026  |
| S              | 2.319925167  | 2.639538192  | 0.073960003  |
| C              | -1.847529134 | -1.681934121 | 0.353274027  |
| H              | -2.333214168 | -1.595202113 | 1.317849093  |
| H              | -2.621317191 | -1.634164116 | -0.398435029 |
| H              | -1.369343098 | -2.653302193 | 0.294759020  |
| O              | -3.056938220 | 4.747339341  | 1.124013081  |
| H              | -3.078247220 | 3.799280273  | 1.038388074  |
| H              | -3.780727271 | 5.067354367  | 0.602696045  |
| O              | 5.525100397  | 1.317755095  | 0.207476016  |
| H              | 4.726990338  | 1.813194130  | 0.376354029  |
| H              | 5.928003429  | 1.741813125  | -0.537617039 |
| O              | -0.550538039 | 4.543057328  | 0.022098003  |
| H              | 0.220585017  | 4.907605354  | 0.434442033  |
| H              | -1.321703096 | 4.899187351  | 0.456910031  |
| O              | 4.067882294  | -0.955870068 | -0.283429023 |
| H              | 4.409274318  | -1.337900095 | -1.080179080 |
| H              | 4.706648336  | -0.287291022 | -0.027859002 |
| $^1n_8\pi_8^*$ |              |              |              |
| C              | -0.815283057 | -0.560651040 | 0.191026012  |
| C              | -1.156395082 | 0.776565057  | 0.231396019  |
| C              | 1.166023081  | 1.440082105  | 0.021312000  |
| C              | 0.524494036  | -0.866488062 | -0.006193999 |
| N              | -0.143770008 | 1.737923127  | 0.124527012  |
| N              | 1.472156105  | 0.149911009  | -0.107042006 |
| H              | 0.904829065  | -1.863724133 | -0.070483007 |

|                    |              |              |              |
|--------------------|--------------|--------------|--------------|
| H                  | -0.365117024 | 2.723065196  | 0.141796013  |
| H                  | 2.436968173  | -0.119703011 | -0.204213014 |
| S                  | -2.831024203 | 1.306624095  | 0.426708033  |
| S                  | 2.348849170  | 2.681289193  | 0.067495002  |
| C                  | -1.835985133 | -1.652023118 | 0.374864025  |
| H                  | -2.309838165 | -1.586952113 | 1.348931097  |
| H                  | -2.615034190 | -1.603321116 | -0.375041029 |
| H                  | -1.369637099 | -2.626313190 | 0.299571019  |
| O                  | -3.208686231 | 4.760747343  | 0.941610070  |
| H                  | -3.181302229 | 3.814708277  | 1.023371072  |
| H                  | -3.967620287 | 4.947382354  | 0.405737030  |
| O                  | 5.549986402  | 1.351137099  | 0.208820015  |
| H                  | 4.741322342  | 1.832631133  | 0.373027028  |
| H                  | 5.941185430  | 1.774066129  | -0.543116037 |
| O                  | -0.630920047 | 4.552271325  | 0.025281004  |
| H                  | 0.109445010  | 5.048697365  | 0.366326025  |
| H                  | -1.429613101 | 4.964718360  | 0.351470025  |
| O                  | 4.110414297  | -0.940782066 | -0.314597023 |
| H                  | 4.474079322  | -1.319826094 | -1.102731080 |
| H                  | 4.731892340  | -0.262259017 | -0.046494005 |
| ${}^1\Pi_7\Pi_8^*$ |              |              |              |
| C                  | -1.029748076 | -0.606893045 | 0.242043017  |
| C                  | -1.396203098 | 0.748345056  | 0.238763018  |
| C                  | 0.958089067  | 1.292025095  | 0.020858003  |
| C                  | 0.297022020  | -0.981263073 | 0.066480003  |
| N                  | -0.292698023 | 1.667019118  | 0.126664009  |
| N                  | 1.281588090  | 0.011595999  | -0.033257001 |
| H                  | 0.661709045  | -1.984369143 | 0.115847007  |
| H                  | -0.483585036 | 2.661121189  | 0.142737011  |
| H                  | 2.250459160  | -0.254800020 | -0.120829010 |

|                    |              |              |              |
|--------------------|--------------|--------------|--------------|
| S                  | -2.976595212 | 1.424547102  | 0.329090024  |
| S                  | 2.262764160  | 2.499634179  | 0.008899999  |
| C                  | -2.067491151 | -1.675742123 | 0.451976030  |
| H                  | -2.554896186 | -1.542188110 | 1.411072100  |
| H                  | -2.836876204 | -1.623488119 | -0.303410020 |
| H                  | -1.618840117 | -2.662927192 | 0.421929028  |
| O                  | -3.048661221 | 4.693070336  | 1.045919076  |
| H                  | -3.065964222 | 3.735375267  | 1.073959078  |
| H                  | -3.802842271 | 4.934530353  | 0.525037040  |
| O                  | 5.781151413  | 1.176219083  | 0.139068009  |
| H                  | 5.316527381  | 1.772190127  | 0.712333052  |
| H                  | 5.937938425  | 1.663132120  | -0.659425048 |
| O                  | -0.479553033 | 4.577178328  | 0.128273010  |
| H                  | 0.049571002  | 5.034408363  | 0.766884056  |
| H                  | -1.389533099 | 4.797618345  | 0.338082026  |
| O                  | 3.966474285  | -0.887842063 | -0.258323018 |
| H                  | 4.293657307  | -1.388682098 | -0.992124071 |
| H                  | 4.654899336  | -0.258505018 | -0.047956006 |
| ${}^1n_{7\pi 7}^*$ |              |              |              |
| C                  | -0.944605070 | -0.657892048 | 0.191170012  |
| C                  | -1.275798092 | 0.745759051  | 0.183911013  |
| C                  | 1.069670075  | 1.271798094  | -0.209497013 |
| C                  | 0.360463027  | -0.994478073 | -0.021988003 |
| N                  | -0.254348018 | 1.628787120  | -0.022010001 |
| N                  | 1.341915095  | -0.065775007 | -0.214927017 |
| H                  | 0.692213050  | -2.013673143 | -0.046602005 |
| H                  | -0.451962033 | 2.613955187  | -0.030931003 |
| H                  | 2.289763165  | -0.372060026 | -0.336709022 |
| S                  | -2.850778204 | 1.318876094  | 0.404706029  |
| S                  | 2.362764172  | 2.442835177  | 0.226909019  |

|                    |              |              |              |
|--------------------|--------------|--------------|--------------|
| C                  | -1.985806145 | -1.716120125 | 0.447932031  |
| H                  | -2.431737177 | -1.604626114 | 1.430313102  |
| H                  | -2.788796202 | -1.675167119 | -0.275525020 |
| H                  | -1.537520110 | -2.702139194 | 0.393471029  |
| O                  | -3.010903218 | 4.773479343  | 1.063596078  |
| H                  | -3.062101223 | 3.830965274  | 1.182078086  |
| H                  | -3.766195270 | 5.005547358  | 0.539974037  |
| O                  | 5.679567411  | 1.256453091  | 0.162080012  |
| H                  | 5.231212377  | 1.675421119  | 0.886033065  |
| H                  | 5.506696396  | 1.813448130  | -0.586088040 |
| O                  | -0.425066028 | 4.589461331  | 0.088895004  |
| H                  | 0.182213015  | 4.976956356  | 0.703746050  |
| H                  | -1.297714094 | 4.864562352  | 0.364791025  |
| O                  | 4.103921297  | -0.960999071 | -0.395933027 |
| H                  | 4.519103326  | -1.407240100 | -1.120883082 |
| H                  | 4.728192338  | -0.294510021 | -0.113441007 |
| ${}^3\Pi_g\Pi_g^*$ |              |              |              |
| C                  | -0.914942066 | -0.635066045 | 0.133072007  |
| C                  | -1.246141088 | 0.711325054  | 0.126551009  |
| C                  | 1.086940076  | 1.374386099  | 0.012583999  |
| C                  | 0.465857032  | -0.956795070 | -0.013460999 |
| N                  | -0.226759018 | 1.665140120  | 0.031480003  |
| N                  | 1.397340099  | 0.069473003  | -0.028345004 |
| H                  | 0.854774062  | -1.950585139 | 0.034447005  |
| H                  | -0.465542034 | 2.644657189  | 0.008254001  |
| H                  | 2.372128169  | -0.181120015 | -0.078040007 |
| S                  | -2.905101207 | 1.316832094  | 0.322953023  |
| S                  | 2.277771162  | 2.595885186  | 0.050127003  |
| C                  | -1.905507138 | -1.751459127 | 0.338473024  |
| H                  | -2.156088155 | -1.854061134 | 1.388784102  |



|                  |              |              |              |
|------------------|--------------|--------------|--------------|
| H                | -2.824904204 | -1.578224112 | -0.198554014 |
| H                | -1.485946109 | -2.692324194 | 0.004183998  |
| O                | -2.933071209 | 4.884769351  | 1.263777090  |
| H                | -3.019221218 | 3.969475287  | 1.027670076  |
| H                | -3.563655255 | 5.347509386  | 0.728935051  |
| O                | 5.458804394  | 1.363889096  | 0.227986016  |
| H                | 4.629651332  | 1.805215132  | 0.404542031  |
| H                | 5.791039418  | 1.778801128  | -0.556221038 |
| O                | -0.534704040 | 4.538877325  | -0.046614001 |
| H                | 0.368188025  | 4.666138336  | 0.218128016  |
| H                | -1.102286079 | 4.966685359  | 0.585918041  |
| O                | 4.076081293  | -0.966623072 | -0.228820016 |
| H                | 4.398574317  | -1.312349095 | -1.049287078 |
| H                | 4.691246336  | -0.272158018 | 0.013422999  |
| $^3\pi_8\pi_8^*$ |              |              |              |
| C                | -0.842431061 | -0.655840046 | 0.111189009  |
| C                | -1.187277083 | 0.696928051  | 0.080366006  |
| C                | 1.131899081  | 1.369206100  | -0.024169001 |
| C                | 0.506984037  | -0.957207066 | -0.025176999 |
| N                | -0.180473011 | 1.661546118  | -0.018374002 |
| N                | 1.450278102  | 0.074541008  | -0.063043002 |
| H                | 0.908369065  | -1.947049140 | 0.038743003  |
| H                | -0.413943029 | 2.641276190  | -0.065840006 |
| H                | 2.423856177  | -0.173492010 | -0.096225009 |
| S                | -2.840099206 | 1.333253093  | 0.225004018  |
| S                | 2.291887166  | 2.604069188  | 0.027124001  |
| C                | -1.861291135 | -1.747194128 | 0.307131020  |
| H                | -2.422164175 | -1.595386113 | 1.223676091  |
| H                | -2.569081184 | -1.794916131 | -0.510563037 |
| H                | -1.371756099 | -2.710737197 | 0.372092025  |

|                    |              |              |              |
|--------------------|--------------|--------------|--------------|
| O                  | -3.000931217 | 4.777583345  | 1.359955097  |
| H                  | -3.181087230 | 4.068955291  | 1.963027144  |
| H                  | -3.642791263 | 4.704388337  | 0.665990047  |
| O                  | 5.477746394  | 1.367403097  | 0.216646018  |
| H                  | 4.644578332  | 1.805751130  | 0.383620030  |
| H                  | 5.815833421  | 1.782305128  | -0.564891041 |
| O                  | -0.633197044 | 4.491823323  | -0.069531007 |
| H                  | 0.240014019  | 4.732245338  | 0.215121014  |
| H                  | -1.260032092 | 4.825455349  | 0.563664043  |
| O                  | 4.132105298  | -0.980340071 | -0.229706017 |
| H                  | 4.453494322  | -1.333294094 | -1.047435074 |
| H                  | 4.744547344  | -0.281446021 | 0.005743002  |
| ${}^3\Pi_7\Pi_7^*$ |              |              |              |
| C                  | -0.846114061 | -0.567722038 | 0.168969010  |
| C                  | -1.229273087 | 0.833703060  | 0.171661014  |
| C                  | 1.116665079  | 1.437353101  | -0.111755006 |
| C                  | 0.478450032  | -0.856771061 | 0.000100999  |
| N                  | -0.220641015 | 1.737915126  | 0.054274006  |
| N                  | 1.428030104  | 0.106790006  | -0.129837009 |
| H                  | 0.847387060  | -1.863386132 | -0.018859999 |
| H                  | -0.443784033 | 2.721953194  | 0.044129001  |
| H                  | 2.385894171  | -0.172401011 | -0.252224017 |
| S                  | -2.829916206 | 1.338745096  | 0.308991020  |
| S                  | 2.319219165  | 2.570885186  | 0.451181031  |
| C                  | -1.859031135 | -1.660954122 | 0.378695025  |
| H                  | -2.353998171 | -1.555781112 | 1.337714095  |
| H                  | -2.627862187 | -1.648099121 | -0.381504030 |
| H                  | -1.375409099 | -2.631130190 | 0.351204023  |
| O                  | -3.105261226 | 4.770637343  | 1.069674076  |
| H                  | -3.152334225 | 3.820316275  | 1.094636081  |

|   |              |              |              |
|---|--------------|--------------|--------------|
| H | -3.843700274 | 5.048404365  | 0.544455041  |
| O | 5.617858406  | 1.218245086  | 0.210524014  |
| H | 4.857923347  | 1.732189127  | 0.464227034  |
| H | 5.991176429  | 1.670036121  | -0.533673038 |
| O | -0.515035035 | 4.644955334  | 0.098020005  |
| H | 0.132077011  | 4.957943356  | 0.714691049  |
| H | -1.368874099 | 4.927078352  | 0.421527028  |
| O | 4.081047293  | -0.996191073 | -0.353281028 |
| H | 4.437281321  | -1.411344103 | -1.126389081 |
| H | 4.740681339  | -0.361049027 | -0.075970004 |

### Snapshot3

gs

|   |              |              |              |
|---|--------------|--------------|--------------|
| C | -0.123090010 | -0.863976063 | 0.077826008  |
| C | -0.622401045 | 0.503149036  | 0.055893003  |
| C | 1.675546121  | 1.304764095  | -0.004853000 |
| C | 1.219111090  | -1.031058075 | 0.066008004  |
| N | 0.325923025  | 1.479362107  | 0.021111002  |
| N | 2.089121150  | 0.027905003  | 0.031602000  |
| H | 1.688497120  | -1.994276145 | 0.086527005  |
| H | 0.007439999  | 2.442232174  | -0.032315002 |
| H | 3.074808224  | -0.175153013 | -0.007247998 |
| S | -2.237731161 | 0.875130061  | 0.065581005  |
| S | 2.724139199  | 2.641781190  | -0.092898008 |
| C | -1.073317075 | -2.026322146 | 0.116533006  |
| H | -1.637798119 | -2.038925148 | 1.040391074  |
| H | -1.786082131 | -1.972999140 | -0.695394051 |
| H | -0.526911037 | -2.956963213 | 0.033345004  |
| O | 4.779843345  | -0.984724072 | -0.102911010 |
| H | 5.326061382  | -0.195289017 | -0.095789009 |
| H | 5.095322369  | -1.507133107 | -0.828361058 |

|                  |              |              |              |
|------------------|--------------|--------------|--------------|
| O                | -0.476397036 | 4.213780304  | -0.110109006 |
| H                | -1.262820088 | 4.425137316  | 0.388941029  |
| H                | 0.231841014  | 4.745718339  | 0.221869018  |
| O                | 5.907771427  | 1.578363116  | -0.265245021 |
| H                | 5.059229363  | 1.980889141  | -0.436040032 |
| H                | 6.193190447  | 1.954793141  | 0.556860040  |
| O                | -3.000182214 | 4.076262292  | 1.189449086  |
| H                | -3.713000267 | 4.292956306  | 0.603859045  |
| H                | -2.872739208 | 3.138293227  | 1.089142078  |
| $^1n_{8\pi 8}^*$ |              |              |              |
| C                | -0.153077013 | -0.835762063 | 0.080317004  |
| C                | -0.614170042 | 0.466756035  | 0.059051006  |
| C                | 1.666492121  | 1.308245092  | -0.006467001 |
| C                | 1.220322086  | -1.045581075 | 0.066491005  |
| N                | 0.331337021  | 1.494001108  | 0.021914002  |
| N                | 2.092917150  | 0.045507005  | 0.028931004  |
| H                | 1.682171119  | -2.011619146 | 0.086237005  |
| H                | 0.020796999  | 2.449391175  | -0.029370004 |
| H                | 3.083888223  | -0.151513009 | -0.011765002 |
| S                | -2.338851170 | 0.866621060  | 0.065963002  |
| S                | 2.735600199  | 2.647380192  | -0.097214009 |
| C                | -1.097975078 | -1.999822145 | 0.119851011  |
| H                | -1.662467119 | -2.011566144 | 1.043989077  |
| H                | -1.810629129 | -1.947883139 | -0.693385050 |
| H                | -0.553029040 | -2.931142210 | 0.037891001  |
| O                | 4.779280343  | -0.956717070 | -0.095723005 |
| H                | 5.326883385  | -0.168339014 | -0.084234006 |
| H                | 5.097180368  | -1.484515108 | -0.815417060 |
| O                | -0.485729035 | 4.223331302  | -0.107331005 |
| H                | -1.286362094 | 4.423067318  | 0.368883025  |

|                                              |              |              |              |
|----------------------------------------------|--------------|--------------|--------------|
| H                                            | 0.200619017  | 4.777361345  | 0.238819015  |
| O                                            | 5.924522427  | 1.604648117  | -0.251550020 |
| H                                            | 5.080430368  | 2.017509143  | -0.425713032 |
| H                                            | 6.212595446  | 1.974903141  | 0.571870042  |
| O                                            | -3.004224218 | 4.057671290  | 1.174215084  |
| H                                            | -3.732380267 | 4.267386308  | 0.604914044  |
| H                                            | -2.876200207 | 3.122038224  | 1.084121080  |
| <sup>1</sup> π <sub>7</sub> π <sub>8</sub> * |              |              |              |
| C                                            | -0.219178014 | -0.859912061 | 0.117161007  |
| C                                            | -0.714239053 | 0.458260031  | 0.083539006  |
| C                                            | 1.591335113  | 1.217123088  | 0.068686006  |
| C                                            | 1.145750084  | -1.111162080 | 0.131736009  |
| N                                            | 0.309129024  | 1.474862105  | 0.064670005  |
| N                                            | 2.037858146  | -0.033187002 | 0.110272008  |
| H                                            | 1.594640116  | -2.079618148 | 0.173252012  |
| H                                            | 0.014680001  | 2.442768178  | 0.017011001  |
| H                                            | 3.028660216  | -0.217223017 | 0.067169003  |
| S                                            | -2.337387170 | 0.977772069  | 0.008429000  |
| S                                            | 2.767801201  | 2.537506183  | -0.005217000 |
| C                                            | -1.183587083 | -2.010914145 | 0.137204008  |
| H                                            | -1.734293125 | -2.026735147 | 1.069401078  |
| H                                            | -1.909199139 | -1.910466137 | -0.658058045 |
| H                                            | -0.663066046 | -2.954584212 | 0.023590002  |
| O                                            | 4.795730347  | -0.780962054 | -0.144599012 |
| H                                            | 5.329133383  | -0.000566998 | -0.290013020 |
| H                                            | 5.059777363  | -1.410619104 | -0.801464058 |
| O                                            | -0.414964029 | 4.279593306  | -0.048062005 |
| H                                            | -1.323876094 | 4.292796310  | 0.259218020  |
| H                                            | 0.021728002  | 4.979831360  | 0.415923031  |
| O                                            | 6.118981440  | 1.715050123  | -0.572504044 |

|                    |              |              |              |
|--------------------|--------------|--------------|--------------|
| H                  | 5.636179406  | 2.398829173  | -0.129545009 |
| H                  | 7.034276504  | 1.861935133  | -0.378714027 |
| O                  | -2.956754214 | 4.005268291  | 1.142261081  |
| H                  | -3.711944267 | 4.140349298  | 0.585096044  |
| H                  | -2.802282200 | 3.060052222  | 1.102381077  |
| ${}^1n_{\pi\pi}^*$ |              |              |              |
| C                  | -0.192610014 | -0.870524060 | 0.125774007  |
| C                  | -0.637714048 | 0.523392040  | 0.079784006  |
| C                  | 1.670415118  | 1.235422090  | 0.194173014  |
| C                  | 1.138250081  | -1.087557076 | 0.159165012  |
| N                  | 0.316096023  | 1.475433109  | 0.093152008  |
| N                  | 2.063057149  | -0.085077006 | 0.176318012  |
| H                  | 1.547367109  | -2.076210151 | 0.179427013  |
| H                  | 0.032435004  | 2.440889175  | 0.039541002  |
| H                  | 3.033223216  | -0.322659022 | 0.151017011  |
| S                  | -2.258058161 | 0.946579071  | -0.010112000 |
| S                  | 2.831492202  | 2.526680179  | -0.258264020 |
| C                  | -1.185204084 | -1.997313146 | 0.124292009  |
| H                  | -1.782683130 | -1.998568143 | 1.028003076  |
| H                  | -1.867043133 | -1.921668137 | -0.713067052 |
| H                  | -0.673390051 | -2.950135212 | 0.057031004  |
| O                  | 4.865521348  | -0.901415062 | -0.075498004 |
| H                  | 5.390334388  | -0.109769010 | -0.178258013 |
| H                  | 5.196363372  | -1.520337111 | -0.711606052 |
| O                  | -0.447777030 | 4.301163311  | -0.042307001 |
| H                  | -1.321877095 | 4.383918314  | 0.340644027  |
| H                  | 0.074127006  | 4.994820359  | 0.334481022  |
| O                  | 6.067861436  | 1.692353124  | -0.437485030 |
| H                  | 5.626123403  | 2.099136152  | -1.171621083 |
| H                  | 5.788783414  | 2.181925155  | 0.325262024  |

|                    |              |              |              |
|--------------------|--------------|--------------|--------------|
| O                  | -3.020356218 | 4.094695293  | 1.182496083  |
| H                  | -3.738564269 | 4.175174299  | 0.568392040  |
| H                  | -2.913461207 | 3.157875230  | 1.310680096  |
| ${}^3\Pi_u\Pi_g^*$ |              |              |              |
| C                  | -0.178953264 | -0.897712526 | 0.067572302  |
| C                  | -0.605094295 | 0.426339567  | 0.030022302  |
| C                  | 1.662403870  | 1.275442627  | 0.028454302  |
| C                  | 1.224688838  | -1.096232540 | 0.113494309  |
| N                  | 0.327526773  | 1.465804643  | 0.042338299  |
| N                  | 2.072604896  | -0.005264462 | 0.082250303  |
| H                  | 1.691701868  | -2.057009611 | 0.136951307  |
| H                  | 0.007322747  | 2.417056709  | -0.033503707 |
| H                  | 3.058970968  | -0.191788478 | 0.054484304  |
| S                  | -2.294850916 | 0.892980528  | 0.006067703  |
| S                  | 2.726269944  | 2.614212727  | -0.060849708 |
| C                  | -1.114225330 | -2.077344612 | 0.090303306  |
| H                  | -1.521658363 | -2.251716623 | 1.080499378  |
| H                  | -1.945441390 | -1.945083601 | -0.589818742 |
| H                  | -0.583305294 | -2.972776675 | -0.205685717 |
| O                  | 4.813899095  | -0.997706537 | -0.068342705 |
| H                  | 5.329720132  | -0.188852476 | -0.073044709 |
| H                  | 5.101912115  | -1.484391572 | -0.828181760 |
| O                  | -0.489829287 | 4.225238843  | -0.158186714 |
| H                  | -1.149611334 | 4.547270864  | 0.448123331  |
| H                  | 0.345770773  | 4.603709867  | 0.083489303  |
| O                  | 5.881057171  | 1.597315652  | -0.254351720 |
| H                  | 5.010553108  | 1.955946678  | -0.419353732 |
| H                  | 6.129507191  | 1.961299676  | 0.584239340  |
| O                  | -2.969199214 | 4.225353304  | 1.270928089  |
| H                  | -3.664397263 | 4.445036318  | 0.665286045  |

|                  |              |              |              |
|------------------|--------------|--------------|--------------|
| H                | -2.873567206 | 3.284178234  | 1.216254089  |
| ${}^3n_8\pi_8^*$ |              |              |              |
| C                | -0.166096012 | -0.855054061 | 0.070432005  |
| C                | -0.588915042 | 0.459018035  | 0.026771003  |
| C                | 1.683688122  | 1.278421091  | -0.007386002 |
| C                | 1.218289087  | -1.086789081 | 0.062353003  |
| N                | 0.363482026  | 1.489532105  | -0.028246000 |
| N                | 2.087546149  | 0.011395001  | 0.054121005  |
| H                | 1.676753121  | -2.047548149 | 0.146429012  |
| H                | 0.053400006  | 2.444735177  | -0.129501008 |
| H                | 3.073611219  | -0.181977013 | 0.042779001  |
| S                | -2.296845165 | 0.987763073  | -0.009107003 |
| S                | 2.755844197  | 2.595787188  | -0.076215007 |
| C                | -1.130061079 | -2.011287146 | 0.127306007  |
| H                | -1.687363120 | -2.005696145 | 1.056088074  |
| H                | -1.843510134 | -1.978501144 | -0.686101047 |
| H                | -0.595467045 | -2.949200214 | 0.058277005  |
| O                | 4.812388349  | -1.003292071 | -0.070000006 |
| H                | 5.345791385  | -0.206358013 | -0.085278004 |
| H                | 5.091728366  | -1.509954108 | -0.820217058 |
| O                | -0.504912038 | 4.219409305  | -0.145348009 |
| H                | -1.224838090 | 4.410140317  | 0.449144032  |
| H                | 0.254595017  | 4.702546339  | 0.151478009  |
| O                | 5.918894426  | 1.577774115  | -0.267094019 |
| H                | 5.056386364  | 1.943397139  | -0.451401031 |
| H                | 6.151549442  | 1.937510138  | 0.578010043  |
| O                | -3.066034221 | 4.188196304  | 1.152409081  |
| H                | -3.528424253 | 3.973636287  | 0.353086026  |
| H                | -3.314717238 | 3.523947255  | 1.779504129  |

${}^3\pi_7\pi_7^*$



|   |              |              |              |
|---|--------------|--------------|--------------|
| C | -0.158842013 | -0.861949060 | 0.083200004  |
| C | -0.651398048 | 0.505770035  | 0.062203002  |
| C | 1.668616122  | 1.262789089  | 0.019331004  |
| C | 1.245608090  | -1.064323078 | 0.076059006  |
| N | 0.292737023  | 1.479673104  | 0.039796002  |
| N | 2.079931151  | -0.016116003 | 0.040429004  |
| H | 1.699931122  | -2.032420146 | 0.102448006  |
| H | -0.007138003 | 2.444554178  | -0.004762003 |
| H | 3.069851219  | -0.211102013 | 0.002878999  |
| S | -2.282597163 | 0.903428063  | 0.060838005  |
| S | 2.743093195  | 2.608333187  | -0.114505008 |
| C | -1.104095082 | -2.020576143 | 0.122831009  |
| H | -1.649247118 | -2.053588146 | 1.060145075  |
| H | -1.841244133 | -1.951277139 | -0.667641048 |
| H | -0.565430039 | -2.953259210 | 0.008751999  |
| O | 4.790198343  | -0.953260071 | -0.112977009 |
| H | 5.358037388  | -0.181313012 | -0.130983011 |
| H | 5.086546366  | -1.510365110 | -0.820170061 |
| O | -0.475139034 | 4.272565308  | -0.082850006 |
| H | -1.320558094 | 4.411747317  | 0.341735026  |
| H | 0.135645010  | 4.879079351  | 0.312786025  |
| O | 5.978029428  | 1.590353114  | -0.307058020 |
| H | 5.143910370  | 2.022991144  | -0.458254035 |
| H | 6.310393455  | 1.960583139  | 0.499890035  |
| O | -3.016547216 | 4.063937294  | 1.164797083  |
| H | -3.750847272 | 4.235942305  | 0.590324040  |
| H | -2.870556209 | 3.124557225  | 1.101271080  |

**Cartesian coordinates of optimized conical intersection structures**

**I. gas phase**

${}^1n_8\pi_8^*/{}^1n_7\pi_7^*$

|   |             |             |             |
|---|-------------|-------------|-------------|
| C | -0.62015700 | -1.39686500 | 0.01152600  |
| C | -1.02591900 | -0.00212200 | 0.05364400  |
| C | 1.34171600  | 0.64982200  | 0.16720700  |
| C | 0.70848700  | -1.67248400 | 0.03495600  |
| H | 1.08553900  | -2.67545200 | 0.01140500  |
| N | -0.01566600 | 0.92362100  | 0.12142200  |
| H | -0.29186100 | 1.88057000  | 0.15748700  |
| N | 1.67090200  | -0.68858400 | 0.10333400  |
| H | 2.63063300  | -0.94549200 | 0.11965000  |
| S | -2.62162200 | 0.51743400  | 0.03632900  |
| S | 2.50580600  | 1.87842400  | -0.44637200 |
| C | -1.64666400 | -2.49828900 | -0.05521600 |
| H | -2.30960200 | -2.47147600 | 0.80220500  |
| H | -2.26147900 | -2.41362300 | -0.94402700 |
| H | -1.15832600 | -3.46610300 | -0.07355000 |

${}^1\pi_7\pi_8^*/{}^1n_7\pi_7^*$

|   |             |             |             |
|---|-------------|-------------|-------------|
| C | -0.61249000 | -1.41505200 | -0.00272900 |
| C | -1.05192200 | -0.02585300 | -0.00787700 |
| C | 1.28448000  | 0.62104200  | 0.01647500  |
| C | 0.70757900  | -1.70811700 | 0.00015900  |
| H | 1.11095400  | -2.70104400 | 0.00520600  |
| N | 0.00007400  | 0.88745600  | 0.02238800  |
| H | -0.29317500 | 1.84478700  | 0.06064700  |
| N | 1.68381700  | -0.67353600 | -0.00119600 |
| H | 2.64856000  | -0.89262200 | -0.04798700 |
| S | -2.63007500 | 0.59191700  | -0.01324200 |
| S | 2.53038800  | 1.91769900  | 0.04491000  |
| C | -1.64536700 | -2.50437000 | 0.00585800  |

|   |             |             |             |
|---|-------------|-------------|-------------|
| H | -2.28589400 | -2.42483100 | 0.87671400  |
| H | -2.28272100 | -2.41843800 | -0.86450500 |
| H | -1.17242100 | -3.47965200 | 0.00517800  |

${}^3\pi_8\pi_8^*/{}^3n_8\pi_7^*$

|   |             |             |             |
|---|-------------|-------------|-------------|
| C | -0.60376207 | -1.43007061 | 0.01900146  |
| C | -1.00024524 | -0.04754125 | 0.07914243  |
| C | 1.33809165  | 0.65210075  | -0.00324898 |
| C | 0.72082654  | -1.70129552 | -0.03078526 |
| H | 1.13164315  | -2.69057450 | -0.04059718 |
| N | 0.00349011  | 0.93235238  | 0.02423849  |
| H | -0.21586467 | 1.89652289  | 0.11807792  |
| N | 1.66225748  | -0.65674220 | -0.03154968 |
| H | 2.63213006  | -0.86479826 | -0.05738824 |
| S | -2.65543929 | 0.45353445  | -0.22803991 |
| S | 2.49306258  | 1.88187486  | 0.00885423  |
| C | -1.66891378 | -2.48777803 | 0.03010196  |
| H | -2.30872132 | -2.43939715 | 0.90467619  |
| H | -2.31198975 | -2.40372680 | -0.84452909 |
| H | -1.22477942 | -3.47507602 | 0.05204567  |

${}^3n_8\pi_8^*/{}^3\pi_7\pi_7^*$

|   |             |             |             |
|---|-------------|-------------|-------------|
| C | -0.62570193 | -1.39252494 | 0.01239206  |
| C | -1.03445073 | -0.00188974 | 0.05321450  |
| C | 1.33607684  | 0.64685255  | 0.18964565  |
| C | 0.70953936  | -1.67003503 | 0.02054769  |
| H | 1.08931139  | -2.67289356 | -0.00996651 |
| N | -0.01735730 | 0.91843561  | 0.09211616  |
| H | -0.28303204 | 1.87742503  | 0.12007490  |
| N | 1.66014314  | -0.68418596 | 0.06691984  |

|   |             |             |             |
|---|-------------|-------------|-------------|
| H | 2.62149008  | -0.92649177 | 0.13869037  |
| S | -2.62649573 | 0.52294511  | 0.04439011  |
| S | 2.52529959  | 1.85825642  | -0.39542421 |
| C | -1.64406670 | -2.50035928 | -0.04680436 |
| H | -2.30345132 | -2.47466336 | 0.81194147  |
| H | -2.26203660 | -2.41428709 | -0.93193641 |
| H | -1.15348407 | -3.46719699 | -0.06580125 |

## II. microsolvated surrounding

${}^1n_8\pi_8^*/{}^1\pi_7\pi_8^*$

|   |             |             |             |
|---|-------------|-------------|-------------|
| N | 1.32832800  | 0.80313300  | -0.00103900 |
| C | 0.47738900  | 1.80361300  | -0.16786100 |
| N | -0.80652900 | 1.57527100  | -0.30621200 |
| C | -1.38869900 | 0.25779400  | -0.29187400 |
| C | -0.47619800 | -0.78904500 | -0.08837900 |
| C | 0.88002600  | -0.52446400 | 0.06019600  |
| S | 1.11455700  | 3.46333000  | -0.18065900 |
| H | 2.31534100  | 0.99262900  | 0.07104500  |
| H | -1.42264900 | 2.37023800  | -0.42496100 |
| H | 1.63703400  | -1.25844300 | 0.23102500  |
| C | -0.96303700 | -2.21260200 | -0.03555100 |
| H | -0.13861400 | -2.89795800 | 0.12999100  |
| H | -1.68775700 | -2.33619900 | 0.76063400  |
| H | -1.45704200 | -2.48087600 | -0.96145700 |
| S | -3.08966300 | 0.14831800  | -0.54100400 |
| O | -4.92626200 | 2.89792500  | 0.22785200  |
| H | -5.54843900 | 2.77529700  | -0.47714200 |
| H | -4.47733700 | 2.05593100  | 0.30232400  |
| O | 4.19105000  | 1.01064100  | 0.21257700  |
| H | 4.57340500  | 1.76540700  | 0.65738000  |

|   |             |            |             |
|---|-------------|------------|-------------|
| H | 4.73281600  | 0.85552400 | -0.54932300 |
| O | 5.28821800  | 3.38145300 | 1.41194900  |
| H | 4.77156900  | 4.16768200 | 1.29518800  |
| H | 5.63946500  | 3.42190700 | 2.29164000  |
| O | -2.42861700 | 3.97896600 | -0.53464300 |
| H | -3.33759000 | 3.72426700 | -0.36628400 |
| H | -2.23916100 | 4.67656100 | 0.07740400  |

${}^1n_8\pi_8^*/{}^1n_7\pi_7^*$

|   |             |             |             |
|---|-------------|-------------|-------------|
| C | -0.12062000 | -0.76379000 | -0.15257200 |
| C | -1.05957500 | 0.32744700  | -0.15219100 |
| C | 0.78231000  | 1.88269300  | -0.52287700 |
| C | 1.19867000  | -0.46247600 | -0.30798400 |
| H | -1.18559800 | 2.36866400  | -0.33541400 |
| N | 1.64723700  | 0.82465700  | -0.46924600 |
| H | 1.95761200  | -1.21855000 | -0.32079500 |
| N | -0.54938700 | 1.59144900  | -0.30454300 |
| H | 2.63134300  | 0.99376300  | -0.58254700 |
| S | -2.72772000 | 0.11175400  | 0.01597900  |
| S | 1.38977700  | 3.53571900  | -0.11880300 |
| C | -0.57151900 | -2.19069600 | 0.01641400  |
| H | -1.08160400 | -2.32554600 | 0.96376900  |
| H | -1.25628200 | -2.47660000 | -0.77438600 |
| H | 0.27153900  | -2.87424600 | -0.00842600 |
| O | -4.87826600 | 3.01188200  | -0.02769200 |
| H | -5.34731100 | 2.81083300  | -0.82730500 |
| H | -4.53485400 | 2.17989500  | 0.27799000  |
| O | 4.54564400  | 1.30320200  | -0.45448700 |
| H | 4.65474300  | 1.77678500  | 0.36855500  |
| H | 4.96714600  | 1.83039000  | -1.11921900 |

|   |             |            |             |
|---|-------------|------------|-------------|
| O | 4.31749900  | 2.88340600 | 1.94754100  |
| H | 3.38288700  | 3.04917100 | 1.92071700  |
| H | 4.72200900  | 3.69941200 | 2.20806700  |
| O | -2.23406300 | 4.01747100 | -0.42549800 |
| H | -3.17100200 | 3.85431100 | -0.33998800 |
| H | -2.03282900 | 4.71281200 | 0.18510000  |

${}^1\pi_7\pi_8^*/{}^1n_7\pi_7^*$

|   |             |             |             |
|---|-------------|-------------|-------------|
| C | -0.18166300 | -0.83247500 | -0.22466200 |
| C | -1.13122900 | 0.26050500  | -0.28052500 |
| C | 0.71722100  | 1.78731200  | -0.41389200 |
| C | 1.14073200  | -0.55712900 | -0.26987000 |
| H | -1.19767000 | 2.31497000  | -0.42382000 |
| N | 1.60853300  | 0.77909600  | -0.34534800 |
| H | 1.91300400  | -1.29703000 | -0.24123200 |
| N | -0.56619900 | 1.52692400  | -0.36904100 |
| H | 2.59290200  | 0.96153300  | -0.38298400 |
| S | -2.85082100 | 0.10902700  | -0.23330500 |
| S | 1.32971800  | 3.47621300  | -0.43801400 |
| C | -0.67570600 | -2.24943800 | -0.11370100 |
| H | -1.26165200 | -2.38267400 | 0.78765500  |
| H | -1.31448100 | -2.49929300 | -0.95330000 |
| H | 0.15608100  | -2.94477100 | -0.09208800 |
| O | -4.68525100 | 2.99398200  | 0.19427000  |
| H | -5.28628600 | 2.82497500  | -0.51961700 |
| H | -4.29726300 | 2.14536800  | 0.39459800  |
| O | 4.46657400  | 1.32806900  | -0.27285500 |
| H | 4.62664700  | 1.90746500  | 0.46974200  |
| H | 5.01651600  | 1.63812100  | -0.97896800 |
| O | 4.39628700  | 3.23353100  | 1.88131200  |

|   |             |            |             |
|---|-------------|------------|-------------|
| H | 3.47591500  | 3.44029100 | 1.98513000  |
| H | 4.87937600  | 3.99440100 | 2.17406300  |
| O | -2.12786200 | 3.99431000 | -0.45467000 |
| H | -3.05196100 | 3.76715200 | -0.33592300 |
| H | -1.97367700 | 4.73337800 | 0.11720100  |

${}^3\pi_8\pi_8^*/{}^3\pi_8\pi_7^*$

|   |             |             |             |
|---|-------------|-------------|-------------|
| C | -0.05757682 | -0.82624827 | -0.22238540 |
| C | -0.93543147 | 0.25009245  | -0.24215511 |
| C | 0.89490144  | 1.83143010  | -0.26124497 |
| C | 1.30432817  | -0.54168190 | -0.25273174 |
| H | -1.04897366 | 2.34035693  | -0.35079099 |
| N | 1.72867143  | 0.79273844  | -0.25719852 |
| H | 2.07831369  | -1.27785158 | -0.23038012 |
| N | -0.41808360 | 1.55886130  | -0.28242170 |
| H | 2.71609754  | 0.97996996  | -0.24635112 |
| S | -2.69513717 | 0.13424344  | -0.14863598 |
| S | 1.45592371  | 3.46179116  | -0.24689626 |
| C | -0.54477936 | -2.25240617 | -0.16793973 |
| H | -1.13628751 | -2.42326887 | 0.72560725  |
| H | -1.16080970 | -2.49748143 | -1.02651134 |
| H | 0.29152095  | -2.94004760 | -0.16044319 |
| O | -5.13170339 | 3.30031746  | 0.11483758  |
| H | -5.44908171 | 2.98277656  | -0.72635724 |
| H | -5.25926680 | 2.58033982  | 0.71969476  |
| O | 4.64271637  | 1.16514654  | -0.22129884 |
| H | 4.73895362  | 1.71001959  | 0.55904482  |
| H | 4.82753166  | 1.74440258  | -0.94844825 |
| O | 4.25337441  | 3.08680963  | 1.85268879  |
| H | 3.40329358  | 3.29144512  | 1.47047093  |

|   |             |            |             |
|---|-------------|------------|-------------|
| H | 4.67955786  | 3.91987541 | 2.00006589  |
| O | -2.31906488 | 3.74897065 | -0.44586685 |
| H | -3.23412934 | 3.77867324 | -0.17666465 |
| H | -1.90707383 | 4.55453944 | -0.16752922 |

${}^3\Pi_8\Pi_8^*/{}^3\Pi_7\Pi_7^*$

|   |             |             |             |
|---|-------------|-------------|-------------|
| C | -0.30728700 | -0.78582300 | -0.27916800 |
| C | -1.29892400 | 0.30219100  | -0.40627700 |
| C | 0.55469200  | 1.87289800  | -0.17564900 |
| C | 1.03396500  | -0.44022100 | -0.11328800 |
| H | -1.44189900 | 2.31550200  | -0.42550900 |
| N | 1.43806300  | 0.83100400  | -0.07295800 |
| H | 1.80210400  | -1.17827600 | -0.01258600 |
| N | -0.80303700 | 1.53800700  | -0.34444000 |
| H | 2.42560900  | 1.01516600  | 0.02100700  |
| S | -2.91114900 | -0.01787300 | -0.61992000 |
| S | 1.11241000  | 3.56416900  | -0.02467500 |
| C | -0.71540200 | -2.22953000 | -0.32456800 |
| H | -1.41651300 | -2.46989500 | 0.46560900  |
| H | -1.19883300 | -2.46738100 | -1.26495500 |
| H | 0.15581100  | -2.86631300 | -0.20769000 |
| O | -4.92848900 | 2.63913900  | 0.16636300  |
| H | -5.58039500 | 2.56434500  | -0.51926300 |
| H | -4.42725700 | 1.82405700  | 0.12846900  |
| O | 4.29832300  | 1.04584800  | 0.22410500  |
| H | 4.53465500  | 1.85313100  | 0.67096300  |
| H | 4.81689200  | 1.04774700  | -0.57057200 |
| O | 4.73635200  | 3.60175800  | 1.36542100  |
| H | 3.94378700  | 4.11290600  | 1.21115300  |
| H | 5.46165500  | 4.21943700  | 1.41717600  |



|   |             |            |             |
|---|-------------|------------|-------------|
| O | -2.49370700 | 3.93775400 | -0.46383700 |
| H | -3.39565300 | 3.66599500 | -0.29130400 |
| H | -2.28567600 | 4.58300300 | 0.19881300  |

## II. aqueous solution

### Snapshot1

${}^1n_8\pi_8^*/{}^1\pi_7\pi_8^*$

|   |             |             |             |
|---|-------------|-------------|-------------|
| C | -0.19636301 | -0.88026406 | -0.16616101 |
| C | -1.13820608 | 0.15850801  | -0.19533801 |
| C | 0.69970705  | 1.70869812  | 0.10738000  |
| C | 1.15826008  | -0.60878504 | -0.00926299 |
| H | -1.20561708 | 2.26831016  | -0.03592200 |
| N | 1.58401311  | 0.72523205  | 0.09811200  |
| H | 1.93298913  | -1.34302109 | 0.01768200  |
| N | -0.57778704 | 1.47350210  | -0.01638300 |
| H | 2.56943518  | 0.93829606  | 0.07265800  |
| S | -2.84113420 | 0.04768900  | -0.39366702 |
| S | 1.28780309  | 3.37794524  | 0.32213502  |
| C | -0.65695705 | -2.30460616 | -0.29518802 |
| H | -1.28213809 | -2.57906218 | 0.54670803  |
| H | -1.25598009 | -2.42478417 | -1.18790808 |
| H | 0.18793101  | -2.98390921 | -0.34059202 |
| O | -4.68980533 | 2.86317020  | -0.11850800 |
| H | -5.10996336 | 2.75704519  | -0.96133606 |
| H | -4.26397730 | 2.02033514  | 0.04102800  |
| O | 4.41241831  | 1.22212608  | -0.20021501 |
| H | 4.68914933  | 1.96384214  | 0.33509202  |
| H | 4.79867034  | 1.34795409  | -1.05845207 |
| O | 4.66942633  | 3.57318325  | 1.39522609  |
| H | 3.81964227  | 3.97445128  | 1.47431910  |

|   |             |            |             |
|---|-------------|------------|-------------|
| H | 5.29051438  | 4.17958130 | 1.76958212  |
| O | -2.04551214 | 3.86805927 | -0.28864502 |
| H | -2.98534621 | 3.67572326 | -0.28949901 |
| H | -1.91888513 | 4.58588933 | 0.31327202  |

${}^1n_8\pi_8^*/{}^1n_7\pi_7^*$

|   |             |             |             |
|---|-------------|-------------|-------------|
| C | -0.20243701 | -0.87566606 | -0.15868601 |
| C | -1.10969307 | 0.25660701  | -0.20162401 |
| C | 0.80171105  | 1.74991512  | -0.12251201 |
| C | 1.12625308  | -0.61035304 | -0.05977600 |
| H | -1.15743908 | 2.29441416  | -0.19961701 |
| N | 1.63208111  | 0.66219604  | -0.00788800 |
| H | 1.86476613  | -1.38809809 | -0.02986200 |
| N | -0.55547504 | 1.49192710  | -0.12575801 |
| H | 2.61928818  | 0.79923205  | -0.11996500 |
| S | -2.77854619 | 0.07649900  | -0.35300902 |
| S | 1.37450110  | 3.35828024  | 0.45248003  |
| C | -0.72039905 | -2.28748816 | -0.21305701 |
| H | -1.34651509 | -2.51720818 | 0.64187404  |
| H | -1.31621509 | -2.45337217 | -1.10223507 |
| H | 0.10626801  | -2.99005921 | -0.22350501 |
| O | -4.77628334 | 3.01170621  | -0.14717901 |
| H | -5.17038437 | 2.90220121  | -1.00258307 |
| H | -4.45561232 | 2.14857615  | 0.09141000  |
| O | 4.50883332  | 1.15463108  | -0.32259402 |
| H | 4.71956634  | 1.84584513  | 0.30292502  |
| H | 4.91355835  | 1.40300310  | -1.14174108 |
| O | 4.60795933  | 3.36814824  | 1.51521911  |
| H | 3.83719127  | 3.25847523  | 2.06016514  |
| H | 4.48272532  | 4.19280129  | 1.06320007  |

|   |             |            |             |
|---|-------------|------------|-------------|
| O | -2.03393914 | 3.94472928 | -0.31167802 |
| H | -2.98055921 | 3.81889527 | -0.25662102 |
| H | -1.81741512 | 4.66153433 | 0.26628601  |

${}^1\pi_7\pi_8^*/{}^1n_7\pi_7^*$

|   |             |             |             |
|---|-------------|-------------|-------------|
| C | -0.20121401 | -0.88787206 | -0.14867901 |
| C | -1.15653708 | 0.20482001  | -0.17669401 |
| C | 0.68367305  | 1.72156412  | 0.10907100  |
| C | 1.12015508  | -0.61611404 | 0.00544700  |
| H | -1.22197608 | 2.25334616  | -0.02515600 |
| N | 1.57983511  | 0.71421204  | 0.10881800  |
| H | 1.88719813  | -1.35990809 | 0.04409100  |
| N | -0.59495804 | 1.45938810  | -0.00814100 |
| H | 2.56542518  | 0.90747806  | 0.06413700  |
| S | -2.85628120 | 0.07016000  | -0.39667502 |
| S | 1.28046209  | 3.39954524  | 0.31841102  |
| C | -0.68162104 | -2.30586616 | -0.27797902 |
| H | -1.31794709 | -2.57311018 | 0.55925403  |
| H | -1.27176909 | -2.42908917 | -1.17485608 |
| H | 0.15421500  | -2.99745021 | -0.31060302 |
| O | -4.67207533 | 2.90806120  | -0.14396100 |
| H | -5.12328036 | 2.80242120  | -0.97112006 |
| H | -4.32860931 | 2.04412614  | 0.05634700  |
| O | 4.40497231  | 1.27037808  | -0.18407501 |
| H | 4.70258734  | 1.98635014  | 0.37209802  |
| H | 4.78195234  | 1.41626010  | -1.04086707 |
| O | 4.64626033  | 3.56853625  | 1.46517210  |
| H | 3.80829727  | 4.00487228  | 1.47720710  |
| H | 5.28464937  | 4.21464230  | 1.73647312  |
| O | -2.01937814 | 3.90989028  | -0.25422002 |

|   |             |            |             |
|---|-------------|------------|-------------|
| H | -2.96180121 | 3.71879426 | -0.27872701 |
| H | -1.91273213 | 4.64659333 | 0.32884002  |

${}^3\pi_8\pi_8^*/{}^3\pi_8\pi_7^*$

|   |             |             |             |
|---|-------------|-------------|-------------|
| C | -0.11521700 | -0.90295106 | -0.14761501 |
| C | -0.96436007 | 0.21964701  | -0.15606101 |
| C | 0.87781806  | 1.74742812  | 0.16809101  |
| C | 1.23915809  | -0.62871504 | -0.02233800 |
| H | -1.02150207 | 2.30889616  | -0.13713200 |
| N | 1.68674212  | 0.67589204  | 0.15701501  |
| H | 1.99469114  | -1.38547709 | 0.01628800  |
| N | -0.43573703 | 1.50132410  | -0.01627700 |
| H | 2.67407919  | 0.85407506  | 0.10814800  |
| S | -2.71288719 | 0.13703000  | -0.33815902 |
| S | 1.42018110  | 3.35120324  | 0.40508103  |
| C | -0.65065604 | -2.30915816 | -0.23259101 |
| H | -1.30540009 | -2.53520318 | 0.60410104  |
| H | -1.21041608 | -2.47847118 | -1.14655208 |
| H | 0.15965001  | -3.02820121 | -0.21457501 |
| O | -4.92966135 | 2.97278421  | -0.10426600 |
| H | -5.24529637 | 2.80569420  | -0.98367607 |
| H | -5.20699937 | 2.22874616  | 0.42818403  |
| O | 4.59596833  | 1.07840707  | -0.18874301 |
| H | 4.76306034  | 1.82183512  | 0.39078902  |
| H | 4.90153635  | 1.34692609  | -1.04517507 |
| O | 4.60642533  | 3.43927724  | 1.49192110  |
| H | 3.93777128  | 3.14890122  | 2.10217615  |
| H | 4.09857829  | 3.94043428  | 0.86226606  |
| O | -2.13148815 | 3.76101027  | -0.27289201 |
| H | -3.06122322 | 3.80465727  | -0.07450100 |

|   |             |            |            |
|---|-------------|------------|------------|
| H | -1.67536112 | 4.44019632 | 0.20675701 |
|---|-------------|------------|------------|

${}^3n_8\pi_8^*/{}^3\pi_7\pi_7^*$

|   |             |             |             |
|---|-------------|-------------|-------------|
| C | -0.17419701 | -0.83401105 | -0.16561301 |
| C | -1.12279807 | 0.27642501  | -0.18932501 |
| C | 0.77065005  | 1.80078613  | -0.07902600 |
| C | 1.15869408  | -0.54107303 | -0.06463800 |
| H | -1.20116608 | 2.30689116  | -0.16255701 |
| N | 1.62518711  | 0.73104405  | 0.01380700  |
| H | 1.91573213  | -1.30163709 | -0.05276800 |
| N | -0.58404404 | 1.51137210  | -0.09823701 |
| H | 2.61624319  | 0.89289506  | -0.05315500 |
| S | -2.77439219 | 0.05248500  | -0.33358902 |
| S | 1.30172109  | 3.41126224  | 0.50656203  |
| C | -0.65447004 | -2.25584316 | -0.24408201 |
| H | -1.28768409 | -2.50687518 | 0.59880304  |
| H | -1.24015308 | -2.41907217 | -1.14007608 |
| H | 0.18837501  | -2.93937421 | -0.25013301 |
| O | -4.81387934 | 2.96316721  | -0.15495401 |
| H | -5.22452337 | 2.89745120  | -1.00732807 |
| H | -4.41730731 | 2.10723015  | 0.00068199  |
| O | 4.50237332  | 1.12288208  | -0.30216802 |
| H | 4.75974134  | 1.80567313  | 0.31732402  |
| H | 4.86845235  | 1.37036009  | -1.13962008 |
| O | 4.63178933  | 3.30989623  | 1.52629611  |
| H | 3.67882426  | 3.33769524  | 1.59470411  |
| H | 4.88400235  | 4.16636629  | 1.20493908  |
| O | -2.09282715 | 3.91204028  | -0.33337902 |
| H | -3.04015022 | 3.81774527  | -0.24221801 |
| H | -1.81246913 | 4.60676933  | 0.24517801  |

## Snapshot2

${}^1\pi_7\pi_8^*/{}^1n_8\pi_8^*$

|   |              |              |              |
|---|--------------|--------------|--------------|
| C | -1.018316074 | -0.596912043 | 0.239787018  |
| C | -1.378282098 | 0.742461054  | 0.248592020  |
| C | 0.996889074  | 1.277247090  | 0.005393999  |
| C | 0.288209023  | -0.981985071 | 0.061993004  |
| N | -0.277152017 | 1.668714120  | 0.116241006  |
| N | 1.293544093  | -0.002534002 | -0.046535006 |
| H | 0.633402047  | -1.992667145 | 0.057758003  |
| H | -0.456276034 | 2.663657192  | 0.131822011  |
| H | 2.256299165  | -0.288332019 | -0.127573009 |
| S | -2.944832210 | 1.427903101  | 0.389579026  |
| S | 2.293178162  | 2.496786179  | -0.029189004 |
| C | -2.062185149 | -1.661217118 | 0.443265032  |
| H | -2.522033183 | -1.550075110 | 1.418373101  |
| H | -2.849677203 | -1.572643112 | -0.290033022 |
| H | -1.624604116 | -2.650190192 | 0.371488027  |
| O | -3.011988216 | 4.720713338  | 1.063113077  |
| H | -3.032585219 | 3.765916272  | 1.126670080  |
| H | -3.767671272 | 4.947028356  | 0.537342041  |
| O | 5.778894414  | 1.214303086  | 0.138823010  |
| H | 5.326736384  | 1.778933126  | 0.752325056  |
| H | 5.882840421  | 1.728924124  | -0.650855049 |
| O | -0.440929032 | 4.582936332  | 0.144538008  |
| H | 0.088415009  | 5.051463364  | 0.775122054  |
| H | -1.350337099 | 4.807822348  | 0.351319024  |
| O | 3.999433286  | -0.877193064 | -0.276102019 |
| H | 4.336846310  | -1.380871098 | -1.003391074 |
| H | 4.681299338  | -0.242002017 | -0.063123003 |

${}^1n_7\pi_7^*/{}^1n_8\pi_8^*$

|   |              |              |              |
|---|--------------|--------------|--------------|
| C | -0.901952066 | -0.588920043 | 0.201037014  |
| C | -1.279699091 | 0.837016059  | 0.209300016  |
| C | 1.076417080  | 1.365727098  | -0.081369008 |
| C | 0.379822029  | -0.899497065 | -0.002097002 |
| N | -0.266975018 | 1.710332122  | 0.076371003  |
| N | 1.373543099  | 0.019299999  | -0.192554012 |
| H | 0.714345052  | -1.919027140 | -0.024763003 |
| H | -0.464548033 | 2.697815192  | 0.094658009  |
| H | 2.319398165  | -0.287687021 | -0.308247023 |
| S | -2.876956206 | 1.363250098  | 0.362625028  |
| S | 2.392674175  | 2.581487184  | 0.088385004  |
| C | -1.938610138 | -1.654467118 | 0.435556030  |
| H | -2.406684174 | -1.543506110 | 1.407486099  |
| H | -2.728740199 | -1.613922118 | -0.301561022 |
| H | -1.482100107 | -2.637937188 | 0.388431029  |
| O | -3.032729218 | 4.764611343  | 0.991553072  |
| H | -3.076879222 | 3.812562273  | 1.054552074  |
| H | -3.786386271 | 5.015591359  | 0.474426036  |
| O | 5.700404411  | 1.312425095  | 0.167398010  |
| H | 5.238583377  | 1.809272128  | 0.829469060  |
| H | 5.697699410  | 1.856033135  | -0.609076044 |
| O | -0.406930028 | 4.645315333  | 0.151632010  |
| H | 0.134968012  | 5.134164370  | 0.754958057  |
| H | -1.312784094 | 4.883851350  | 0.358620024  |
| O | 4.123180295  | -0.910087066 | -0.361449027 |
| H | 4.513625325  | -1.353013096 | -1.102237077 |
| H | 4.757255340  | -0.248305020 | -0.093531005 |

${}^1n_7\pi_7^*/{}^1\pi_7\pi_8^*$

|   |              |              |             |
|---|--------------|--------------|-------------|
| C | -0.911639063 | -0.584451040 | 0.188573011 |
|---|--------------|--------------|-------------|

|                                     |              |              |              |
|-------------------------------------|--------------|--------------|--------------|
| C                                   | -1.297314095 | 0.799220056  | 0.208054015  |
| C                                   | 1.031208076  | 1.370883099  | -0.001404002 |
| C                                   | 0.376719029  | -0.912476068 | 0.019961000  |
| N                                   | -0.215551018 | 1.715316125  | 0.114796008  |
| N                                   | 1.370794097  | 0.088408008  | -0.095190007 |
| H                                   | 0.749604053  | -1.912761137 | -0.000415002 |
| H                                   | -0.420402029 | 2.702271192  | 0.152756009  |
| H                                   | 2.335392166  | -0.187371012 | -0.169154011 |
| S                                   | -2.894668207 | 1.426507100  | 0.388782027  |
| S                                   | 2.338381166  | 2.592228185  | -0.006738998 |
| C                                   | -1.944951142 | -1.655402121 | 0.384992028  |
| H                                   | -2.413970172 | -1.547615113 | 1.355657098  |
| H                                   | -2.727555196 | -1.574235116 | -0.355458026 |
| H                                   | -1.497807109 | -2.640441191 | 0.318014021  |
| O                                   | -3.019599219 | 4.743066341  | 1.014577072  |
| H                                   | -3.027297219 | 3.790734272  | 1.082834079  |
| H                                   | -3.774001270 | 4.955446359  | 0.481534035  |
| O                                   | 5.779341416  | 1.264318089  | 0.177081012  |
| H                                   | 5.246891380  | 1.867696132  | 0.679200047  |
| H                                   | 6.069423435  | 1.749182125  | -0.584780040 |
| O                                   | -0.446873031 | 4.605016332  | 0.121336009  |
| H                                   | 0.093372008  | 5.146291372  | 0.685081048  |
| H                                   | -1.355217098 | 4.830657347  | 0.330308025  |
| O                                   | 4.068649294  | -0.869807062 | -0.285907022 |
| H                                   | 4.390767318  | -1.345172097 | -1.038836076 |
| H                                   | 4.752507345  | -0.238735019 | -0.064930006 |
| ${}^3\Pi_8\Pi_8^*/{}^3\Pi_8\Pi_8^*$ |              |              |              |
| C                                   | -0.788758058 | -0.647744047 | 0.147186011  |
| C                                   | -1.159193086 | 0.729687054  | 0.177210015  |
| C                                   | 1.156903082  | 1.407926099  | 0.021162999  |



|                                     |              |              |              |
|-------------------------------------|--------------|--------------|--------------|
| C                                   | 0.516906036  | -0.907857065 | -0.015577999 |
| N                                   | -0.153378009 | 1.694932122  | 0.086141007  |
| N                                   | 1.467604106  | 0.102679008  | -0.089463007 |
| H                                   | 0.914790065  | -1.900210137 | -0.057303006 |
| H                                   | -0.393087027 | 2.672804190  | 0.079218004  |
| H                                   | 2.434312174  | -0.161565011 | -0.154496013 |
| S                                   | -2.781152200 | 1.333688098  | 0.458623031  |
| S                                   | 2.339594167  | 2.639542188  | 0.079878004  |
| C                                   | -1.800855130 | -1.742726125 | 0.325454025  |
| H                                   | -2.295530165 | -1.661282122 | 1.288755092  |
| H                                   | -2.570098183 | -1.710523123 | -0.436378033 |
| H                                   | -1.322212096 | -2.713034197 | 0.274622021  |
| O                                   | -3.212243234 | 5.048794364  | 1.007427072  |
| H                                   | -3.358050240 | 4.143544301  | 1.241235091  |
| H                                   | -3.931407281 | 5.290616381  | 0.439172031  |
| O                                   | 5.527427396  | 1.352243095  | 0.203104012  |
| H                                   | 4.701495340  | 1.796367130  | 0.386134029  |
| H                                   | 5.864675422  | 1.778441129  | -0.572638042 |
| O                                   | -0.649734045 | 4.528952325  | 0.020554001  |
| H                                   | 0.146739010  | 4.912928354  | 0.363851026  |
| H                                   | -1.394025100 | 4.986214360  | 0.397878028  |
| O                                   | 4.151819299  | -0.978230072 | -0.284980020 |
| H                                   | 4.488041325  | -1.330126095 | -1.097109080 |
| H                                   | 4.768593343  | -0.290882019 | -0.030217000 |
| ${}^3\Pi_8\Pi_8^*/{}^3\Pi_7\Pi_7^*$ |              |              |              |
| C                                   | -0.860355062 | -0.582399044 | 0.176530011  |
| C                                   | -1.240877087 | 0.830256058  | 0.191597016  |
| C                                   | 1.101453080  | 1.420112104  | -0.123657007 |
| C                                   | 0.435037029  | -0.869979060 | -0.036058000 |
| N                                   | -0.223968016 | 1.724637122  | 0.069047005  |

|   |              |              |              |
|---|--------------|--------------|--------------|
| N | 1.393966102  | 0.082932008  | -0.221405015 |
| H | 0.794304057  | -1.879667138 | -0.062648003 |
| H | -0.436561033 | 2.710486193  | 0.093041008  |
| H | 2.348770169  | -0.204346012 | -0.341450027 |
| S | -2.840484204 | 1.356347098  | 0.325223024  |
| S | 2.345001168  | 2.591428186  | 0.384228028  |
| C | -1.880997135 | -1.662000120 | 0.409167030  |
| H | -2.347415169 | -1.554619113 | 1.384474101  |
| H | -2.671237190 | -1.628317115 | -0.326218025 |
| H | -1.416141100 | -2.639876188 | 0.359645025  |
| O | -3.154433228 | 4.793802347  | 0.969206071  |
| H | -3.191740229 | 3.843259279  | 0.993108070  |
| H | -3.929893283 | 5.074812363  | 0.504002038  |
| O | 5.632335404  | 1.233024091  | 0.222255016  |
| H | 4.875050349  | 1.730166124  | 0.517433038  |
| H | 5.955926430  | 1.696125120  | -0.537987039 |
| O | -0.522156035 | 4.670925337  | 0.143301009  |
| H | 0.057255005  | 5.003960361  | 0.826095058  |
| H | -1.401280099 | 4.960165356  | 0.373642028  |
| O | 4.102470293  | -0.993385073 | -0.390509029 |
| H | 4.497159324  | -1.418950100 | -1.138816084 |
| H | 4.743529339  | -0.350063027 | -0.092868009 |

### Snapshot3

${}^1\pi_7\pi_8^*/{}^1n_8\pi_8^*$

|   |              |              |             |
|---|--------------|--------------|-------------|
| C | -0.228664014 | -0.864500060 | 0.118316011 |
| C | -0.720228053 | 0.448473030  | 0.081186008 |
| C | 1.582466113  | 1.204125087  | 0.069001004 |
| C | 1.140717084  | -1.121072083 | 0.135211010 |
| N | 0.302006023  | 1.462357107  | 0.070626007 |

|                                 |              |              |              |
|---------------------------------|--------------|--------------|--------------|
| N                               | 2.032550144  | -0.038633003 | 0.102647009  |
| H                               | 1.591499116  | -2.088151152 | 0.179393014  |
| H                               | 0.003757000  | 2.432504177  | 0.032989005  |
| H                               | 3.023456218  | -0.220061015 | 0.053311004  |
| S                               | -2.350387171 | 0.978011072  | -0.005978999 |
| S                               | 2.753134196  | 2.546994183  | 0.002718003  |
| C                               | -1.195602084 | -2.014428146 | 0.133681011  |
| H                               | -1.750703128 | -2.030420147 | 1.064684077  |
| H                               | -1.917000138 | -1.913702136 | -0.661926045 |
| H                               | -0.675878047 | -2.959365212 | 0.019575002  |
| O                               | 4.792242343  | -0.773859056 | -0.142152011 |
| H                               | 5.318251382  | 0.012821002  | -0.291556021 |
| H                               | 5.060060362  | -1.397266099 | -0.803866057 |
| O                               | -0.415219029 | 4.256850305  | -0.042654004 |
| H                               | -1.325305095 | 4.280850308  | 0.266063018  |
| H                               | 0.042141004  | 4.940819355  | 0.434040033  |
| O                               | 6.138529443  | 1.699205123  | -0.614792042 |
| H                               | 5.581122403  | 2.415750176  | -0.349713024 |
| H                               | 6.986045501  | 1.866435135  | -0.237698017 |
| O                               | -2.954493214 | 3.998217290  | 1.156625084  |
| H                               | -3.714827267 | 4.145989301  | 0.612763044  |
| H                               | -2.821147205 | 3.050041220  | 1.125227082  |
| ${}^1n_7\pi_7^*/{}^1n_8\pi_8^*$ |              |              |              |
| C                               | -0.223089015 | -0.878660065 | 0.099311007  |
| C                               | -0.683070047 | 0.492670036  | 0.069199006  |
| C                               | 1.646156119  | 1.209257085  | 0.208880013  |
| C                               | 1.124473079  | -1.105628082 | 0.120237009  |
| N                               | 0.281023018  | 1.464107107  | 0.099906008  |
| N                               | 2.039278146  | -0.102026009 | 0.148451009  |
| H                               | 1.540613109  | -2.093524153 | 0.128675010  |

|   |              |              |              |
|---|--------------|--------------|--------------|
| H | -0.023836001 | 2.418533172  | 0.054470003  |
| H | 3.013325215  | -0.341543025 | 0.105070005  |
| S | -2.301225165 | 0.902243066  | -0.000394999 |
| S | 2.803026202  | 2.547087186  | -0.196222014 |
| C | -1.208785085 | -2.018719144 | 0.108550007  |
| H | -1.787394130 | -2.038264147 | 1.024398072  |
| H | -1.911336136 | -1.948124142 | -0.711250053 |
| H | -0.682753049 | -2.962677216 | 0.023257001  |
| O | 4.842623346  | -0.898939063 | -0.119278007 |
| H | 5.335952382  | -0.090975004 | -0.245104017 |
| H | 5.150695370  | -1.500088106 | -0.783973057 |
| O | -0.413495028 | 4.326863312  | -0.044215003 |
| H | -1.294307093 | 4.394862319  | 0.325703025  |
| H | 0.090161008  | 5.030999360  | 0.341197022  |
| O | 6.070043435  | 1.685316120  | -0.382720026 |
| H | 5.592177402  | 2.345615167  | -0.871784063 |
| H | 6.180649444  | 2.030736145  | 0.497335035  |
| O | -2.982641216 | 4.063617295  | 1.144986084  |
| H | -3.733060270 | 4.225479307  | 0.587650044  |
| H | -2.874210204 | 3.117243222  | 1.136945083  |

${}^1\pi_7\pi_8^*/{}^1n_7\pi_7^*$

|   |              |              |              |
|---|--------------|--------------|--------------|
| C | -0.255147018 | -0.906145066 | 0.114610008  |
| C | -0.704797049 | 0.466080032  | 0.074626004  |
| C | 1.586438112  | 1.172386083  | 0.056268004  |
| C | 1.074617078  | -1.158942081 | 0.137156012  |
| N | 0.298831023  | 1.419673104  | 0.030188001  |
| N | 2.017604146  | -0.102975009 | 0.144799009  |
| H | 1.500783107  | -2.140411152 | 0.151365008  |
| H | 0.015611999  | 2.388606172  | -0.035560002 |
| H | 2.995734214  | -0.321873025 | 0.115927008  |

|                                   |              |              |              |
|-----------------------------------|--------------|--------------|--------------|
| S                                 | -2.345779169 | 0.990979074  | -0.008288001 |
| S                                 | 2.774243198  | 2.496486178  | -0.075709008 |
| C                                 | -1.263162090 | -2.019274145 | 0.125878012  |
| H                                 | -1.831595131 | -2.010210143 | 1.047540073  |
| H                                 | -1.967924140 | -1.912647136 | -0.689176049 |
| H                                 | -0.772400056 | -2.980585214 | 0.035439000  |
| O                                 | 4.832382348  | -0.828637061 | -0.131788011 |
| H                                 | 5.318202385  | -0.026140001 | -0.316607023 |
| H                                 | 5.161952372  | -1.486488108 | -0.726261050 |
| O                                 | -0.367487024 | 4.244056307  | -0.023270003 |
| H                                 | -1.255233089 | 4.306988309  | 0.330014025  |
| H                                 | 0.105350009  | 4.988613358  | 0.317531025  |
| O                                 | 6.025219433  | 1.753536126  | -0.450205032 |
| H                                 | 5.712077410  | 2.456590177  | -1.005392073 |
| H                                 | 6.102691438  | 2.114341150  | 0.423010032  |
| O                                 | -2.916378212 | 4.060505294  | 1.180118082  |
| H                                 | -3.659724263 | 4.211654302  | 0.611733043  |
| H                                 | -2.830658202 | 3.111259223  | 1.219624085  |
| ${}^3\pi_8\pi_8^*/{}^3n_8\pi_8^*$ |              |              |              |
| C                                 | -0.143534011 | -0.853325064 | 0.075244004  |
| C                                 | -0.567973043 | 0.459602035  | 0.047349002  |
| C                                 | 1.708785125  | 1.276965092  | -0.023643999 |
| C                                 | 1.244413092  | -1.086790076 | 0.028974000  |
| N                                 | 0.385897027  | 1.488546105  | -0.043559003 |
| N                                 | 2.115446152  | 0.007217999  | 0.019950003  |
| H                                 | 1.702737121  | -2.049405148 | 0.088401007  |
| H                                 | 0.066302004  | 2.440749176  | -0.141484010 |
| H                                 | 3.099912223  | -0.193305015 | -0.000541999 |
| S                                 | -2.238138162 | 0.977483070  | -0.037353003 |
| S                                 | 2.789435200  | 2.612698190  | -0.099333010 |

|                                   |              |              |              |
|-----------------------------------|--------------|--------------|--------------|
| C                                 | -1.101579077 | -2.013312143 | 0.138147007  |
| H                                 | -1.702155122 | -1.979242140 | 1.037325074  |
| H                                 | -1.777867130 | -2.013048147 | -0.707945050 |
| H                                 | -0.557784042 | -2.947725212 | 0.139553010  |
| O                                 | 4.817212345  | -1.026792076 | -0.074057007 |
| H                                 | 5.357202383  | -0.233996015 | -0.084700005 |
| H                                 | 5.096395365  | -1.541080113 | -0.815969061 |
| O                                 | -0.528236038 | 4.188981301  | -0.085350004 |
| H                                 | -1.319312093 | 4.366129312  | 0.418320029  |
| H                                 | 0.154386012  | 4.778639345  | 0.200782014  |
| O                                 | 5.917834426  | 1.524553108  | -0.303671021 |
| H                                 | 5.051432365  | 1.927027136  | -0.345365023 |
| H                                 | 6.363316456  | 1.939133140  | 0.419195029  |
| O                                 | -3.131370223 | 4.162111299  | 1.206060087  |
| H                                 | -3.835221277 | 4.358258314  | 0.600268042  |
| H                                 | -3.311497237 | 3.283778234  | 1.503808106  |
| ${}^3\pi_7\pi_7^*/{}^3n_8\pi_8^*$ |              |              |              |
| C                                 | -0.148250012 | -0.842190058 | 0.116310011  |
| C                                 | -0.637994046 | 0.522166037  | 0.106341010  |
| C                                 | 1.674926121  | 1.297803091  | 0.245100016  |
| C                                 | 1.184108084  | -1.032611073 | 0.110121008  |
| N                                 | 0.307333023  | 1.514997109  | 0.138072012  |
| N                                 | 2.084163151  | -0.008034001 | 0.142068010  |
| H                                 | 1.620177115  | -2.012506143 | 0.099307006  |
| H                                 | -0.004791001 | 2.471152177  | 0.085494009  |
| H                                 | 3.062257219  | -0.233789016 | 0.123036007  |
| S                                 | -2.259122162 | 0.909819064  | 0.072374006  |
| S                                 | 2.753614197  | 2.592412185  | -0.372238025 |
| C                                 | -1.105862079 | -2.001765146 | 0.122944010  |
| H                                 | -1.671850120 | -2.045722149 | 1.047835073  |

|   |              |              |              |
|---|--------------|--------------|--------------|
| H | -1.818595130 | -1.935988139 | -0.688646051 |
| H | -0.557413041 | -2.930943213 | 0.025829004  |
| O | 4.826346346  | -0.981960073 | -0.046201005 |
| H | 5.386721388  | -0.209247014 | -0.107156006 |
| H | 5.111294367  | -1.571133116 | -0.731982054 |
| O | -0.512951039 | 4.332733311  | -0.052376006 |
| H | -1.377206101 | 4.421427318  | 0.348295025  |
| H | 0.020232002  | 5.016403361  | 0.329415023  |
| O | 6.021425434  | 1.576431111  | -0.307748025 |
| H | 5.204398373  | 1.983699141  | -0.619728044 |
| H | 6.187166447  | 1.953587140  | 0.574661039  |
| O | -3.073432220 | 4.048310293  | 1.163918083  |
| H | -3.808881274 | 4.183398301  | 0.570401040  |
| H | -2.936054213 | 3.091896225  | 1.205233089  |

## Cartesian coordinates of LIIC paths

### I. gas phase

#### FC point to minimum ${}^1n_7\pi_7^*$

point 1

|   |            |            |            |
|---|------------|------------|------------|
| C | -0.6238126 | -1.4078701 | 0.0033321  |
| C | -1.0340770 | -0.0016972 | 0.0137618  |
| C | 1.3406632  | 0.6464128  | 0.0143521  |
| C | 0.6992509  | -1.6700700 | -0.0015239 |
| H | 1.0903011  | -2.6679507 | -0.0094376 |
| N | -0.0010033 | 0.8992227  | 0.0195339  |
| H | -0.2513316 | 1.8661158  | 0.0262933  |
| N | 1.6514721  | -0.6713499 | 0.0028358  |
| H | 2.6199002  | -0.8991445 | 0.0001722  |
| S | -2.5968087 | 0.5213051  | 0.0188520  |
| S | 2.4932361  | 1.8709846  | 0.0217100  |

|   |            |            |            |
|---|------------|------------|------------|
| C | -1.6515927 | -2.5070450 | -0.0015674 |
| H | -2.2865236 | -2.4483704 | 0.8740282  |
| H | -2.2922407 | -2.4353838 | -0.8719781 |
| H | -1.1656480 | -3.4757779 | -0.0103643 |

point 2

|   |            |            |            |
|---|------------|------------|------------|
| C | -0.6232413 | -1.4070052 | 0.0033556  |
| C | -1.0347427 | 0.0003022  | 0.0138304  |
| C | 1.3391693  | 0.6451452  | 0.0143406  |
| C | 0.7000198  | -1.6705470 | -0.0015618 |
| H | 1.0885932  | -2.6695140 | -0.0095103 |
| N | -0.0048900 | 0.9017594  | 0.0195473  |
| H | -0.2587170 | 1.8674463  | 0.0261914  |
| N | 1.6545527  | -0.6754137 | 0.0027568  |
| H | 2.6216992  | -0.9069099 | 0.0001823  |
| S | -2.5994010 | 0.5202259  | 0.0189624  |
| S | 2.5023245  | 1.8794531  | 0.0218053  |
| C | -1.6509809 | -2.5063876 | -0.0015642 |
| H | -2.2862030 | -2.4485430 | 0.8739239  |
| H | -2.2918226 | -2.4356115 | -0.8719557 |
| H | -1.1645748 | -3.4750190 | -0.0103041 |

point 3

|   |            |            |            |
|---|------------|------------|------------|
| C | -0.6226658 | -1.4061309 | 0.0033791  |
| C | -1.0354105 | 0.0023089  | 0.0138989  |
| C | 1.3376602  | 0.6438630  | 0.0143289  |
| C | 0.7007923  | -1.6710158 | -0.0015996 |
| H | 1.0868855  | -2.6710631 | -0.0095825 |
| N | -0.0087800 | 0.9042966  | 0.0195602  |
| H | -0.2661026 | 1.8687641  | 0.0260894  |



|   |            |            |            |
|---|------------|------------|------------|
| N | 1.6576289  | -0.6794782 | 0.0026775  |
| H | 2.6234785  | -0.9146746 | 0.0001917  |
| S | -2.6019912 | 0.5191428  | 0.0190730  |
| S | 2.5114120  | 1.8878926  | 0.0219015  |
| C | -1.6503612 | -2.5057243 | -0.0015609 |
| H | -2.2858740 | -2.4487116 | 0.8738193  |
| H | -2.2913960 | -2.4358356 | -0.8719329 |
| H | -1.1634906 | -3.4742524 | -0.0102436 |

point 4

|   |            |            |            |
|---|------------|------------|------------|
| C | -0.6220862 | -1.4052472 | 0.0034027  |
| C | -1.0360805 | 0.0043229  | 0.0139672  |
| C | 1.3361357  | 0.6425662  | 0.0143168  |
| C | 0.7015684  | -1.6714765 | -0.0016372 |
| H | 1.0851782  | -2.6725981 | -0.0096542 |
| N | -0.0126734 | 0.9068343  | 0.0195727  |
| H | -0.2734883 | 1.8700692  | 0.0259873  |
| N | 1.6607007  | -0.6835434 | 0.0025980  |
| H | 2.6252379  | -0.9224386 | 0.0002002  |
| S | -2.6045793 | 0.5180557  | 0.0191836  |
| S | 2.5204986  | 1.8963030  | 0.0219986  |
| C | -1.6497337 | -2.5050552 | -0.0015575 |
| H | -2.2855366 | -2.4488765 | 0.8737145  |
| H | -2.2909607 | -2.4360562 | -0.8719099 |
| H | -1.1623954 | -3.4734781 | -0.0101827 |

point 5

|   |            |            |           |
|---|------------|------------|-----------|
| C | -0.6215025 | -1.4043543 | 0.0034263 |
| C | -1.0367527 | 0.0063441  | 0.0140354 |
| C | 1.3345958  | 0.6412549  | 0.0143045 |

|   |            |            |            |
|---|------------|------------|------------|
| C | 0.7023481  | -1.6719292 | -0.0016748 |
| H | 1.0834712  | -2.6741190 | -0.0097254 |
| N | -0.0165702 | 0.9093725  | 0.0195848  |
| H | -0.2808742 | 1.8713614  | 0.0258850  |
| N | 1.6637680  | -0.6876093 | 0.0025182  |
| H | 2.6269774  | -0.9302016 | 0.0002080  |
| S | -2.6071653 | 0.5169648  | 0.0192944  |
| S | 2.5295844  | 1.9046842  | 0.0220967  |
| C | -1.6490982 | -2.5043802 | -0.0015540 |
| H | -2.2851907 | -2.4490374 | 0.8736093  |
| H | -2.2905168 | -2.4362731 | -0.8718867 |
| H | -1.1612891 | -3.4726962 | -0.0101216 |

point 6

|   |            |            |            |
|---|------------|------------|------------|
| C | -0.6209145 | -1.4034520 | 0.0034499  |
| C | -1.0374271 | 0.0083725  | 0.0141034  |
| C | 1.3330405  | 0.6399290  | 0.0142919  |
| C | 0.7031315  | -1.6723737 | -0.0017122 |
| H | 1.0817646  | -2.6756256 | -0.0097962 |
| N | -0.0204702 | 0.9119111  | 0.0195964  |
| H | -0.2882600 | 1.8726407  | 0.0257825  |
| N | 1.6668307  | -0.6916759 | 0.0024382  |
| H | 2.6286968  | -0.9379636 | 0.0002150  |
| S | -2.6097490 | 0.5158699  | 0.0194052  |
| S | 2.5386692  | 1.9130363  | 0.0221956  |
| C | -1.6484549 | -2.5036994 | -0.0015505 |
| H | -2.2848363 | -2.4491945 | 0.8735039  |
| H | -2.2900642 | -2.4364865 | -0.8718631 |
| H | -1.1601717 | -3.4719067 | -0.0100601 |

point 7

|   |            |            |            |
|---|------------|------------|------------|
| C | -0.6203224 | -1.4025405 | 0.0034735  |
| C | -1.0381037 | 0.0104081  | 0.0141713  |
| C | 1.3314698  | 0.6385885  | 0.0142790  |
| C | 0.7039185  | -1.6728101 | -0.0017494 |
| H | 1.0800584  | -2.6771181 | -0.0098665 |
| N | -0.0243735 | 0.9144501  | 0.0196076  |
| H | -0.2956458 | 1.8739071  | 0.0256798  |
| N | 1.6698888  | -0.6957430 | 0.0023580  |
| H | 2.6303961  | -0.9457245 | 0.0002212  |
| S | -2.6123304 | 0.5147710  | 0.0195162  |
| S | 2.5477530  | 1.9213592  | 0.0222955  |
| C | -1.6478036 | -2.5030127 | -0.0015469 |
| H | -2.2844734 | -2.4493478 | 0.8733982  |
| H | -2.2896029 | -2.4366963 | -0.8718392 |
| H | -1.1590434 | -3.4711095 | -0.0099982 |

point 8

|   |            |            |            |
|---|------------|------------|------------|
| C | -0.6197262 | -1.4016197 | 0.0034972  |
| C | -1.0387825 | 0.0124508  | 0.0142391  |
| C | 1.3298836  | 0.6372335  | 0.0142659  |
| C | 0.7047091  | -1.6732384 | -0.0017866 |
| H | 1.0783526  | -2.6785964 | -0.0099363 |
| N | -0.0282801 | 0.9169895  | 0.0196184  |
| H | -0.3030315 | 1.8751606  | 0.0255770  |
| N | 1.6729421  | -0.6998107 | 0.0022775  |
| H | 2.6320752  | -0.9534839 | 0.0002265  |
| S | -2.6149094 | 0.5136682  | 0.0196272  |
| S | 2.5568358  | 1.9296528  | 0.0223963  |
| C | -1.6471445 | -2.5023202 | -0.0015432 |

|   |            |            |            |
|---|------------|------------|------------|
| H | -2.2841020 | -2.4494972 | 0.8732922  |
| H | -2.2891330 | -2.4369026 | -0.8718150 |
| H | -1.1579039 | -3.4703046 | -0.0099360 |

point 9

|   |            |            |            |
|---|------------|------------|------------|
| C | -0.6191257 | -1.4006896 | 0.0035209  |
| C | -1.0394634 | 0.0145006  | 0.0143067  |
| C | 1.3282819  | 0.6358640  | 0.0142524  |
| C | 0.7055034  | -1.6736586 | -0.0018237 |
| H | 1.0766473  | -2.6800605 | -0.0100056 |
| N | -0.0321900 | 0.9195291  | 0.0196287  |
| H | -0.3104169 | 1.8764011  | 0.0254740  |
| N | 1.6759906  | -0.7038789 | 0.0021968  |
| H | 2.6337340  | -0.9612419 | 0.0002311  |
| S | -2.6174861 | 0.5125613  | 0.0197383  |
| S | 2.5659176  | 1.9379173  | 0.0224980  |
| C | -1.6464774 | -2.5016219 | -0.0015395 |
| H | -2.2837221 | -2.4496428 | 0.8731859  |
| H | -2.2886543 | -2.4371053 | -0.8717905 |
| H | -1.1567535 | -3.4694921 | -0.0098735 |

point 10

|   |            |            |            |
|---|------------|------------|------------|
| C | -0.6185210 | -1.3997503 | 0.0035447  |
| C | -1.0401466 | 0.0165576  | 0.0143741  |
| C | 1.3266647  | 0.6344800  | 0.0142386  |
| C | 0.7063013  | -1.6740707 | -0.0018606 |
| H | 1.0749425  | -2.6815104 | -0.0100744 |
| N | -0.0361030 | 0.9220691  | 0.0196385  |
| H | -0.3178021 | 1.8776285  | 0.0253709  |
| N | 1.6790342  | -0.7079477 | 0.0021158  |

|   |            |            |            |
|---|------------|------------|------------|
| H | 2.6353723  | -0.9689983 | 0.0002347  |
| S | -2.6200602 | 0.5114503  | 0.0198495  |
| S | 2.5749984  | 1.9461525  | 0.0226007  |
| C | -1.6458024 | -2.5009178 | -0.0015356 |
| H | -2.2833336 | -2.4497846 | 0.8730794  |
| H | -2.2881669 | -2.4373045 | -0.8717658 |
| H | -1.1555920 | -3.4686720 | -0.0098106 |

### FC point and minimum ${}^1\Pi_7\Pi_8^*$

point 1

|   |            |            |            |
|---|------------|------------|------------|
| C | -0.6238126 | -1.4078701 | 0.0033321  |
| C | -1.0340770 | -0.0016972 | 0.0137618  |
| C | 1.3406632  | 0.6464128  | 0.0143521  |
| C | 0.6992509  | -1.6700700 | -0.0015239 |
| H | 1.0903011  | -2.6679507 | -0.0094376 |
| N | -0.0010033 | 0.8992227  | 0.0195339  |
| H | -0.2513316 | 1.8661158  | 0.0262933  |
| N | 1.6514721  | -0.6713499 | 0.0028358  |
| H | 2.6199002  | -0.8991445 | 0.0001722  |
| S | -2.5968087 | 0.5213051  | 0.0188520  |
| S | 2.4932361  | 1.8709846  | 0.0217100  |
| C | -1.6515927 | -2.5070450 | -0.0015674 |
| H | -2.2865236 | -2.4483704 | 0.8740282  |
| H | -2.2922407 | -2.4353838 | -0.8719781 |
| H | -1.1656480 | -3.4757779 | -0.0103643 |

point 2

|   |            |            |           |
|---|------------|------------|-----------|
| C | -0.6244509 | -1.4068371 | 0.0033800 |
| C | -1.0381980 | -0.0085221 | 0.0137691 |
| C | 1.3342942  | 0.6418462  | 0.0142274 |

|   |            |            |            |
|---|------------|------------|------------|
| C | 0.7019810  | -1.6749906 | -0.0017439 |
| H | 1.0947403  | -2.6717267 | -0.0095781 |
| N | 0.0007157  | 0.8993324  | 0.0193185  |
| H | -0.2538818 | 1.8652749  | 0.0260883  |
| N | 1.6537079  | -0.6706453 | 0.0028636  |
| H | 2.6229196  | -0.8951782 | 0.0005022  |
| S | -2.6013764 | 0.5314994  | 0.0197173  |
| S | 2.4967945  | 1.8730422  | 0.0216631  |
| C | -1.6511946 | -2.5069132 | -0.0016269 |
| H | -2.2865911 | -2.4465983 | 0.8735250  |
| H | -2.2916476 | -2.4340529 | -0.8720985 |
| H | -1.1660274 | -3.4761495 | -0.0100071 |

point 3

|   |            |            |            |
|---|------------|------------|------------|
| C | -0.6251110 | -1.4058011 | 0.0034280  |
| C | -1.0423124 | -0.0153641 | 0.0137762  |
| C | 1.3279060  | 0.6372906  | 0.0141030  |
| C | 0.7046732  | -1.6798868 | -0.0019676 |
| H | 1.0991769  | -2.6754603 | -0.0097228 |
| N | 0.0024370  | 0.8994201  | 0.0190998  |
| H | -0.2564131 | 1.8643968  | 0.0258788  |
| N | 1.6558586  | -0.6698822 | 0.0028928  |
| H | 2.6258415  | -0.8911569 | 0.0008348  |
| S | -2.6057646 | 0.5417034  | 0.0205832  |
| S | 2.5003899  | 1.8750518  | 0.0216215  |
| C | -1.6507957 | -2.5067977 | -0.0016845 |
| H | -2.2866576 | -2.4448544 | 0.8730212  |
| H | -2.2910549 | -2.4327503 | -0.8722156 |
| H | -1.1663884 | -3.4765274 | -0.0096486 |

point 4

|   |            |            |            |
|---|------------|------------|------------|
| C | -0.6257930 | -1.4047622 | 0.0034760  |
| C | -1.0464203 | -0.0222231 | 0.0137832  |
| C | 1.3214989  | 0.6327467  | 0.0139789  |
| C | 0.7073279  | -1.6847584 | -0.0021949 |
| H | 1.1036109  | -2.6791510 | -0.0098718 |
| N | 0.0041606  | 0.8994859  | 0.0188778  |
| H | -0.2589254 | 1.8634815  | 0.0256648  |
| N | 1.6579240  | -0.6690606 | 0.0029232  |
| H | 2.6286656  | -0.8870806 | 0.0011701  |
| S | -2.6099730 | 0.5519153  | 0.0214492  |
| S | 2.5040228  | 1.8770132  | 0.0215853  |
| C | -1.6503963 | -2.5066985 | -0.0017403 |
| H | -2.2867234 | -2.4431390 | 0.8725167  |
| H | -2.2904630 | -2.4314757 | -0.8723292 |
| H | -1.1667309 | -3.4769118 | -0.0092889 |

point 5

|   |            |            |            |
|---|------------|------------|------------|
| C | -0.6264975 | -1.4037203 | 0.0035241  |
| C | -1.0505216 | -0.0290988 | 0.0137901  |
| C | 1.3150731  | 0.6282152  | 0.0138549  |
| C | 0.7099451  | -1.6896050 | -0.0024260 |
| H | 1.1080423  | -2.6827984 | -0.0100251 |
| N | 0.0058869  | 0.8995297  | 0.0186527  |
| H | -0.2614186 | 1.8625293  | 0.0254464  |
| N | 1.6599040  | -0.6681804 | 0.0029548  |
| H | 2.6313919  | -0.8829498 | 0.0015080  |
| S | -2.6140017 | 0.5621330  | 0.0223150  |
| S | 2.5076940  | 1.8789265  | 0.0215547  |
| C | -1.6499965 | -2.5066155 | -0.0017941 |

|   |            |            |            |
|---|------------|------------|------------|
| H | -2.2867886 | -2.4414519 | 0.8720118  |
| H | -2.2898720 | -2.4302294 | -0.8724394 |
| H | -1.1670553 | -3.4773026 | -0.0089279 |

point 6

|   |            |            |            |
|---|------------|------------|------------|
| C | -0.6272247 | -1.4026754 | 0.0035724  |
| C | -1.0546162 | -0.0359912 | 0.0137971  |
| C | 1.3086289  | 0.6236969  | 0.0137311  |
| C | 0.7125250  | -1.6944261 | -0.0026609 |
| H | 1.1124709  | -2.6864018 | -0.0101828 |
| N | 0.0076159  | 0.8995517  | 0.0184245  |
| H | -0.2638927 | 1.8615404  | 0.0252236  |
| N | 1.6617986  | -0.6672416 | 0.0029877  |
| H | 2.6340203  | -0.8787644 | 0.0018484  |
| S | -2.6178507 | 0.5723547  | 0.0231802  |
| S | 2.5114040  | 1.8807917  | 0.0215296  |
| C | -1.6495966 | -2.5065489 | -0.0018459 |
| H | -2.2868535 | -2.4397934 | 0.8715064  |
| H | -2.2892824 | -2.4290113 | -0.8725459 |
| H | -1.1673614 | -3.4776997 | -0.0085656 |

point 7

|   |            |            |            |
|---|------------|------------|------------|
| C | -0.6279749 | -1.4016274 | 0.0036207  |
| C | -1.0587040 | -0.0429000 | 0.0138043  |
| C | 1.3021664  | 0.6191926  | 0.0136075  |
| C | 0.7150677  | -1.6992214 | -0.0028995 |
| H | 1.1168967  | -2.6899608 | -0.0103449 |
| N | 0.0093479  | 0.8995519  | 0.0181933  |
| H | -0.2663476 | 1.8605150  | 0.0249966  |
| N | 1.6636077  | -0.6662442 | 0.0030217  |



|   |            |            |            |
|---|------------|------------|------------|
| H | 2.6365507  | -0.8745247 | 0.0021913  |
| S | -2.6215199 | 0.5825784  | 0.0240446  |
| S | 2.5151535  | 1.8826085  | 0.0215104  |
| C | -1.6491966 | -2.5064984 | -0.0018958 |
| H | -2.2869184 | -2.4381635 | 0.8710007  |
| H | -2.2886944 | -2.4278215 | -0.8726487 |
| H | -1.1676494 | -3.4781031 | -0.0082019 |

point 8

|   |            |            |            |
|---|------------|------------|------------|
| C | -0.6287485 | -1.4005763 | 0.0036691  |
| C | -1.0627851 | -0.0498250 | 0.0138116  |
| C | 1.2956861  | 0.6147031  | 0.0134839  |
| C | 0.7175736  | -1.7039906 | -0.0031421 |
| H | 1.1213195  | -2.6934747 | -0.0105115 |
| N | 0.0110830  | 0.8995304  | 0.0179592  |
| H | -0.2687832 | 1.8594532  | 0.0247655  |
| N | 1.6653312  | -0.6651881 | 0.0030568  |
| H | 2.6389832  | -0.8702310 | 0.0025366  |
| S | -2.6250094 | 0.5928023  | 0.0249076  |
| S | 2.5189433  | 1.8843771  | 0.0214969  |
| C | -1.6487969 | -2.5064641 | -0.0019435 |
| H | -2.2869834 | -2.4365622 | 0.8704947  |
| H | -2.2881084 | -2.4266598 | -0.8727477 |
| H | -1.1679194 | -3.4785128 | -0.0078370 |

point 9

|   |            |            |            |
|---|------------|------------|------------|
| C | -0.6295459 | -1.3995220 | 0.0037175  |
| C | -1.0668592 | -0.0567662 | 0.0138191  |
| C | 1.2891881  | 0.6102291  | 0.0133605  |
| C | 0.7200426  | -1.7087332 | -0.0033885 |

|   |            |            |            |
|---|------------|------------|------------|
| H | 1.1257393  | -2.6969432 | -0.0106827 |
| N | 0.0128213  | 0.8994873  | 0.0177223  |
| H | -0.2711995 | 1.8583553  | 0.0245302  |
| N | 1.6669689  | -0.6640733 | 0.0030930  |
| H | 2.6413176  | -0.8658834 | 0.0028842  |
| S | -2.6283193 | 0.6030245  | 0.0257689  |
| S | 2.5227738  | 1.8860972  | 0.0214895  |
| C | -1.6483975 | -2.5064459 | -0.0019891 |
| H | -2.2870489 | -2.4349895 | 0.8699885  |
| H | -2.2875245 | -2.4255264 | -0.8728428 |
| H | -1.1681713 | -3.4789288 | -0.0074706 |

point 10

|   |            |            |            |
|---|------------|------------|------------|
| C | -0.6303673 | -1.3984645 | 0.0037661  |
| C | -1.0709265 | -0.0637232 | 0.0138270  |
| C | 1.2826727  | 0.6057715  | 0.0132371  |
| C | 0.7224750  | -1.7134488 | -0.0036389 |
| H | 1.1301560  | -2.7003655 | -0.0108585 |
| N | 0.0145632  | 0.8994226  | 0.0174826  |
| H | -0.2735964 | 1.8572215  | 0.0242910  |
| N | 1.6685210  | -0.6628999 | 0.0031302  |
| H | 2.6435539  | -0.8614821 | 0.0032341  |
| S | -2.6314498 | 0.6132430  | 0.0266283  |
| S | 2.5266458  | 1.8877689  | 0.0214881  |
| C | -1.6479987 | -2.5064439 | -0.0020326 |
| H | -2.2871149 | -2.4334457 | 0.8694824  |
| H | -2.2869433 | -2.4244213 | -0.8729340 |
| H | -1.1684052 | -3.4793509 | -0.0071029 |

${}^1\pi_7\pi_8^*$  to  ${}^1\pi_7\pi_8^*$  /  ${}^1n_7\pi_7^*$

point 1

|   |            |            |            |
|---|------------|------------|------------|
| N | 0.1211067  | -0.0459685 | 1.2820416  |
| C | 0.1735065  | -0.0329661 | -0.0429464 |
| N | 1.3260154  | -0.0130597 | -0.6476593 |
| C | 2.6197475  | -0.0049609 | 0.0097163  |
| C | 2.5311379  | -0.0197649 | 1.4124483  |
| C | 1.3020189  | -0.0381491 | 2.0592720  |
| S | -1.3541580 | -0.0439265 | -0.9687841 |
| H | -0.7718844 | -0.0642783 | 1.7206258  |
| H | 1.3625265  | -0.0024716 | -1.6471671 |
| H | 1.1572462  | -0.0506215 | 3.1171688  |
| C | 3.7958432  | -0.0125412 | 2.2271223  |
| H | 3.5779846  | -0.0281223 | 3.2896093  |
| H | 4.4061511  | -0.8726978 | 1.9801577  |
| H | 4.3827021  | 0.8694592  | 2.0010269  |
| S | 3.9582544  | 0.0161778  | -1.0398705 |

point 2

|   |            |            |            |
|---|------------|------------|------------|
| N | 0.1197167  | -0.0455667 | 1.2836312  |
| C | 0.1728464  | -0.0332935 | -0.0445210 |
| N | 1.3279034  | -0.0136930 | -0.6467938 |
| C | 2.6166594  | -0.0025811 | 0.0061998  |
| C | 2.5296725  | -0.0190947 | 1.4147473  |
| C | 1.3034688  | -0.0385832 | 2.0582909  |
| S | -1.3554176 | -0.0463017 | -0.9719410 |
| H | -0.7717958 | -0.0586354 | 1.7242529  |
| H | 1.3650188  | -0.0065359 | -1.6465012 |
| H | 1.1593666  | -0.0524018 | 3.1167001  |
| C | 3.7955390  | -0.0133863 | 2.2269646  |
| H | 3.5784667  | -0.0294240 | 3.2895197  |

|   |           |            |            |
|---|-----------|------------|------------|
| H | 4.4058202 | -0.8734515 | 1.9792721  |
| H | 4.3821008 | 0.8685619  | 2.0004607  |
| S | 3.9588328 | 0.0204956  | -1.0375205 |

point 3

|   |            |            |            |
|---|------------|------------|------------|
| N | 0.1183368  | -0.0451510 | 1.2852180  |
| C | 0.1721961  | -0.0336238 | -0.0460995 |
| N | 1.3297933  | -0.0143058 | -0.6459279 |
| C | 2.6135590  | -0.0001907 | 0.0026894  |
| C | 2.5282086  | -0.0184261 | 1.4170470  |
| C | 1.3049201  | -0.0390024 | 2.0573051  |
| S | -1.3566664 | -0.0487230 | -0.9750970 |
| H | -0.7716628 | -0.0529857 | 1.7278700  |
| H | 1.3675133  | -0.0105946 | -1.6458228 |
| H | 1.1614823  | -0.0541668 | 3.1162236  |
| C | 3.7952300  | -0.0142413 | 2.2268054  |
| H | 3.5789431  | -0.0307378 | 3.2894278  |
| H | 4.4054796  | -0.8742172 | 1.9783822  |
| H | 4.3814990  | 0.8676525  | 1.9998974  |
| S | 3.9593667  | 0.0248225  | -1.0351569 |

point 4

|   |            |            |            |
|---|------------|------------|------------|
| N | 0.1169673  | -0.0447212 | 1.2868022  |
| C | 0.1715557  | -0.0339572 | -0.0476818 |
| N | 1.3316850  | -0.0148980 | -0.6450617 |
| C | 2.6104463  | 0.0022102  | -0.0008146 |
| C | 2.5267460  | -0.0177593 | 1.4193473  |
| C | 1.3063727  | -0.0394066 | 2.0563146  |
| S | -1.3579043 | -0.0511902 | -0.9782520 |
| H | -0.7714855 | -0.0473296 | 1.7314769  |

|   |           |            |            |
|---|-----------|------------|------------|
| H | 1.3700102 | -0.0146475 | -1.6451319 |
| H | 1.1635932 | -0.0559168 | 3.1157394  |
| C | 3.7949162 | -0.0151064 | 2.2266449  |
| H | 3.5794137 | -0.0320636 | 3.2893334  |
| H | 4.4051295 | -0.8749948 | 1.9774881  |
| H | 4.3808965 | 0.8667311  | 1.9993368  |
| S | 3.9598561 | 0.0291584  | -1.0327798 |

point 5

|   |            |            |            |
|---|------------|------------|------------|
| N | 0.1156079  | -0.0442776 | 1.2883836  |
| C | 0.1709252  | -0.0342934 | -0.0492678 |
| N | 1.3335785  | -0.0154695 | -0.6441953 |
| C | 2.6073213  | 0.0046213  | -0.0043124 |
| C | 2.5252848  | -0.0170944 | 1.4216481  |
| C | 1.3078268  | -0.0397959 | 2.0553196  |
| S | -1.3591311 | -0.0537026 | -0.9814057 |
| H | -0.7712640 | -0.0416673 | 1.7350735  |
| H | 1.3725098  | -0.0186945 | -1.6444284 |
| H | 1.1656994  | -0.0576520 | 3.1152477  |
| C | 3.7945974  | -0.0159812 | 2.2264829  |
| H | 3.5798785  | -0.0334010 | 3.2892366  |
| H | 4.4047698  | -0.8757841 | 1.9765899  |
| H | 4.3802932  | 0.8657980  | 1.9987788  |
| S | 3.9603012  | 0.0335030  | -1.0303892 |

point 6

|   |           |            |            |
|---|-----------|------------|------------|
| N | 0.1142587 | -0.0438201 | 1.2899624  |
| C | 0.1703046 | -0.0346326 | -0.0508577 |
| N | 1.3354740 | -0.0160202 | -0.6433287 |
| C | 2.6041840 | 0.0070423  | -0.0078039 |

|   |            |            |            |
|---|------------|------------|------------|
| C | 2.5238249  | -0.0164315 | 1.4239495  |
| C | 1.3092823  | -0.0401705 | 2.0543201  |
| S | -1.3603468 | -0.0562602 | -0.9845581 |
| H | -0.7709983 | -0.0359989 | 1.7386597  |
| H | 1.3750120  | -0.0227355 | -1.6437121 |
| H | 1.1678006  | -0.0593724 | 3.1147485  |
| C | 3.7942737  | -0.0168659 | 2.2263193  |
| H | 3.5803375  | -0.0347501 | 3.2891372  |
| H | 4.4044006  | -0.8765851 | 1.9756876  |
| H | 4.3796890  | 0.8648532  | 1.9982232  |
| S | 3.9607019  | 0.0378560  | -1.0279852 |

point 7

|   |            |            |            |
|---|------------|------------|------------|
| N | 0.1129198  | -0.0433488 | 1.2915385  |
| C | 0.1696939  | -0.0349746 | -0.0524512 |
| N | 1.3373713  | -0.0165500 | -0.6424620 |
| C | 2.6010344  | 0.0094730  | -0.0112890 |
| C | 2.5223662  | -0.0157708 | 1.4262514  |
| C | 1.3107391  | -0.0405305 | 2.0533163  |
| S | -1.3615513 | -0.0588623 | -0.9877090 |
| H | -0.7706885 | -0.0303246 | 1.7422353  |
| H | 1.3775172  | -0.0267703 | -1.6429830 |
| H | 1.1698970  | -0.0610783 | 3.1142419  |
| C | 3.7939449  | -0.0177602 | 2.2261541  |
| H | 3.5807907  | -0.0361105 | 3.2890353  |
| H | 4.4040218  | -0.8773975 | 1.9747811  |
| H | 4.3790837  | 0.8638968  | 1.9976698  |
| S | 3.9610584  | 0.0422173  | -1.0255678 |

point 8

|   |            |            |            |
|---|------------|------------|------------|
| N | 0.1115911  | -0.0428637 | 1.2931119  |
| C | 0.1690931  | -0.0353195 | -0.0540485 |
| N | 1.3392705  | -0.0170589 | -0.6415952 |
| C | 2.5978723  | 0.0119132  | -0.0147677 |
| C | 2.5209087  | -0.0151124 | 1.4285538  |
| C | 1.3121974  | -0.0408759 | 2.0523082  |
| S | -1.3627445 | -0.0615088 | -0.9908583 |
| H | -0.7703346 | -0.0246447 | 1.7458003  |
| H | 1.3800255  | -0.0307986 | -1.6422408 |
| H | 1.1719885  | -0.0627698 | 3.1137281  |
| C | 3.7936112  | -0.0186642 | 2.2259873  |
| H | 3.5812380  | -0.0374821 | 3.2889308  |
| H | 4.4036336  | -0.8782214 | 1.9738706  |
| H | 4.3784772  | 0.8629290  | 1.9971184  |
| S | 3.9613708  | 0.0465865  | -1.0231371 |

point 9

|   |            |            |            |
|---|------------|------------|------------|
| N | 0.1102726  | -0.0423648 | 1.2946826  |
| C | 0.1685021  | -0.0356672 | -0.0556495 |
| N | 1.3411716  | -0.0175468 | -0.6407283 |
| C | 2.5946978  | 0.0143625  | -0.0182400 |
| C | 2.5194524  | -0.0144564 | 1.4308567  |
| C | 1.3136571  | -0.0412068 | 2.0512959  |
| S | -1.3639262 | -0.0641992 | -0.9940059 |
| H | -0.7699368 | -0.0189592 | 1.7493545  |
| H | 1.3825370  | -0.0348205 | -1.6414856 |
| H | 1.1740750  | -0.0644472 | 3.1132071  |
| C | 3.7932723  | -0.0195776 | 2.2258188  |
| H | 3.5816795  | -0.0388649 | 3.2888236  |
| H | 4.4032360  | -0.8790566 | 1.9729561  |

|   |           |           |            |
|---|-----------|-----------|------------|
| H | 4.3778694 | 0.8619498 | 1.9965689  |
| S | 3.9616390 | 0.0509634 | -1.0206931 |

point 10

|   |            |            |            |
|---|------------|------------|------------|
| N | 0.1089644  | -0.0418522 | 1.2962507  |
| C | 0.1679211  | -0.0360176 | -0.0572541 |
| N | 1.3430747  | -0.0180136 | -0.6398614 |
| C | 2.5915109  | 0.0168207  | -0.0217060 |
| C | 2.5179971  | -0.0138030 | 1.4331601  |
| C | 1.3151182  | -0.0415233 | 2.0502795  |
| S | -1.3650965 | -0.0669331 | -0.9971516 |
| H | -0.7694951 | -0.0132685 | 1.7528978  |
| H | 1.3850518  | -0.0388356 | -1.6407172 |
| H | 1.1761566  | -0.0661105 | 3.1126790  |
| C | 3.7929282  | -0.0205005 | 2.2256485  |
| H | 3.5821150  | -0.0402585 | 3.2887137  |
| H | 4.4028289  | -0.8799029 | 1.9720375  |
| H | 4.3772601  | 0.8609594  | 1.9960211  |
| S | 3.9618632  | 0.0553479  | -1.0182359 |

${}^1n_7\pi_7^*$  to  ${}^1n_8\pi_8^*$  /  ${}^1n_7\pi_7^*$

point 1

|   |            |            |            |
|---|------------|------------|------------|
| C | -0.6185249 | -1.3997471 | 0.0035427  |
| C | -1.0401409 | 0.0165636  | 0.0143775  |
| C | 1.3266745  | 0.6344702  | 0.0142435  |
| C | 0.7062956  | -1.6740763 | -0.0018640 |
| H | 1.0749300  | -2.6815185 | -0.0100816 |
| N | -0.0360913 | 0.9220684  | 0.0196449  |
| H | -0.3177840 | 1.8776296  | 0.0253809  |
| N | 1.6790350  | -0.7079598 | 0.0021157  |



|   |            |            |            |
|---|------------|------------|------------|
| H | 2.6353713  | -0.9690168 | 0.0002333  |
| S | -2.6200513 | 0.5114669  | 0.0198552  |
| S | 2.5750169  | 1.9461343  | 0.0226100  |
| C | -1.6458136 | -2.5009077 | -0.0015412 |
| H | -2.2833442 | -2.4497734 | 0.8730741  |
| H | -2.2881780 | -2.4372869 | -0.8717710 |
| H | -1.1556097 | -3.4686651 | -0.0098199 |

point 2

|   |            |            |            |
|---|------------|------------|------------|
| C | -0.6190686 | -1.4002439 | 0.0043556  |
| C | -1.0382243 | 0.0139159  | 0.0186698  |
| C | 1.3291943  | 0.6347600  | 0.0315490  |
| C | 0.7060903  | -1.6752837 | 0.0024056  |
| H | 1.0751850  | -2.6824189 | -0.0075129 |
| N | -0.0329716 | 0.9213141  | 0.0310664  |
| H | -0.3135733 | 1.8772199  | 0.0401614  |
| N | 1.6782476  | -0.7075306 | 0.0137276  |
| H | 2.6348646  | -0.9685476 | 0.0140038  |
| S | -2.6197050 | 0.5122319  | 0.0212792  |
| S | 2.5692669  | 1.9512736  | -0.0291809 |
| C | -1.6468534 | -2.5010576 | -0.0078374 |
| H | -2.2873865 | -2.4524005 | 0.8648101  |
| H | -2.2859804 | -2.4347995 | -0.8803258 |
| H | -1.1573003 | -3.4690516 | -0.0171713 |

point 3

|   |            |            |           |
|---|------------|------------|-----------|
| C | -0.6195237 | -1.4005408 | 0.0051689 |
| C | -1.0363913 | 0.0114072  | 0.0229044 |
| C | 1.3315031  | 0.6353894  | 0.0487659 |
| C | 0.7059924  | -1.6761559 | 0.0066847 |

|   |            |            |            |
|---|------------|------------|------------|
| H | 1.0756632  | -2.6829392 | -0.0048828 |
| N | -0.0300617 | 0.9207820  | 0.0424357  |
| H | -0.3096899 | 1.8769851  | 0.0548785  |
| N | 1.6774292  | -0.7066844 | 0.0252859  |
| H | 2.6343502  | -0.9675587 | 0.0276591  |
| S | -2.6194828 | 0.5129762  | 0.0226484  |
| S | 2.5630507  | 1.9533329  | -0.0807662 |
| C | -1.6476603 | -2.5010967 | -0.0140893 |
| H | -2.2911947 | -2.4549446 | 0.8565707  |
| H | -2.2835483 | -2.4322989 | -0.8888195 |
| H | -1.1586506 | -3.4692720 | -0.0244443 |

point 4

|   |            |            |            |
|---|------------|------------|------------|
| C | -0.6198913 | -1.4006397 | 0.0059798  |
| C | -1.0346407 | 0.0090369  | 0.0271005  |
| C | 1.3336023  | 0.6363560  | 0.0659297  |
| C | 0.7060007  | -1.6766963 | 0.0109624  |
| H | 1.0763616  | -2.6830828 | -0.0022212 |
| N | -0.0273600 | 0.9204711  | 0.0537717  |
| H | -0.3061312 | 1.8769247  | 0.0695555  |
| N | 1.6765793  | -0.7054251 | 0.0368067  |
| H | 2.6338275  | -0.9660553 | 0.0412420  |
| S | -2.6193840 | 0.5137003  | 0.0239897  |
| S | 2.5563796  | 1.9523384  | -0.1322090 |
| C | -1.6482371 | -2.5010264 | -0.0203133 |
| H | -2.2947683 | -2.4574202 | 0.8483425  |
| H | -2.2808879 | -2.4297719 | -0.8972659 |
| H | -1.1596648 | -3.4693281 | -0.0316710 |

point 5

|   |            |            |            |
|---|------------|------------|------------|
| C | -0.6201718 | -1.4005400 | 0.0067852  |
| C | -1.0329723 | 0.0068060  | 0.0312777  |
| C | 1.3354907  | 0.6376619  | 0.0830777  |
| C | 0.7061151  | -1.6769032 | 0.0152279  |
| H | 1.0772805  | -2.6828479 | 0.0004416  |
| N | -0.0248672 | 0.9203831  | 0.0650937  |
| H | -0.3028985 | 1.8770408  | 0.0842166  |
| N | 1.6756973  | -0.7037516 | 0.0483070  |
| H | 2.6332958  | -0.9640358 | 0.0547968  |
| S | -2.6194098 | 0.5144040  | 0.0253307  |
| S | 2.5492584  | 1.9482760  | -0.1835766 |
| C | -1.6485839 | -2.5008465 | -0.0265263 |
| H | -2.2981040 | -2.4598415 | 0.8401113  |
| H | -2.2780024 | -2.4272041 | -0.9056790 |
| H | -1.1603425 | -3.4692197 | -0.0388844 |

point 6

|   |            |            |            |
|---|------------|------------|------------|
| C | -0.6203642 | -1.4002382 | 0.0075821  |
| C | -1.0313871 | 0.0047175  | 0.0354562  |
| C | 1.3371648  | 0.6393137  | 0.1002478  |
| C | 0.7063375  | -1.6767705 | 0.0194698  |
| H | 1.0784236  | -2.6822268 | 0.0030739  |
| N | -0.0225866 | 0.9205230  | 0.0764220  |
| H | -0.2999966 | 1.8773381  | 0.0988873  |
| N | 1.6747822  | -0.7016569 | 0.0598039  |
| H | 2.6327541  | -0.9614924 | 0.0683688  |
| S | -2.6195631 | 0.5150864  | 0.0267000  |
| S | 2.5416857  | 1.9410899  | -0.2349377 |
| C | -1.6486977 | -2.5005552 | -0.0327455 |
| H | -2.3011958 | -2.4622229 | 0.8318627  |

H -2.2748926 -2.4245804 -0.9140731

H -1.1606788 -3.4689440 -0.0461183

point 7

C -0.6204664 -1.3997281 0.0083670

C -1.0298874 0.0027760 0.0396568

C 1.3386186 0.6413230 0.1174783

C 0.7066711 -1.6762870 0.0236754

H 1.0797978 -2.6812062 0.0056421

N -0.0205240 0.9208989 0.0877770

H -0.2974346 1.8778237 0.1135935

N 1.6738329 -0.6991280 0.0713139

H 2.6322011 -0.9584105 0.0820032

S -2.6198494 0.5157459 0.0281279

S 2.5336539 1.9306815 -0.2863585

C -1.6485729 -2.5001492 -0.0389884

H -2.3040339 -2.4645785 0.8235820

H -2.2715570 -2.4218843 -0.9224622

H -1.1606643 -3.4684956 -0.0534079

point 8

C -0.6204754 -1.3990006 0.0091362

C -1.0284768 0.0009881 0.0439005

C 1.3398432 0.6437061 0.1348071

C 0.7071209 -1.6754362 0.0278301

H 1.0814137 -2.6797668 0.0081097

N -0.0186879 0.9215222 0.0991789

H -0.2952255 1.8785079 0.1283613

N 1.6728479 -0.6961462 0.0828520

H 2.6316351 -0.9547686 0.0957441

|   |            |            |            |
|---|------------|------------|------------|
| S | -2.6202761 | 0.5163801  | 0.0296467  |
| S | 2.5251485  | 1.9169066  | -0.3378996 |
| C | -1.6482004 | -2.4996238 | -0.0452727 |
| H | -2.3066048 | -2.4669225 | 0.8152550  |
| H | -2.2679922 | -2.4190984 | -0.9308599 |
| H | -1.1602848 | -3.4678665 | -0.0607894 |

point 9

|   |            |            |            |
|---|------------|------------|------------|
| C | -0.6203867 | -1.3980432 | 0.0098850  |
| C | -1.0271602 | -0.0006373 | 0.0482089  |
| C | 1.3408270  | 0.6464849  | 0.1522710  |
| C | 0.7076939  | -1.6741964 | 0.0319167  |
| H | 1.0832855  | -2.6778824 | 0.0104366  |
| N | -0.0170893 | 0.9224081  | 0.1106470  |
| H | -0.2933865 | 1.8794036  | 0.1432164  |
| N | 1.6718256  | -0.6926860 | 0.0944308  |
| H | 2.6310543  | -0.9505377 | 0.1096337  |
| S | -2.6208528 | 0.5169859  | 0.0312913  |
| S | 2.5161477  | 1.8995728  | -0.3896103 |
| C | -1.6475683 | -2.4989721 | -0.0516162 |
| H | -2.3088909 | -2.4692689 | 0.8068682  |
| H | -2.2641928 | -2.4162038 | -0.9392788 |
| H | -1.1595209 | -3.4670460 | -0.0683002 |

point 10

|   |            |            |           |
|---|------------|------------|-----------|
| C | -0.6201947 | -1.3968403 | 0.0106077 |
| C | -1.0259438 | -0.0020895 | 0.0526037 |
| C | 1.3415559  | 0.6496869  | 0.1699043 |
| C | 0.7083986  | -1.6725397 | 0.0359144 |
| H | 1.0854313  | -2.6755203 | 0.0125776 |

|   |            |            |            |
|---|------------|------------|------------|
| N | -0.0157423 | 0.9235755  | 0.1221994  |
| H | -0.2919391 | 1.8805273  | 0.1581839  |
| N | 1.6707643  | -0.6887153 | 0.1060591  |
| H | 2.6304565  | -0.9456811 | 0.1237108  |
| S | -2.6215918 | 0.5175593  | 0.0330997  |
| S | 2.5066215  | 1.8784371  | -0.4415239 |
| C | -1.6466611 | -2.4981858 | -0.0580366 |
| H | -2.3108694 | -2.4716319 | 0.7984092  |
| H | -2.2601521 | -2.4131805 | -0.9477300 |
| H | -1.1583484 | -3.4660203 | -0.0759791 |

## II. microsolvated surrounding

FC point to  ${}^1n_7\pi_7^*$

point 1

|   |            |            |            |
|---|------------|------------|------------|
| C | -0.1369756 | -0.7979745 | -0.2804768 |
| C | -1.1072190 | 0.2836126  | -0.3502994 |
| C | 0.7180212  | 1.8905201  | -0.1743053 |
| C | 1.1644186  | -0.4491934 | -0.1621704 |
| H | -1.2375985 | 2.3242509  | -0.4170036 |
| N | 1.5722092  | 0.8616931  | -0.1083468 |
| H | 1.9584765  | -1.1656713 | -0.0952674 |
| N | -0.5904525 | 1.5490391  | -0.3157664 |
| H | 2.5587399  | 1.0495271  | -0.0250813 |
| S | -2.7478895 | 0.0355883  | -0.4566094 |
| S | 1.2148427  | 3.5216966  | -0.0841780 |
| C | -0.5701262 | -2.2385187 | -0.3283219 |
| H | -1.2328249 | -2.4734327 | 0.4956489  |
| H | -1.1045395 | -2.4538154 | -1.2455945 |
| H | 0.2937917  | -2.8905177 | -0.2719127 |
| O | -4.7009097 | 3.0119143  | 0.5179796  |

|   |            |           |            |
|---|------------|-----------|------------|
| H | -5.4048421 | 3.0468914 | -0.1164509 |
| H | -4.3281112 | 2.1403360 | 0.4340712  |
| O | 4.4434653  | 0.9709123 | 0.1489821  |
| H | 4.6010477  | 1.7004935 | 0.7498347  |
| H | 4.9194976  | 1.1867963 | -0.6418916 |
| O | 4.2955142  | 3.3622311 | 1.6395437  |
| H | 3.4132093  | 3.5425540 | 1.3243966  |
| H | 4.7692384  | 4.1803645 | 1.5746753  |
| O | -2.2507491 | 3.8615259 | -0.6638647 |
| H | -3.0795478 | 3.8518343 | -0.1901612 |
| H | -1.7129014 | 4.5511565 | -0.2972711 |

point 2

|   |            |            |            |
|---|------------|------------|------------|
| C | -0.1403849 | -0.7888926 | -0.2680882 |
| C | -1.1070625 | 0.2947238  | -0.3318508 |
| C | 0.7278147  | 1.8967887  | -0.2310266 |
| C | 1.1664058  | -0.4446088 | -0.1869535 |
| H | -1.2352993 | 2.3345943  | -0.4254817 |
| N | 1.5820535  | 0.8638043  | -0.1632680 |
| H | 1.9576641  | -1.1650049 | -0.1290520 |
| N | -0.5886681 | 1.5598374  | -0.3285890 |
| H | 2.5702197  | 1.0500336  | -0.1079572 |
| S | -2.7532414 | 0.0494168  | -0.3989666 |
| S | 1.2408339  | 3.5325019  | -0.1223129 |
| C | -0.5795894 | -2.2285487 | -0.2827635 |
| H | -1.2235814 | -2.4487650 | 0.5600601  |
| H | -1.1354338 | -2.4575558 | -1.1839937 |
| H | 0.2832236  | -2.8828611 | -0.2357571 |
| O | -4.7116957 | 2.9904706  | 0.4770455  |
| H | -5.4035596 | 2.9847829  | -0.1714758 |

|   |            |           |            |
|---|------------|-----------|------------|
| H | -4.3175791 | 2.1254023 | 0.4338087  |
| O | 4.4598469  | 0.9938283 | 0.0773588  |
| H | 4.6084548  | 1.6925073 | 0.7155140  |
| H | 4.9455621  | 1.2480830 | -0.6960691 |
| O | 4.2955910  | 3.3035336 | 1.7028030  |
| H | 3.4107521  | 3.5034700 | 1.4085776  |
| H | 4.7689991  | 4.1242751 | 1.6860860  |
| O | -2.2532126 | 3.8855803 | -0.6579305 |
| H | -3.0999204 | 3.8514207 | -0.2186448 |
| H | -1.7504075 | 4.5849963 | -0.2609142 |

point 3

|   |            |            |            |
|---|------------|------------|------------|
| C | -0.1417747 | -0.7810101 | -0.2555188 |
| C | -1.1047601 | 0.3047319  | -0.3126364 |
| C | 0.7376416  | 1.9006591  | -0.2832422 |
| C | 1.1694322  | -0.4418227 | -0.2101173 |
| H | -1.2314080 | 2.3436534  | -0.4301976 |
| N | 1.5921180  | 0.8636439  | -0.2147829 |
| H | 1.9576295  | -1.1662939 | -0.1614615 |
| N | -0.5855034 | 1.5691176  | -0.3382754 |
| H | 2.5812347  | 1.0476108  | -0.1858682 |
| S | -2.7555487 | 0.0626592  | -0.3421233 |
| S | 1.2662686  | 3.5405625  | -0.1532054 |
| C | -0.5861633 | -2.2192834 | -0.2392709 |
| H | -1.2116387 | -2.4258237 | 0.6209527  |
| H | -1.1623888 | -2.4604721 | -1.1245389 |
| H | 0.2753424  | -2.8760394 | -0.2018319 |
| O | -4.7247919 | 2.9751119  | 0.4325912  |
| H | -5.4005745 | 2.9324622  | -0.2313578 |
| H | -4.3142814 | 2.1166881  | 0.4309722  |



|   |            |           |            |
|---|------------|-----------|------------|
| O | 4.4758292  | 1.0204557 | 0.0078839  |
| H | 4.6148116  | 1.6887406 | 0.6794028  |
| H | 4.9677780  | 1.3117931 | -0.7483471 |
| O | 4.2914455  | 3.2452982 | 1.7575394  |
| H | 3.4025104  | 3.4585477 | 1.4873730  |
| H | 4.7613063  | 4.0678098 | 1.7851677  |
| O | -2.2534537 | 3.9088555 | -0.6464483 |
| H | -3.1167784 | 3.8510086 | -0.2437319 |
| H | -1.7864972 | 4.6151498 | -0.2187684 |

point 4

|   |            |            |            |
|---|------------|------------|------------|
| C | -0.1414869 | -0.7744937 | -0.2427355 |
| C | -1.1007010 | 0.3134135  | -0.2926678 |
| C | 0.7472457  | 1.9022827  | -0.3306525 |
| C | 1.1732262  | -0.4408121 | -0.2314687 |
| H | -1.2262844 | 2.3513200  | -0.4310881 |
| N | 1.6021430  | 0.8613599  | -0.2625983 |
| H | 1.9581426  | -1.1694538 | -0.1922672 |
| N | -0.5812992 | 1.5768049  | -0.3447169 |
| H | 2.5916176  | 1.0425725  | -0.2583434 |
| S | -2.7552826 | 0.0748832  | -0.2862880 |
| S | 1.2908211  | 3.5459246  | -0.1761138 |
| C | -0.5902240 | -2.2110363 | -0.1979361 |
| H | -1.1975123 | -2.4050485 | 0.6782565  |
| H | -1.1857057 | -2.4629276 | -1.0675013 |
| H | 0.2698126  | -2.8703014 | -0.1701734 |
| O | -4.7405048 | 2.9655000  | 0.3840054  |
| H | -5.3964424 | 2.8897173  | -0.2967103 |
| H | -4.3189201 | 2.1135085  | 0.4247755  |
| O | 4.4910253  | 1.0504855  | -0.0594019 |

|   |            |           |            |
|---|------------|-----------|------------|
| H | 4.6205989  | 1.6891862 | 0.6417078  |
| H | 4.9855835  | 1.3774876 | -0.7991585 |
| O | 4.2855140  | 3.1886209 | 1.8040669  |
| H | 3.3910704  | 3.4092398 | 1.5608450  |
| H | 4.7492497  | 4.0122943 | 1.8720041  |
| O | -2.2518588 | 3.9311658 | -0.6293263 |
| H | -3.1304557 | 3.8506431 | -0.2654763 |
| H | -1.8215875 | 4.6414773 | -0.1708781 |

point 5

|   |            |            |            |
|---|------------|------------|------------|
| C | -0.1398536 | -0.7694800 | -0.2296692 |
| C | -1.0952802 | 0.3205634  | -0.2719313 |
| C | 0.7563674  | 1.9018354  | -0.3730685 |
| C | 1.1775339  | -0.4415140 | -0.2508329 |
| H | -1.2203185 | 2.3574844  | -0.4281485 |
| N | 1.6118794  | 0.8571402  | -0.3064923 |
| H | 1.9590026  | -1.1743504 | -0.2212537 |
| N | -0.5764110 | 1.5828369  | -0.3478514 |
| H | 2.6012140  | 1.0352877  | -0.3250637 |
| S | -2.7529281 | 0.0856626  | -0.2315825 |
| S | 1.3141272  | 3.5486399  | -0.1904897 |
| C | -0.5921288 | -2.2040863 | -0.1587451 |
| H | -1.1816770 | -2.3868096 | 0.7320350  |
| H | -1.2056943 | -2.4652942 | -1.0130186 |
| H | 0.2663280  | -2.8658512 | -0.1407136 |
| O | -4.7589526 | 2.9613727  | 0.3306571  |
| H | -5.3914917 | 2.8563630  | -0.3681133 |
| H | -4.3320041 | 2.1152812  | 0.4143361  |
| O | 4.5050488  | 1.0837080  | -0.1247315 |
| H | 4.6262210  | 1.6938074  | 0.6024864  |

|   |            |           |            |
|---|------------|-----------|------------|
| H | 4.9984548  | 1.4449511 | -0.8491316 |
| O | 4.2800566  | 3.1343127 | 1.8429263  |
| H | 3.3789549  | 3.3567600 | 1.6294311  |
| H | 4.7357032  | 3.9587443 | 1.9470850  |
| O | -2.2488848 | 3.9522897 | -0.6065599 |
| H | -3.1413156 | 3.8503395 | -0.2839671 |
| H | -1.8561662 | 4.6638197 | -0.1174338 |

point 6

|   |            |            |            |
|---|------------|------------|------------|
| C | -0.1371911 | -0.7660547 | -0.2162259 |
| C | -1.0888983 | 0.3260100  | -0.2503983 |
| C | 0.7647226  | 1.8995336  | -0.4103686 |
| C | 1.1821180  | -0.4438014 | -0.2680413 |
| H | -1.2139469 | 2.3620487  | -0.4214121 |
| N | 1.6210754  | 0.8512350  | -0.3462821 |
| H | 1.9600417  | -1.1807729 | -0.2482056 |
| N | -0.5712227 | 1.5871788  | -0.3476465 |
| H | 2.6098622  | 1.0261980  | -0.3857987 |
| S | -2.7489770 | 0.0945882  | -0.1780798 |
| S | 1.3357425  | 3.5487837  | -0.1959025 |
| C | -0.5921967 | -2.1986572 | -0.1216148 |
| H | -1.1645541 | -2.3713996 | 0.7824327  |
| H | -1.2226371 | -2.4679202 | -0.9611396 |
| H | 0.2646355  | -2.8628239 | -0.1133134 |
| O | -4.7800845 | 2.9625010  | 0.2719022  |
| H | -5.3858348 | 2.8322057  | -0.4461118 |
| H | -4.3538450 | 2.1214996  | 0.3986575  |
| O | 4.5174953  | 1.1199471  | -0.1884763 |
| H | 4.6320088  | 1.7025048  | 0.5617049  |
| H | 5.0059018  | 1.5140422  | -0.8989382 |

|   |            |           |            |
|---|------------|-----------|------------|
| O | 4.2772005  | 3.0829286 | 1.8747514  |
| H | 3.3686626  | 3.3021157 | 1.6937766  |
| H | 4.7233980  | 3.9078589 | 2.0111139  |
| O | -2.2450849 | 3.9719807 | -0.5782028 |
| H | -3.1497837 | 3.8500742 | -0.2993033 |
| H | -1.8908229 | 4.6820092 | -0.0587189 |

point 7

|   |            |            |            |
|---|------------|------------|------------|
| C | -0.1337994 | -0.7642461 | -0.2023002 |
| C | -1.0819626 | 0.3296230  | -0.2280344 |
| C | 0.7719945  | 1.8956382  | -0.4424725 |
| C | 1.1867551  | -0.4474784 | -0.2829306 |
| H | -1.2076573 | 2.3649346  | -0.4109354 |
| N | 1.6294715  | 0.8439621  | -0.3818084 |
| H | 1.9611228  | -1.1884294 | -0.2729102 |
| N | -0.5661505 | 1.5898295  | -0.3440893 |
| H | 2.6173847  | 1.0158171  | -0.4403698 |
| S | -2.7439261 | 0.1012754  | -0.1258294 |
| S | 1.3551262  | 3.5464571  | -0.1919901 |
| C | -0.5907042 | -2.1949089 | -0.0864257 |
| H | -1.1465131 | -2.3590340 | 0.8296337  |
| H | -1.2367773 | -2.4711127 | -0.9118617 |
| H | 0.2645388  | -2.8612776 | -0.0877959 |
| O | -4.8036779 | 2.9686625  | 0.2071083  |
| H | -5.3793610 | 2.8170272  | -0.5311950 |
| H | -4.3845326 | 2.1317151  | 0.3766346  |
| O | 4.5279384  | 1.1590036  | -0.2510379 |
| H | 4.6382181  | 1.7150953  | 0.5192917  |
| H | 5.0074855  | 1.5845797  | -0.9491772 |
| O | 4.2789411  | 3.0348195  | 1.9001735  |

|   |            |           |            |
|---|------------|-----------|------------|
| H | 3.3626640  | 3.2461667 | 1.7545931  |
| H | 4.7149392  | 3.8600618 | 2.0648676  |
| O | -2.2411161 | 3.9899774 | -0.5443415 |
| H | -3.1563592 | 3.8497815 | -0.3115714 |
| H | -1.9262573 | 4.6958740 | 0.0049327  |

point 8

|   |            |            |            |
|---|------------|------------|------------|
| C | -0.1299652 | -0.7640257 | -0.1877883 |
| C | -1.0748862 | 0.3313157  | -0.2048080 |
| C | 0.7778358  | 1.8904511  | -0.4693286 |
| C | 1.1912327  | -0.4522852 | -0.2953498 |
| H | -1.2019832 | 2.3660888  | -0.3967884 |
| N | 1.6368000  | 0.8356997  | -0.4129327 |
| H | 1.9621344  | -1.1969548 | -0.2951670 |
| N | -0.5616408 | 1.5908231  | -0.3371816 |
| H | 2.6235876  | 1.0047187  | -0.4886350 |
| S | -2.7382744 | 0.1053726  | -0.0748725 |
| S | 1.3716408  | 3.5417782  | -0.1784344 |
| C | -0.5878901 | -2.1929377 | -0.0530482 |
| H | -1.1278784 | -2.3498555 | 0.8738312  |
| H | -1.2483213 | -2.4751285 | -0.8651608 |
| H | 0.2658913  | -2.8611962 | -0.0639747 |
| O | -4.8293243 | 2.9796245  | 0.1356941  |
| H | -5.3717202 | 2.8105783  | -0.6237581 |
| H | -4.4238968 | 2.1455263  | 0.3470804  |
| O | 4.5359387  | 1.2006108  | -0.3127659 |
| H | 4.6450272  | 1.7312996  | 0.4751831  |
| H | 5.0028482  | 1.6562675  | -1.0002890 |
| O | 4.2871084  | 2.9901862  | 1.9197537  |
| H | 3.3633558  | 3.1896875  | 1.8125397  |

|   |            |           |            |
|---|------------|-----------|------------|
| H | 4.7127778  | 3.8155616 | 2.1090965  |
| O | -2.2377329 | 4.0060127 | -0.5050772 |
| H | -3.1616106 | 3.8493561 | -0.3208278 |
| H | -1.9632690 | 4.7052385 | 0.0731680  |

point 9

|   |            |            |            |
|---|------------|------------|------------|
| C | -0.1259630 | -0.7653118 | -0.1726003 |
| C | -1.0680833 | 0.3310472  | -0.1806965 |
| C | 0.7818773  | 1.8843075  | -0.4909127 |
| C | 1.1953471  | -0.4579084 | -0.3051707 |
| H | -1.1974901 | 2.3654858  | -0.3790518 |
| N | 1.6427885  | 0.8268746  | -0.4395434 |
| H | 1.9629846  | -1.2059261 | -0.3148033 |
| N | -0.5581603 | 1.5902287  | -0.3269408 |
| H | 2.6282639  | 0.9935183  | -0.5304881 |
| S | -2.7325179 | 0.1065708  | -0.0252497 |
| S | 1.3845652  | 3.5348664  | -0.1549573 |
| C | -0.5839630 | -2.1927773 | -0.0213604 |
| H | -1.1089353 | -2.3439370 | 0.9152086  |
| H | -1.2574470 | -2.4801677 | -0.8210092 |
| H | 0.2685853  | -2.8624952 | -0.0416753 |
| O | -4.8564108 | 2.9951356  | 0.0571800  |
| H | -5.3623089 | 2.8125798  | -0.7240497 |
| H | -4.4714619 | 2.1625712  | 0.3087729  |
| O | 4.5410631  | 1.2444074  | -0.3739000 |
| H | 4.6525348  | 1.7507372  | 0.4293580  |
| H | 4.9917516  | 1.7286599  | -1.0525005 |
| O | 4.3033080  | 2.9491221  | 1.9339381  |
| H | 3.3729805  | 3.1334153  | 1.8681271  |
| H | 4.7191451  | 3.7744090  | 2.1444543  |

|   |            |           |            |
|---|------------|-----------|------------|
| O | -2.2357704 | 4.0198203 | -0.4605160 |
| H | -3.1661628 | 3.8486588 | -0.3270876 |
| H | -2.0027349 | 4.7099220 | 0.1456330  |

point 10

|   |            |            |            |
|---|------------|------------|------------|
| C | -0.1220549 | -0.7679740 | -0.1566685 |
| C | -1.0619617 | 0.3288232  | -0.1556916 |
| C | 0.7837407  | 1.8775666  | -0.5072347 |
| C | 1.1989037  | -0.4639932 | -0.3122997 |
| H | -1.1947569 | 2.3631311  | -0.3578184 |
| N | 1.6471662  | 0.8179466  | -0.4615674 |
| H | 1.9635958  | -1.2148787 | -0.3316872 |
| N | -0.5561828 | 1.5881487  | -0.3134047 |
| H | 2.6311994  | 0.9828533  | -0.5658684 |
| S | -2.7271397 | 0.1046145  | 0.0229985  |
| S | 1.3931147  | 3.5258232  | -0.1213338 |
| C | -0.5791069 | -2.1944011 | 0.0087426  |
| H | -1.0899323 | -2.3412824 | 0.9539308  |
| H | -1.2643135 | -2.4863702 | -0.7793833 |
| H | 0.2725406  | -2.8650293 | -0.0207471 |
| O | -4.8841090 | 3.0149210  | -0.0287567 |
| H | -5.3502644 | 2.8227222  | -0.8321119 |
| H | -4.5264036 | 2.1825224  | 0.2605184  |
| O | 4.5429129  | 1.2899286  | -0.4345337 |
| H | 4.6607607  | 1.7729287  | 0.3818622  |
| H | 4.9741186  | 1.8011608  | -1.1057970 |
| O | 4.3288495  | 2.9116383  | 1.9430306  |
| H | 3.3935226  | 3.0780738  | 1.9216440  |
| H | 4.7359675  | 3.7365385  | 2.1714538  |
| O | -2.2361214 | 4.0311404  | -0.4107692 |

|   |            |           |            |
|---|------------|-----------|------------|
| H | -3.1706790 | 3.8475241 | -0.3303259 |
| H | -2.0455816 | 4.7097369 | 0.2219771  |

FC point to  ${}^1\pi_7\pi_8^*$

point 1

|   |            |            |            |
|---|------------|------------|------------|
| C | -0.1369756 | -0.7979745 | -0.2804768 |
| C | -1.1072190 | 0.2836126  | -0.3502994 |
| C | 0.7180212  | 1.8905201  | -0.1743053 |
| C | 1.1644186  | -0.4491934 | -0.1621704 |
| H | -1.2375985 | 2.3242509  | -0.4170036 |
| N | 1.5722092  | 0.8616931  | -0.1083468 |
| H | 1.9584765  | -1.1656713 | -0.0952674 |
| N | -0.5904525 | 1.5490391  | -0.3157664 |
| H | 2.5587399  | 1.0495271  | -0.0250813 |
| S | -2.7478895 | 0.0355883  | -0.4566094 |
| S | 1.2148427  | 3.5216966  | -0.0841780 |
| C | -0.5701262 | -2.2385187 | -0.3283219 |
| H | -1.2328249 | -2.4734327 | 0.4956489  |
| H | -1.1045395 | -2.4538154 | -1.2455945 |
| H | 0.2937917  | -2.8905177 | -0.2719127 |
| O | -4.7009097 | 3.0119143  | 0.5179796  |
| H | -5.4048421 | 3.0468914  | -0.1164509 |
| H | -4.3281112 | 2.1403360  | 0.4340712  |
| O | 4.4434653  | 0.9709123  | 0.1489821  |
| H | 4.6010477  | 1.7004935  | 0.7498347  |
| H | 4.9194976  | 1.1867963  | -0.6418916 |
| O | 4.2955142  | 3.3622311  | 1.6395437  |
| H | 3.4132093  | 3.5425540  | 1.3243966  |
| H | 4.7692384  | 4.1803645  | 1.5746753  |
| O | -2.2507491 | 3.8615259  | -0.6638647 |



|   |            |           |            |
|---|------------|-----------|------------|
| H | -3.0795478 | 3.8518343 | -0.1901612 |
| H | -1.7129014 | 4.5511565 | -0.2972711 |

point 2

|   |            |            |            |
|---|------------|------------|------------|
| C | -0.1615945 | -0.7991935 | -0.2861655 |
| C | -1.1280778 | 0.2772585  | -0.3687867 |
| C | 0.6964771  | 1.8810115  | -0.1743157 |
| C | 1.1446224  | -0.4572150 | -0.1542069 |
| H | -1.2531491 | 2.3263641  | -0.4270512 |
| N | 1.5528554  | 0.8568210  | -0.0996535 |
| H | 1.9361797  | -1.1747898 | -0.0765449 |
| N | -0.6078773 | 1.5498852  | -0.3259611 |
| H | 2.5383130  | 1.0471154  | -0.0093168 |
| S | -2.7753083 | 0.0415481  | -0.5020950 |
| S | 1.2033280  | 3.5171098  | -0.0790050 |
| C | -0.5963906 | -2.2391873 | -0.3369953 |
| H | -1.2711336 | -2.4701841 | 0.4782774  |
| H | -1.1196084 | -2.4540765 | -1.2608293 |
| H | 0.2647396  | -2.8938073 | -0.2679287 |
| O | -4.7024158 | 2.9639466  | 0.5020427  |
| H | -5.4094423 | 2.9754370  | -0.1298313 |
| H | -4.3079141 | 2.1009000  | 0.4221955  |
| O | 4.4213062  | 0.9842191  | 0.1737706  |
| H | 4.5994401  | 1.7169931  | 0.7647303  |
| H | 4.9116397  | 1.1663324  | -0.6166523 |
| O | 4.4156968  | 3.4082780  | 1.6349107  |
| H | 3.5441304  | 3.6681418  | 1.3487217  |
| H | 4.9576961  | 4.1821718  | 1.5612278  |
| O | -2.2628272 | 3.8748245  | -0.6524680 |
| H | -3.1091273 | 3.8325696  | -0.2133368 |

H -1.7637729 4.5713401 -0.2445737

point 3

C -0.1842488 -0.7996238 -0.2905324

C -1.1475167 0.2710974 -0.3852111

C 0.6754003 1.8728127 -0.1745697

C 1.1265504 -0.4636704 -0.1461968

H -1.2686326 2.3285533 -0.4353677

N 1.5345241 0.8537722 -0.0917316

H 1.9159907 -1.1818250 -0.0583906

N -0.6246695 1.5512177 -0.3348690

H 2.5188444 1.0471097 0.0045655

S -2.8008013 0.0468049 -0.5439928

S 1.1914687 3.5140881 -0.0749639

C -0.6198840 -2.2393326 -0.3435547

H -1.3056128 -2.4665835 0.4635795

H -1.1326148 -2.4543809 -1.2732476

H 0.2387371 -2.8960324 -0.2625488

O -4.7093822 2.9207651 0.4821883

H -5.4161702 2.9103945 -0.1500011

H -4.2958157 2.0654074 0.4088946

O 4.4001363 1.0011313 0.1948320

H 4.5984987 1.7365929 0.7756186

H 4.9038071 1.1496058 -0.5940977

O 4.5337538 3.4459035 1.6304122

H 3.6811864 3.7837925 1.3719796

H 5.1387111 4.1711887 1.5514760

O -2.2772937 3.8864201 -0.6383129

H -3.1387488 3.8114994 -0.2345293

H -1.8184326 4.5871055 -0.1912699

point 4

|   |            |            |            |
|---|------------|------------|------------|
| C | -0.2048606 | -0.7992823 | -0.2935681 |
| C | -1.1653887 | 0.2652011  | -0.3995040 |
| C | 0.6551495  | 1.8658299  | -0.1750163 |
| C | 1.1103632  | -0.4686855 | -0.1381801 |
| H | -1.2837049 | 2.3309118  | -0.4418433 |
| N | 1.5174969  | 0.8523804  | -0.0846020 |
| H | 1.8980376  | -1.1869745 | -0.0408862 |
| N | -0.6405500 | 1.5530686  | -0.3424239 |
| H | 2.5006518  | 1.0492507  | 0.0165165  |
| S | -2.8243404 | 0.0515593  | -0.5821602 |
| S | 1.1797867  | 3.5125043  | -0.0720110 |
| C | -0.6406719 | -2.2389326 | -0.3480097 |
| H | -1.3363487 | -2.4625903 | 0.4515957  |
| H | -1.1436965 | -2.4546219 | -1.2828766 |
| H | 0.2157000  | -2.8972485 | -0.2558233 |
| O | -4.7215893 | 2.8820757  | 0.4585472  |
| H | -5.4249994 | 2.8517143  | -0.1767872 |
| H | -4.2915936 | 2.0334308  | 0.3941908  |
| O | 4.3802646  | 1.0212063  | 0.2120453  |
| H | 4.5985569  | 1.7589098  | 0.7823458  |
| H | 4.8961626  | 1.1362925  | -0.5744745 |
| O | 4.6484417  | 3.4758266  | 1.6258919  |
| H | 3.8222702  | 3.8887079  | 1.3944521  |
| H | 5.3105813  | 4.1491764  | 1.5449399  |
| O | -2.2937175 | 3.8964531  | -0.6212791 |
| H | -3.1679509 | 3.7888602  | -0.2535638 |
| H | -1.8762652 | 4.5987897  | -0.1373573 |

point 5

|   |            |            |            |
|---|------------|------------|------------|
| C | -0.2234231 | -0.7981715 | -0.2952487 |
| C | -1.1816065 | 0.2596717  | -0.4115437 |
| C | 0.6360372  | 1.8599659  | -0.1755099 |
| C | 1.0961495  | -0.4723967 | -0.1301806 |
| H | -1.2980547 | 2.3335593  | -0.4462453 |
| N | 1.5019985  | 0.8524607  | -0.0782286 |
| H | 1.8823671  | -1.1904598 | -0.0241244 |
| N | -0.6552815 | 1.5554885  | -0.3484678 |
| H | 2.4839963  | 1.0532443  | 0.0265461  |
| S | -2.8459554 | 0.0560751  | -0.6163970 |
| S | 1.1687784  | 3.5122128  | -0.0699588 |
| C | -0.6589063 | -2.2379419 | -0.3503983 |
| H | -1.3635103 | -2.4581492 | 0.4423343  |
| H | -1.1530837 | -2.4546383 | -1.2897744 |
| H | 0.1954478  | -2.8975018 | -0.2478565 |
| O | -4.7387552 | 2.8474226  | 0.4310131  |
| H | -5.4357226 | 2.7992135  | -0.2103190 |
| H | -4.2949583 | 2.0044303  | 0.3777642  |
| O | 4.3619450  | 1.0439358  | 0.2253398  |
| H | 4.5999182  | 1.7834726  | 0.7848177  |
| H | 4.8888264  | 1.1260010  | -0.5579942 |
| O | 4.7588143  | 3.4988640  | 1.6210990  |
| H | 3.9653757  | 3.9824825  | 1.4163281  |
| H | 5.4721166  | 4.1179761  | 1.5409671  |
| O | -2.3117111 | 3.9050677  | -0.6010912 |
| H | -3.1963217 | 3.7648543  | -0.2701046 |
| H | -1.9366950 | 4.6066746  | -0.0826077 |

point 6

|   |            |            |            |
|---|------------|------------|------------|
| C | -0.2400061 | -0.7962644 | -0.2955293 |
| C | -1.1961520 | 0.2546536  | -0.4211525 |
| C | 0.6183160  | 1.8551403  | -0.1758148 |
| C | 1.0839205  | -0.4749327 | -0.1222028 |
| H | -1.3114200 | 2.3366532  | -0.4482215 |
| N | 1.4881863  | 0.8538312  | -0.0725191 |
| H | 1.8689418  | -1.1925061 | -0.0082051 |
| N | -0.6686816 | 1.5585613  | -0.3527530 |
| H | 2.4690721  | 1.0587866  | 0.0347208  |
| S | -2.8657425 | 0.0606887  | -0.6464393 |
| S | 1.1588951  | 3.5130718  | -0.0684853 |
| C | -0.6748264 | -2.2362792 | -0.3507760 |
| H | -1.3873478 | -2.4531775 | 0.4357841  |
| H | -1.1611001 | -2.4542064 | -1.2940181 |
| H | 0.1777063  | -2.8968149 | -0.2387947 |
| O | -4.7605061 | 2.8161549  | 0.3992423  |
| H | -5.4479235 | 2.7525230  | -0.2510192 |
| H | -4.3054962 | 1.9777267  | 0.3589571  |
| O | 4.3453672  | 1.0687775  | 0.2346955  |
| H | 4.6028429  | 1.8097525  | 0.7830002  |
| H | 4.8818679  | 1.1182975  | -0.5448308 |
| O | 4.8642432  | 3.5158670  | 1.6157101  |
| H | 4.1087127  | 4.0650616  | 1.4376915  |
| H | 5.6226479  | 4.0793949  | 1.5387764  |
| O | -2.3309628 | 3.9124107  | -0.5773479 |
| H | -3.2235300 | 3.7396488  | -0.2837069 |
| H | -1.9992396 | 4.6109937  | -0.0266031 |

point 7

|   |            |            |            |
|---|------------|------------|------------|
| C | -0.2547597 | -0.7934896 | -0.2943379 |
|---|------------|------------|------------|

|   |            |            |            |
|---|------------|------------|------------|
| C | -1.2090848 | 0.2503469  | -0.4280909 |
| C | 0.6021663  | 1.8513091  | -0.1756095 |
| C | 1.0736055  | -0.4763947 | -0.1142322 |
| H | -1.3236033 | 2.3403993  | -0.4472967 |
| N | 1.4761424  | 0.8563344  | -0.0673289 |
| H | 1.8576382  | -1.1933208 | 0.0067641  |
| N | -0.6806339 | 1.5624192  | -0.3549401 |
| H | 2.4559984  | 1.0655893  | 0.0411567  |
| S | -2.8838734 | 0.0658176  | -0.6719437 |
| S | 1.1505272  | 3.5149649  | -0.0671445 |
| C | -0.6887580 | -2.2338148 | -0.3492033 |
| H | -1.4081886 | -2.4475525 | 0.4319302  |
| H | -1.1681668 | -2.4530304 | -1.2956895 |
| H | 0.1621100  | -2.8951722 | -0.2288155 |
| O | -4.7863302 | 2.7873947  | 0.3626548  |
| H | -5.4609247 | 2.7110405  | -0.2995845 |
| H | -4.3225903 | 1.9524774  | 0.3367760  |
| O | 4.3306499  | 1.0951882  | 0.2401319  |
| H | 4.6075381  | 1.8371952  | 0.7769076  |
| H | 4.8752975  | 1.1127353  | -0.5351292 |
| O | 4.9644140  | 3.5276623  | 1.6093504  |
| H | 4.2507931  | 4.1366749  | 1.4585194  |
| H | 5.7619975  | 4.0351046  | 1.5375029  |
| O | -2.3512675 | 3.9186290  | -0.5495493 |
| H | -3.2493489 | 3.7133714  | -0.2938661 |
| H | -2.0635629 | 4.6119352  | 0.0312264  |

point 8

|   |            |            |            |
|---|------------|------------|------------|
| C | -0.2679172 | -0.7897196 | -0.2915693 |
| C | -1.2205487 | 0.2470160  | -0.4320476 |

|   |            |            |            |
|---|------------|------------|------------|
| C | 0.5876864  | 1.8484808  | -0.1744893 |
| C | 1.0650488  | -0.4768405 | -0.1062388 |
| H | -1.3344855 | 2.3450585  | -0.4428634 |
| N | 1.4658667  | 0.8598565  | -0.0624682 |
| H | 1.8482475  | -1.1930754 | 0.0206600  |
| N | -0.6910983 | 1.5672532  | -0.3545933 |
| H | 2.4448120  | 1.0734022  | 0.0460075  |
| S | -2.9006034 | 0.0719647  | -0.6924651 |
| S | 1.1439892  | 3.5178201  | -0.0653731 |
| C | -0.7011128 | -2.2303607 | -0.3457361 |
| H | -1.4264304 | -2.4411039 | 0.4307692  |
| H | -1.1748057 | -2.4507352 | -1.2948613 |
| H | 0.1482068  | -2.8925075 | -0.2181224 |
| O | -4.8155150 | 2.7600173  | 0.3204416  |
| H | -5.4737175 | 2.6739015  | -0.3569499 |
| H | -4.3453211 | 1.9276644  | 0.3099008  |
| O | 4.3178350  | 1.1226545  | 0.2416886  |
| H | 4.6141491  | 1.8652514  | 0.7665838  |
| H | 4.8690566  | 1.1088860  | -0.5290229 |
| O | 5.0592971  | 3.5349994  | 1.6016132  |
| H | 4.3904799  | 4.1977552  | 1.4786896  |
| H | 5.8904150  | 3.9865607  | 1.5362393  |
| O | -2.3725545 | 3.9238678  | -0.5171264 |
| H | -3.2736707 | 3.6861070  | -0.3000671 |
| H | -2.1295239 | 4.6096396  | 0.0915595  |

point 9

|   |            |            |            |
|---|------------|------------|------------|
| C | -0.2797942 | -0.7847683 | -0.2870829 |
| C | -1.2307769 | 0.2449871  | -0.4326301 |
| C | 0.5748820  | 1.8467244  | -0.1719681 |

|   |            |            |            |
|---|------------|------------|------------|
| C | 1.0580103  | -0.4762752 | -0.0981853 |
| H | -1.3440407 | 2.3509410  | -0.4341674 |
| N | 1.4572714  | 0.8643391  | -0.0577098 |
| H | 1.8404796  | -1.1918920 | 0.0333294  |
| N | -0.7001204 | 1.5733138  | -0.3511733 |
| H | 2.4354611  | 1.0820312  | 0.0494508  |
| S | -2.9162767 | 0.0797077  | -0.7074328 |
| S | 1.1395021  | 3.5216199  | -0.0624939 |
| C | -0.7123798 | -2.2256713 | -0.3404214 |
| H | -1.4425264 | -2.4336203 | 0.4323187  |
| H | -1.1816381 | -2.4468672 | -1.2915900 |
| H | 0.1354693  | -2.8887009 | -0.2069476 |
| O | -4.8470740 | 2.7326656  | 0.2715840  |
| H | -5.4848826 | 2.6399902  | -0.4242280 |
| H | -4.3723570 | 1.9021138  | 0.2767183  |
| O | 4.3068809  | 1.1507214  | 0.2394014  |
| H | 4.6227484  | 1.8934047  | 0.7520787  |
| H | 4.8630067  | 1.1063728  | -0.5266582 |
| O | 5.1490933  | 3.5385155  | 1.5920762  |
| H | 4.5269911  | 4.2488543  | 1.4979977  |
| H | 6.0084825  | 3.9349534  | 1.5340714  |
| O | -2.3949048 | 3.9282625  | -0.4794732 |
| H | -3.2965087 | 3.6578992  | -0.3018385 |
| H | -2.1972130 | 4.6041917  | 0.1551325  |

point 10

|   |            |            |            |
|---|------------|------------|------------|
| C | -0.2907793 | -0.7784094 | -0.2807071 |
| C | -1.2400913 | 0.2446206  | -0.4293617 |
| C | 0.5636524  | 1.8461582  | -0.1674816 |
| C | 1.0521719  | -0.4746567 | -0.0900394 |



|   |            |            |            |
|---|------------|------------|------------|
| H | -1.3523531 | 2.3583736  | -0.4202980 |
| N | 1.4501754  | 0.8697774  | -0.0528002 |
| H | 1.8339761  | -1.1898420 | 0.0445700  |
| N | -0.7078423 | 1.5808879  | -0.3440337 |
| H | 2.4277970  | 1.0913461  | 0.0516723  |
| S | -2.9313270 | 0.0896568  | -0.7161349 |
| S | 1.1371659  | 3.5263955  | -0.0577189 |
| C | -0.7231053 | -2.2194654 | -0.3333022 |
| H | -1.4569585 | -2.4248809 | 0.4366156  |
| H | -1.1893669 | -2.4409168 | -1.2859177 |
| H | 0.1233220  | -2.8835923 | -0.1955636 |
| O | -4.8796670 | 2.7038331  | 0.2148957  |
| H | -5.4925174 | 2.6080301  | -0.5026112 |
| H | -4.4018529 | 1.8745764  | 0.2354009  |
| O | 4.2976518  | 1.1790203  | 0.2332798  |
| H | 4.6333167  | 1.9212014  | 0.7334268  |
| H | 4.8569153  | 1.1049096  | -0.5282159 |
| O | 5.2341506  | 3.5387231  | 1.5803168  |
| H | 4.6598496  | 4.2905742  | 1.5161795  |
| H | 6.1169897  | 3.8812003  | 1.5301068  |
| O | -2.4185491 | 3.9319247  | -0.4359848 |
| H | -3.3179797 | 3.6287618  | -0.2988075 |
| H | -2.2669593 | 4.5956065  | 0.2226728  |

$1\pi_7\pi_8^*$  to  $1n_8\pi_8^*$

point 1

|   |            |            |            |
|---|------------|------------|------------|
| C | -0.2907794 | -0.7784096 | -0.2807072 |
| C | -1.2400916 | 0.2446207  | -0.4293618 |
| C | 0.5636526  | 1.8461587  | -0.1674816 |
| C | 1.0521722  | -0.4746568 | -0.0900394 |

|   |            |            |            |
|---|------------|------------|------------|
| H | -1.3523535 | 2.3583743  | -0.4202981 |
| N | 1.4501758  | 0.8697776  | -0.0528002 |
| H | 1.8339766  | -1.1898423 | 0.0445700  |
| N | -0.7078425 | 1.5808883  | -0.3440338 |
| H | 2.4277977  | 1.0913464  | 0.0516723  |
| S | -2.9313278 | 0.0896568  | -0.7161351 |
| S | 1.1371662  | 3.5263965  | -0.0577189 |
| C | -0.7231055 | -2.2194660 | -0.3333023 |
| H | -1.4569589 | -2.4248816 | 0.4366157  |
| H | -1.1893672 | -2.4409175 | -1.2859181 |
| H | 0.1233220  | -2.8835931 | -0.1955637 |
| O | -4.8796684 | 2.7038339  | 0.2148958  |
| H | -5.4925189 | 2.6080308  | -0.5026113 |
| H | -4.4018541 | 1.8745769  | 0.2354010  |
| O | 4.2976530  | 1.1790206  | 0.2332799  |
| H | 4.6333180  | 1.9212019  | 0.7334270  |
| H | 4.8569167  | 1.1049099  | -0.5282160 |
| O | 5.2341521  | 3.5387241  | 1.5803172  |
| H | 4.6598509  | 4.2905754  | 1.5161799  |
| H | 6.1169914  | 3.8812014  | 1.5301072  |
| O | -2.4185498 | 3.9319258  | -0.4359849 |
| H | -3.3179806 | 3.6287628  | -0.2988076 |
| H | -2.2669599 | 4.5956078  | 0.2226729  |

point 2

|   |            |            |            |
|---|------------|------------|------------|
| C | -0.2746579 | -0.7990895 | -0.3011104 |
| C | -1.2168961 | 0.2256463  | -0.4692484 |
| C | 0.5774614  | 1.8336509  | -0.1930990 |
| C | 1.0645740  | -0.4906177 | -0.0927871 |
| H | -1.3374742 | 2.3367848  | -0.4772158 |

|   |            |            |            |
|---|------------|------------|------------|
| N | 1.4595198  | 0.8548924  | -0.0586760 |
| H | 1.8454690  | -1.2037362 | 0.0573201  |
| N | -0.6935438 | 1.5612738  | -0.3863789 |
| H | 2.4353624  | 1.0762324  | 0.0585990  |
| S | -2.9088686 | 0.0656478  | -0.7801563 |
| S | 1.1402248  | 3.5122524  | -0.0913573 |
| C | -0.7068460 | -2.2406107 | -0.3515672 |
| H | -1.4520187 | -2.4429068 | 0.4085783  |
| H | -1.1563176 | -2.4700687 | -1.3105889 |
| H | 0.1371886  | -2.9035023 | -0.1958343 |
| O | -4.8522168 | 2.7848818  | 0.3661473  |
| H | -5.5037046 | 2.7287710  | -0.3210957 |
| H | -4.4061304 | 1.9389757  | 0.3490250  |
| O | 4.3101012  | 1.1552634  | 0.2672101  |
| H | 4.6182175  | 1.9050707  | 0.7740963  |
| H | 4.8694085  | 1.1062886  | -0.4962432 |
| O | 5.1356561  | 3.5587531  | 1.6065800  |
| H | 4.5101772  | 4.2648447  | 1.5024309  |
| H | 5.9936344  | 3.9565339  | 1.5377270  |
| O | -2.4056636 | 3.9077742  | -0.5313509 |
| H | -3.2942514 | 3.6399066  | -0.2932142 |
| H | -2.1706185 | 4.5909107  | 0.0823683  |

point 3

|   |            |            |            |
|---|------------|------------|------------|
| C | -0.2562370 | -0.8231896 | -0.3210302 |
| C | -1.1926330 | 0.2019274  | -0.5074554 |
| C | 0.5900807  | 1.8187669  | -0.2174186 |
| C | 1.0786979  | -0.5081789 | -0.0957116 |
| H | -1.3241513 | 2.3101126  | -0.5314582 |
| N | 1.4688020  | 0.8388990  | -0.0643102 |

|   |            |            |            |
|---|------------|------------|------------|
| H | 1.8595236  | -1.2181508 | 0.0690831  |
| N | -0.6798917 | 1.5375105  | -0.4268231 |
| H | 2.4424403  | 1.0613679  | 0.0653487  |
| S | -2.8849274 | 0.0345760  | -0.8417104 |
| S | 1.1400529  | 3.4962914  | -0.1233428 |
| C | -0.6863536 | -2.2657318 | -0.3698945 |
| H | -1.4420220 | -2.4664088 | 0.3805976  |
| H | -1.1191086 | -2.5033199 | -1.3348578 |
| H | 0.1560010  | -2.9262022 | -0.1970187 |
| O | -4.8126284 | 2.8862253  | 0.5159124  |
| H | -5.4969005 | 2.8721479  | -0.1411787 |
| H | -4.4091659 | 2.0210771  | 0.4708489  |
| O | 4.3216278  | 1.1343280  | 0.3002959  |
| H | 4.6004198  | 1.8917671  | 0.8131969  |
| H | 4.8798405  | 1.1122033  | -0.4651781 |
| O | 5.0249220  | 3.5797712  | 1.6297306  |
| H | 4.3491799  | 4.2314538  | 1.4857166  |
| H | 5.8523283  | 4.0342284  | 1.5411620  |
| O | -2.3964586 | 3.8762333  | -0.6224228 |
| H | -3.2654784 | 3.6522167  | -0.2888408 |
| H | -2.0801734 | 4.5739020  | -0.0630818 |

point 4

|   |            |            |            |
|---|------------|------------|------------|
| C | -0.2355706 | -0.8502657 | -0.3403538 |
| C | -1.1675178 | 0.1739354  | -0.5434260 |
| C | 0.6012407  | 1.8019754  | -0.2399624 |
| C | 1.0945288  | -0.5268931 | -0.0989565 |
| H | -1.3127796 | 2.2788041  | -0.5819768 |
| N | 1.4779043  | 0.8222513  | -0.0696519 |
| H | 1.8762337  | -1.2326418 | 0.0793731  |

|   |            |            |            |
|---|------------|------------|------------|
| N | -0.6671811 | 1.5100503  | -0.4646374 |
| H | 2.4489472  | 1.0472208  | 0.0717752  |
| S | -2.8598020 | -0.0031030 | -0.8998554 |
| S | 1.1362741  | 3.4789629  | -0.1529594 |
| C | -0.6615784 | -2.2944016 | -0.3883696 |
| H | -1.4267357 | -2.4951997 | 0.3527620  |
| H | -1.0778989 | -2.5399919 | -1.3587936 |
| H | 0.1799242  | -2.9512770 | -0.1995498 |
| O | -4.7597076 | 3.0068623  | 0.6622166  |
| H | -5.4699405 | 3.0359414  | 0.0335464  |
| H | -4.4078055 | 2.1213761  | 0.6003682  |
| O | 4.3322696  | 1.1167471  | 0.3319037  |
| H | 4.5799884  | 1.8815499  | 0.8502066  |
| H | 4.8878441  | 1.1233802  | -0.4357621 |
| O | 4.9014798  | 3.6004584  | 1.6496760  |
| H | 4.1775335  | 4.1885384  | 1.4665266  |
| H | 5.6918915  | 4.1124531  | 1.5402790  |
| O | -2.3915552 | 3.8377198  | -0.7075389 |
| H | -3.2326762 | 3.6652247  | -0.2853440 |
| H | -1.9975239 | 4.5441459  | -0.2113371 |

point 5

|   |            |            |            |
|---|------------|------------|------------|
| C | -0.2126835 | -0.8797882 | -0.3589364 |
| C | -1.1417470 | 0.1422325  | -0.5765783 |
| C | 0.6107003  | 1.7838134  | -0.2602670 |
| C | 1.1120905  | -0.5462415 | -0.1026515 |
| H | -1.3037395 | 2.2433900  | -0.6277240 |
| N | 1.4867482  | 0.8054656  | -0.0746604 |
| H | 1.8957393  | -1.2466969 | 0.0877190  |
| N | -0.6556868 | 1.4794264  | -0.4990891 |

|   |            |            |            |
|---|------------|------------|------------|
| H | 2.4548462  | 1.0343102  | 0.0777046  |
| S | -2.8337863 | -0.0468278 | -0.9535980 |
| S | 1.1285387  | 3.4607781  | -0.1795327 |
| C | -0.6324440 | -2.3260963 | -0.4070165 |
| H | -1.4058871 | -2.5289687 | 0.3252455  |
| H | -1.0328448 | -2.5793213 | -1.3824126 |
| H | 0.2091597  | -2.9782210 | -0.2037984 |
| O | -4.6925926 | 3.1455908  | 0.8028937  |
| H | -5.4215559 | 3.2173694  | 0.1993454  |
| H | -4.3990431 | 2.2402593  | 0.7365386  |
| O | 4.3421299  | 1.1030847  | 0.3613297  |
| H | 4.5570720  | 1.8746836  | 0.8845585  |
| H | 4.8930871  | 1.1405347  | -0.4087738 |
| O | 4.7650775  | 3.6192274  | 1.6664427  |
| H | 3.9963759  | 4.1341666  | 1.4454468  |
| H | 5.5113556  | 4.1889446  | 1.5351859  |
| O | -2.3915803 | 3.7927422  | -0.7850455 |
| H | -3.1969684 | 3.6784279  | -0.2822564 |
| H | -1.9245748 | 4.5015381  | -0.3599110 |

point 6

|   |            |            |            |
|---|------------|------------|------------|
| C | -0.1875826 | -0.9111407 | -0.3766112 |
| C | -1.1154995 | 0.1074674  | -0.6063245 |
| C | 0.6182502  | 1.7648785  | -0.2778960 |
| C | 1.1314339  | -0.5656328 | -0.1069157 |
| H | -1.2973870 | 2.2044751  | -0.6676784 |
| N | 1.4952887  | 0.7891167  | -0.0793087 |
| H | 1.9182091  | -1.2597322 | 0.0936680  |
| N | -0.6456587 | 1.4462458  | -0.5294607 |
| H | 2.4601411  | 1.0232025  | 0.0829380  |

|   |            |            |            |
|---|------------|------------|------------|
| S | -2.8071691 | -0.0959356 | -1.0019221 |
| S | 1.1165344  | 3.4422965  | -0.2024440 |
| C | -0.5988656 | -2.3601904 | -0.4258068 |
| H | -1.3791830 | -2.5672699 | 0.2982923  |
| H | -0.9841152 | -2.6204621 | -1.4056863 |
| H | 0.2439219  | -3.0064306 | -0.2100753 |
| O | -4.6108267 | 3.3010286  | 0.9355888  |
| H | -5.3514735 | 3.4131174  | 0.3524968  |
| H | -4.3801087 | 2.3779444  | 0.8778055  |
| O | 4.3513694  | 1.0939330  | 0.3878143  |
| H | 4.5318995  | 1.8714374  | 0.9156570  |
| H | 4.8952705  | 1.1643540  | -0.3850053 |
| O | 4.6157671  | 3.6342158  | 1.6802046  |
| H | 3.8074024  | 4.0664138  | 1.4231447  |
| H | 5.3100970  | 4.2609774  | 1.5262800  |
| O | -2.3971469 | 3.7418809  | -0.8533315 |
| H | -3.1595863 | 3.6913166  | -0.2790216 |
| H | -1.8631957 | 4.4463164  | -0.5062433 |

point 7

|   |            |            |            |
|---|------------|------------|------------|
| C | -0.1602691 | -0.9436285 | -0.3932017 |
| C | -1.0889403 | 0.0703621  | -0.6320874 |
| C | 0.6237120  | 1.7458130  | -0.2924447 |
| C | 1.1526209  | -0.5844106 | -0.1118623 |
| H | -1.2940451 | 2.1627180  | -0.7008589 |
| N | 1.5035057  | 0.7738278  | -0.0835846 |
| H | 1.9438177  | -1.2710955 | 0.0967843  |
| N | -0.6373201 | 1.4111729  | -0.5550623 |
| H | 2.4648647  | 1.0145023  | 0.0872560  |
| S | -2.7802324 | -0.1496778 | -1.0438148 |

|   |            |            |            |
|---|------------|------------|------------|
| S | 1.0999918  | 3.4241062  | -0.2211291 |
| C | -0.5607691 | -2.3959612 | -0.4446771 |
| H | -1.3463308 | -2.6095232 | 0.2721901  |
| H | -0.9319082 | -2.6624943 | -1.4285569 |
| H | 0.2844118  | -3.0352045 | -0.2186447 |
| O | -4.5144247 | 3.4716548  | 1.0577456  |
| H | -5.2604866 | 3.6194195  | 0.4894299  |
| H | -4.3485488 | 2.5344640  | 1.0221289  |
| O | 4.3601869  | 1.0899050  | 0.4105591  |
| H | 4.5047682  | 1.8720796  | 0.9428970  |
| H | 4.8941195  | 1.1954786  | -0.3652352 |
| O | 4.4540045  | 3.6432932  | 1.6913085  |
| H | 3.6129483  | 3.9834687  | 1.4003452  |
| H | 5.0879954  | 4.3253613  | 1.5142897  |
| O | -2.4088317 | 3.6857583  | -0.9108446 |
| H | -3.1218717 | 3.7033883  | -0.2750179 |
| H | -1.8151818 | 4.3790458  | -0.6477535 |

point 8

|   |            |            |            |
|---|------------|------------|------------|
| C | -0.1307546 | -0.9764946 | -0.4085394 |
| C | -1.0622252 | 0.0316913  | -0.6533172 |
| C | 0.6269347  | 1.7272815  | -0.3035370 |
| C | 1.1757047  | -0.6018682 | -0.1176070 |
| H | -1.2939951 | 2.1188051  | -0.7263295 |
| N | 1.5113900  | 0.7602514  | -0.0874884 |
| H | 1.9727175  | -1.2800791 | 0.0966400  |
| N | -0.6308667 | 1.3749057  | -0.5752363 |
| H | 2.4690619  | 1.0088337  | 0.0904287  |
| S | -2.7532485 | -0.2072417 | -1.0782928 |
| S | 1.0786889  | 3.4067959  | -0.2350622 |



|   |            |            |            |
|---|------------|------------|------------|
| C | -0.5181140 | -2.4326016 | -0.4635578 |
| H | -1.3070619 | -2.6550278 | 0.2472305  |
| H | -0.8764699 | -2.7044366 | -1.4509644 |
| H | 0.3307870  | -3.0637533 | -0.2297527 |
| O | -4.4039322 | 3.6558648  | 1.1665763  |
| H | -5.1504936 | 3.8321747  | 0.6068494  |
| H | -4.3022912 | 2.7096956  | 1.1670041  |
| O | 4.3687936  | 1.0916190  | 0.4287486  |
| H | 4.4760260  | 1.8768614  | 0.9656903  |
| H | 4.8893725  | 1.2344792  | -0.3501957 |
| O | 4.2807581  | 3.6440888  | 1.7002954  |
| H | 3.4160441  | 3.8837673  | 1.3777970  |
| H | 4.8456147  | 4.3784725  | 1.5003091  |
| O | -2.4271530 | 3.6250038  | -0.9560895 |
| H | -3.0852839 | 3.7141443  | -0.2695655 |
| H | -1.7822168 | 4.3005907  | -0.7818752 |

point 9

|   |            |            |            |
|---|------------|------------|------------|
| C | -0.0990791 | -1.0089443 | -0.4224882 |
| C | -1.0355065 | -0.0077437 | -0.6695080 |
| C | 0.6277901  | 1.7099393  | -0.3108112 |
| C | 1.2007063  | -0.6172754 | -0.1242795 |
| H | -1.2974682 | 2.0734200  | -0.7431913 |
| N | 1.5189265  | 0.7490406  | -0.0910249 |
| H | 2.0050056  | -1.2859451 | 0.0928002  |
| N | -0.6264662 | 1.3381472  | -0.5893560 |
| H | 2.4727689  | 1.0068114  | 0.0922323  |
| S | -2.7264771 | -0.2677751 | -1.1044325 |
| S | 1.0524535  | 3.3909214  | -0.2437178 |
| C | -0.4709180 | -2.4692416 | -0.4824180 |

|   |            |            |            |
|---|------------|------------|------------|
| H | -1.2611588 | -2.7029885 | 0.2236499  |
| H | -0.8181140 | -2.7452612 | -1.4728899 |
| H | 0.3831261  | -3.0912199 | -0.2436750 |
| O | -4.2804688 | 3.8520341  | 1.2590067  |
| H | -5.0244982 | 4.0470738  | 0.7018526  |
| H | -4.2396743 | 2.9034482  | 1.3094695  |
| O | 4.3773804  | 1.0996696  | 0.4415814  |
| H | 4.4460480  | 1.8859871  | 0.9835036  |
| H | 4.8807680  | 1.2818270  | -0.3405298 |
| O | 4.0976194  | 3.6340427  | 1.7079169  |
| H | 3.2204234  | 3.7661524  | 1.3562298  |
| H | 4.5843959  | 4.4163336  | 1.4858214  |
| O | -2.4525432 | 3.5602166  | -0.9876045 |
| H | -3.0514098 | 3.7230686  | -0.2619085 |
| H | -1.7658431 | 4.2120847  | -0.9060703 |

point 10

|   |            |            |            |
|---|------------|------------|------------|
| C | -0.0653303 | -1.0401780 | -0.4349753 |
| C | -1.0089386 | -0.0471474 | -0.6802155 |
| C | 0.6261675  | 1.6943952  | -0.3138908 |
| C | 1.2275887  | -0.6299144 | -0.1320378 |
| H | -1.3046349 | 2.0272099  | -0.7505613 |
| N | 1.5260761  | 0.7408110  | -0.0941885 |
| H | 2.0406886  | -1.2879636 | 0.0848006  |
| N | -0.6242584 | 1.3015710  | -0.5968130 |
| H | 2.4759900  | 1.0090000  | 0.0924765  |
| S | -2.7001607 | -0.3304126 | -1.1214050 |
| S | 1.0211662  | 3.3769636  | -0.2465056 |
| C | -0.4192841 | -2.5049784 | -0.5013290 |
| H | -1.2084836 | -2.7525561 | 0.2015491  |

|   |            |            |            |
|---|------------|------------|------------|
| H | -0.7572420 | -2.7839105 | -1.4944197 |
| H | 0.4413932  | -3.1167116 | -0.2607876 |
| O | -4.1457428 | 4.0585885  | 1.3315804  |
| H | -4.8865627 | 4.2597200  | 0.7720443  |
| H | -4.1594103 | 3.1156214  | 1.4460882  |
| O | 4.3860809  | 1.1145845  | 0.4483140  |
| H | 4.4152106  | 1.8995663  | 0.9959116  |
| H | 4.8680326  | 1.3378582  | -0.3367340 |
| O | 3.9068954  | 3.6104856  | 1.7151451  |
| H | 3.0304613  | 3.6300442  | 1.3363055  |
| H | 4.3068352  | 4.4347486  | 1.4727081  |
| O | -2.4853193 | 3.4919302  | -1.0039148 |
| H | -3.0219795 | 3.7295832  | -0.2511582 |
| H | -1.7674523 | 4.1149151  | -1.0178287 |

### III. aqueous solution

#### Snapshot1

FC point to  ${}^1n_7\pi_7^*$

point 1

|   |              |              |              |
|---|--------------|--------------|--------------|
| C | -0.143000013 | -0.807000057 | -0.157000010 |
| C | -1.103000082 | 0.289000021  | -0.158000013 |
| C | 0.743000053  | 1.851001135  | 0.155000012  |
| C | 1.163000082  | -0.483000036 | -0.027000004 |
| H | -1.207000086 | 2.324001166  | -0.030000000 |
| N | 1.591000112  | 0.810000058  | 0.110000006  |
| H | 1.947000138  | -1.214000090 | -0.031000002 |
| N | -0.572000039 | 1.533000111  | 0.011000002  |
| H | 2.583001186  | 0.994000073  | 0.104000009  |
| S | -2.733001198 | 0.063000007  | -0.346000025 |
| S | 1.252000091  | 3.460001249  | 0.381000026  |

|   |              |              |              |
|---|--------------|--------------|--------------|
| C | -0.599000044 | -2.232001161 | -0.294000021 |
| H | -1.228000088 | -2.520001179 | 0.540000040  |
| H | -1.182000085 | -2.367001172 | -1.195000087 |
| H | 0.254000021  | -2.900001208 | -0.328000024 |
| O | -4.862001351 | 2.949001212  | -0.097000005 |
| H | -5.267002380 | 2.918001209  | -0.954000067 |
| H | -4.444001321 | 2.101001153  | 0.013000001  |
| O | 4.438001319  | 1.113000082  | -0.243000018 |
| H | 4.692001340  | 1.800000127  | 0.375000029  |
| H | 4.651001337  | 1.449000102  | -1.102000080 |
| O | 4.501001326  | 3.321001239  | 1.496000106  |
| H | 3.567001259  | 3.470001249  | 1.377000097  |
| H | 4.921001355  | 4.159001298  | 1.362000097  |
| O | -2.133001152 | 3.833001278  | -0.295000023 |
| H | -3.078001221 | 3.831001274  | -0.160000012 |
| H | -1.761000129 | 4.571001332  | 0.166000014  |

point 2

|   |              |              |              |
|---|--------------|--------------|--------------|
| C | -0.149382012 | -0.814342058 | -0.157221011 |
| C | -1.103149077 | 0.285284022  | -0.162836010 |
| C | 0.749726055  | 1.840458130  | 0.124663010  |
| C | 1.159347082  | -0.496600034 | -0.030675003 |
| H | -1.201388087 | 2.321076165  | -0.048340003 |
| N | 1.595394114  | 0.794417058  | 0.096941007  |
| H | 1.938520141  | -1.232417088 | -0.031230004 |
| N | -0.569885040 | 1.528963108  | -0.003883002 |
| H | 2.586973185  | 0.973190072  | 0.079530006  |
| S | -2.737860198 | 0.065048002  | -0.346938024 |
| S | 1.265536091  | 3.449560248  | 0.388100028  |
| C | -0.612236042 | -2.237800160 | -0.285032022 |

|   |              |              |              |
|---|--------------|--------------|--------------|
| H | -1.240795091 | -2.519393181 | 0.551379039  |
| H | -1.196650088 | -2.376292170 | -1.184636087 |
| H | 0.237729016  | -2.909642209 | -0.316495023 |
| O | -4.854348348 | 2.956623211  | -0.102401005 |
| H | -5.258083378 | 2.916096208  | -0.959136071 |
| H | -4.448293319 | 2.107051151  | 0.023416003  |
| O | 4.445590319  | 1.116866082  | -0.252301018 |
| H | 4.694655338  | 1.804055128  | 0.366888027  |
| H | 4.678380338  | 1.444625103  | -1.107261081 |
| O | 4.513100323  | 3.323100237  | 1.499900106  |
| H | 3.570052257  | 3.449338248  | 1.445739105  |
| H | 4.896690354  | 4.172518300  | 1.332100096  |
| O | -2.123274154 | 3.844572279  | -0.297167020 |
| H | -3.068517222 | 3.830226278  | -0.170762011 |
| H | -1.767316130 | 4.580525331  | 0.176016011  |

point 3

|   |              |              |              |
|---|--------------|--------------|--------------|
| C | -0.155764011 | -0.821683058 | -0.157441011 |
| C | -1.103297077 | 0.281568023  | -0.167673013 |
| C | 0.756452056  | 1.829916131  | 0.094326009  |
| C | 1.155693081  | -0.510200037 | -0.034350001 |
| H | -1.195776088 | 2.318150169  | -0.066680006 |
| N | 1.599787116  | 0.778834058  | 0.083882008  |
| H | 1.930039139  | -1.250834091 | -0.031461000 |
| N | -0.567769040 | 1.524925109  | -0.018766001 |
| H | 2.590945184  | 0.952379070  | 0.055060004  |
| S | -2.742720199 | 0.067097003  | -0.347876028 |
| S | 1.279072090  | 3.439119248  | 0.395199026  |
| C | -0.625471046 | -2.243600160 | -0.276064018 |
| H | -1.253590089 | -2.518785183 | 0.562758038  |

|   |              |              |              |
|---|--------------|--------------|--------------|
| H | -1.211299085 | -2.385584173 | -1.174271087 |
| H | 0.221457017  | -2.919284210 | -0.304989021 |
| O | -4.846694349 | 2.964246216  | -0.107802010 |
| H | -5.249165376 | 2.914191207  | -0.964272070 |
| H | -4.452584322 | 2.113102150  | 0.033832000  |
| O | 4.453178318  | 1.120731081  | -0.261602017 |
| H | 4.697309337  | 1.808110128  | 0.358777026  |
| H | 4.705759340  | 1.440249103  | -1.112522081 |
| O | 4.525300325  | 3.325200240  | 1.503900109  |
| H | 3.578800255  | 3.426800245  | 1.517600111  |
| H | 4.873800353  | 4.183000302  | 1.300500091  |
| O | -2.113547151 | 3.856144279  | -0.299333022 |
| H | -3.059034222 | 3.829451277  | -0.181524016 |
| H | -1.773632130 | 4.590048331  | 0.186032013  |

point 4

|   |              |              |              |
|---|--------------|--------------|--------------|
| C | -0.162145010 | -0.829024059 | -0.157662011 |
| C | -1.103445078 | 0.277853018  | -0.172510010 |
| C | 0.763178053  | 1.819374132  | 0.063989002  |
| C | 1.152039080  | -0.523801036 | -0.038025005 |
| H | -1.190163084 | 2.315225168  | -0.085020009 |
| N | 1.604181113  | 0.763251053  | 0.070823003  |
| H | 1.921558137  | -1.269250089 | -0.031691002 |
| N | -0.565654040 | 1.520888111  | -0.033649000 |
| H | 2.594917189  | 0.931569069  | 0.030590001  |
| S | -2.747579200 | 0.069145003  | -0.348814026 |
| S | 1.292609095  | 3.428679247  | 0.402299029  |
| C | -0.638706044 | -2.249400159 | -0.267095020 |
| H | -1.266385092 | -2.518178180 | 0.574137042  |
| H | -1.225949087 | -2.394876171 | -1.163907081 |

|   |              |              |              |
|---|--------------|--------------|--------------|
| H | 0.205185012  | -2.928925211 | -0.293483020 |
| O | -4.839041351 | 2.971868215  | -0.113204010 |
| H | -5.240246380 | 2.912285211  | -0.969409068 |
| H | -4.456875320 | 2.119152154  | 0.044248002  |
| O | 4.460767323  | 1.124597081  | -0.270903021 |
| H | 4.699963341  | 1.812165129  | 0.350665024  |
| H | 4.733137341  | 1.435874104  | -1.117784082 |
| O | 4.537400328  | 3.327300237  | 1.507800108  |
| H | 3.592100257  | 3.403100243  | 1.591400112  |
| H | 4.845300348  | 4.191100301  | 1.267500090  |
| O | -2.103821154 | 3.867716280  | -0.301500024 |
| H | -3.049550218 | 3.828676276  | -0.192286015 |
| H | -1.779947130 | 4.599572331  | 0.196047015  |

point 5

|   |              |              |              |
|---|--------------|--------------|--------------|
| C | -0.168527010 | -0.836366060 | -0.157883012 |
| C | -1.103593078 | 0.274137019  | -0.177346013 |
| C | 0.769903054  | 1.808831132  | 0.033651000  |
| C | 1.148385085  | -0.537401039 | -0.041700003 |
| H | -1.184551085 | 2.312300168  | -0.103360006 |
| N | 1.608574115  | 0.747668053  | 0.057765004  |
| H | 1.913077140  | -1.287667093 | -0.031921004 |
| N | -0.563538040 | 1.516850108  | -0.048532004 |
| H | 2.598889188  | 0.910758068  | 0.006118998  |
| S | -2.752439196 | 0.071194004  | -0.349752024 |
| S | 1.306145095  | 3.418238247  | 0.409398032  |
| C | -0.651941047 | -2.255200164 | -0.258127021 |
| H | -1.279180090 | -2.517570181 | 0.585515041  |
| H | -1.240598089 | -2.404168174 | -1.153542081 |
| H | 0.188914013  | -2.938566212 | -0.281978019 |

|   |              |             |              |
|---|--------------|-------------|--------------|
| O | -4.831387347 | 2.979491214 | -0.118605010 |
| H | -5.231328378 | 2.910380210 | -0.974545072 |
| H | -4.461167323 | 2.125203153 | 0.054665005  |
| O | 4.468356323  | 1.128462080 | -0.280204021 |
| H | 4.702617339  | 1.816220130 | 0.342553023  |
| H | 4.760516342  | 1.431499104 | -1.123045083 |
| O | 4.549600329  | 3.329400240 | 1.511700107  |
| H | 3.610500258  | 3.378400244 | 1.666300119  |
| H | 4.807500344  | 4.193500300 | 1.235800086  |
| O | -2.094094151 | 3.879287280 | -0.303666020 |
| H | -3.040067219 | 3.827901274 | -0.203048015 |
| H | -1.786263130 | 4.609095331 | 0.206063012  |

point 6

|   |              |              |              |
|---|--------------|--------------|--------------|
| C | -0.174909014 | -0.843707061 | -0.158103012 |
| C | -1.103741078 | 0.270421020  | -0.182182011 |
| C | 0.776629056  | 1.798289128  | 0.003313999  |
| C | 1.144731084  | -0.551001037 | -0.045375002 |
| H | -1.178938086 | 2.309375167  | -0.121700009 |
| N | 1.612968117  | 0.732085053  | 0.044706005  |
| H | 1.904596138  | -1.306084096 | -0.032152000 |
| N | -0.561423040 | 1.512812110  | -0.063415003 |
| H | 2.602862187  | 0.889948067  | -0.018350999 |
| S | -2.757299197 | 0.073243005  | -0.350690023 |
| S | 1.319681094  | 3.407797246  | 0.416498029  |
| C | -0.665177046 | -2.260999164 | -0.249159017 |
| H | -1.291975093 | -2.516963183 | 0.596894045  |
| H | -1.255248091 | -2.413459172 | -1.143177081 |
| H | 0.172642014  | -2.948208213 | -0.270472017 |
| O | -4.823733348 | 2.987113213  | -0.124006010 |



|   |              |             |              |
|---|--------------|-------------|--------------|
| H | -5.222410376 | 2.908475209 | -0.979681071 |
| H | -4.465458321 | 2.131254152 | 0.065081007  |
| O | 4.475944323  | 1.132328080 | -0.289505020 |
| H | 4.705271338  | 1.820274130 | 0.334442022  |
| H | 4.787895343  | 1.427123105 | -1.128306079 |
| O | 4.561700327  | 3.331500238 | 1.515700111  |
| H | 3.636900260  | 3.353100242 | 1.740400127  |
| H | 4.769800344  | 4.195700301 | 1.203800087  |
| O | -2.084367148 | 3.890858280 | -0.305833022 |
| H | -3.030583219 | 3.827126273 | -0.213810014 |
| H | -1.792579131 | 4.618619330 | 0.216079015  |

point 7

|   |              |              |              |
|---|--------------|--------------|--------------|
| C | -0.181291014 | -0.851048062 | -0.158324012 |
| C | -1.103890079 | 0.266705021  | -0.187019013 |
| C | 0.783355057  | 1.787747129  | -0.027023002 |
| C | 1.141077084  | -0.564601041 | -0.049050005 |
| H | -1.173326082 | 2.306450166  | -0.140040012 |
| N | 1.617361114  | 0.716502053  | 0.031647001  |
| H | 1.896116136  | -1.324500094 | -0.032382002 |
| N | -0.559307040 | 1.508775107  | -0.078298008 |
| H | 2.606834186  | 0.869137060  | -0.042821002 |
| S | -2.762158197 | 0.075291006  | -0.351628027 |
| S | 1.333217093  | 3.397356246  | 0.423597032  |
| C | -0.678412049 | -2.266799163 | -0.240191019 |
| H | -1.304770096 | -2.516355180 | 0.608273044  |
| H | -1.269897093 | -2.422751175 | -1.132813081 |
| H | 0.156371009  | -2.957849214 | -0.258966021 |
| O | -4.816080344 | 2.994736218  | -0.129408010 |
| H | -5.213492374 | 2.906570208  | -0.984817069 |

|   |              |             |              |
|---|--------------|-------------|--------------|
| H | -4.469749324 | 2.137304151 | 0.075497004  |
| O | 4.483533322  | 1.136193079 | -0.298806019 |
| H | 4.707925336  | 1.824329131 | 0.326330025  |
| H | 4.815273349  | 1.422748100 | -1.133567080 |
| O | 4.573900329  | 3.333600240 | 1.519600110  |
| H | 3.669200266  | 3.327800241 | 1.812600129  |
| H | 4.725500339  | 4.197600302 | 1.173500086  |
| O | -2.074641151 | 3.902430281 | -0.307999024 |
| H | -3.021100215 | 3.826351277 | -0.224573014 |
| H | -1.798894131 | 4.628142335 | 0.226095017  |

point 8

|   |              |              |              |
|---|--------------|--------------|--------------|
| C | -0.187673013 | -0.858390063 | -0.158545012 |
| C | -1.104038079 | 0.262989017  | -0.191855016 |
| C | 0.790081059  | 1.777205129  | -0.057360004 |
| C | 1.137424083  | -0.578201039 | -0.052725004 |
| H | -1.167714083 | 2.303525165  | -0.158380009 |
| N | 1.621754116  | 0.700919053  | 0.018588002  |
| H | 1.887635134  | -1.342917098 | -0.032612003 |
| N | -0.557192041 | 1.504737109  | -0.093182007 |
| H | 2.610806186  | 0.848326059  | -0.067291004 |
| S | -2.767018198 | 0.077340006  | -0.352566025 |
| S | 1.346753098  | 3.386915245  | 0.430697030  |
| C | -0.691648047 | -2.272599163 | -0.231223015 |
| H | -1.317565094 | -2.515748182 | 0.619652043  |
| H | -1.284547090 | -2.432043173 | -1.122448081 |
| H | 0.140099010  | -2.967490215 | -0.247461020 |
| O | -4.808426346 | 3.002358217  | -0.134809010 |
| H | -5.204573377 | 2.904665207  | -0.989953073 |
| H | -4.474041322 | 2.143355155  | 0.085913006  |

|   |              |             |              |
|---|--------------|-------------|--------------|
| O | 4.491121322  | 1.140059084 | -0.308107024 |
| H | 4.710579340  | 1.828384131 | 0.318218024  |
| H | 4.842652350  | 1.418372101 | -1.138828080 |
| O | 4.586000331  | 3.335700238 | 1.523600108  |
| H | 3.702900268  | 3.303000238 | 1.883000134  |
| H | 4.679200336  | 4.195100304 | 1.146800083  |
| O | -2.064914148 | 3.914001281 | -0.310166021 |
| H | -3.011616215 | 3.825576276 | -0.235335018 |
| H | -1.805210131 | 4.637666335 | 0.236111014  |

point 9

|   |              |              |              |
|---|--------------|--------------|--------------|
| C | -0.194055012 | -0.865731064 | -0.158765012 |
| C | -1.104186079 | 0.259274018  | -0.196692014 |
| C | 0.796806055  | 1.766662125  | -0.087697005 |
| C | 1.133770083  | -0.591802043 | -0.056400002 |
| H | -1.162101084 | 2.300600164  | -0.176720012 |
| N | 1.626148118  | 0.685336048  | 0.005529003  |
| H | 1.879154137  | -1.361334096 | -0.032843005 |
| N | -0.555077041 | 1.500700111  | -0.108065006 |
| H | 2.614778190  | 0.827516058  | -0.091761007 |
| S | -2.771877199 | 0.079388007  | -0.353504023 |
| S | 1.360289098  | 3.376475245  | 0.437796032  |
| C | -0.704883051 | -2.278399163 | -0.222254016 |
| H | -1.330360097 | -2.515140178 | 0.631030047  |
| H | -1.299196092 | -2.441334176 | -1.112084081 |
| H | 0.123828011  | -2.977132216 | -0.235955018 |
| O | -4.800772347 | 3.009981217  | -0.140210010 |
| H | -5.195655375 | 2.902760211  | -0.995089072 |
| H | -4.478332320 | 2.149405154  | 0.096329008  |
| O | 4.498710322  | 1.143924084  | -0.317408023 |

|   |              |             |              |
|---|--------------|-------------|--------------|
| H | 4.713233338  | 1.832438132 | 0.310106023  |
| H | 4.870031351  | 1.413997101 | -1.144089081 |
| O | 4.598100329  | 3.337700242 | 1.527500112  |
| H | 3.744900267  | 3.279400234 | 1.948000140  |
| H | 4.623100335  | 4.191000303 | 1.126800083  |
| O | -2.055188146 | 3.925573281 | -0.312333023 |
| H | -3.002133216 | 3.824801275 | -0.246097018 |
| H | -1.811526132 | 4.647189335 | 0.246126017  |

point 10

|   |              |              |              |
|---|--------------|--------------|--------------|
| C | -0.200436017 | -0.873072064 | -0.158986013 |
| C | -1.104334079 | 0.255558019  | -0.201528016 |
| C | 0.803532057  | 1.756120125  | -0.118035007 |
| C | 1.130116082  | -0.605402046 | -0.060075006 |
| H | -1.156489085 | 2.297674163  | -0.195060015 |
| N | 1.630541115  | 0.669753048  | -0.007530002 |
| H | 1.870673135  | -1.379750099 | -0.033073001 |
| N | -0.552961041 | 1.496662107  | -0.122948010 |
| H | 2.618750189  | 0.806705056  | -0.116231010 |
| S | -2.776737200 | 0.081436008  | -0.354442027 |
| S | 1.373825097  | 3.366034244  | 0.444896030  |
| C | -0.718118054 | -2.284198162 | -0.213286017 |
| H | -1.343155095 | -2.514533180 | 0.642409046  |
| H | -1.313846095 | -2.450626174 | -1.101719081 |
| H | 0.107556006  | -2.986773217 | -0.224449017 |
| O | -4.793119344 | 3.017603216  | -0.145611010 |
| H | -5.186737373 | 2.900854210  | -1.000225070 |
| H | -4.482623323 | 2.155456153  | 0.106745010  |
| O | 4.506298327  | 1.147790083  | -0.326709022 |
| H | 4.715887337  | 1.836493132  | 0.301995021  |

|   |              |             |              |
|---|--------------|-------------|--------------|
| H | 4.897410353  | 1.409622102 | -1.149350082 |
| O | 4.610288334  | 3.339839240 | 1.531428110  |
| H | 3.792351274  | 3.257206234 | 2.006956142  |
| H | 4.568689330  | 4.189183304 | 1.107968077  |
| O | -2.045461148 | 3.937144282 | -0.314499025 |
| H | -2.992649217 | 3.824026273 | -0.256859017 |
| H | -1.817841132 | 4.656713335 | 0.256142019  |

**FC point to  ${}^1\pi_7\pi_8^*$**

point 1

|   |              |              |              |
|---|--------------|--------------|--------------|
| C | -0.143000013 | -0.807000057 | -0.157000010 |
| C | -1.103000082 | 0.289000021  | -0.158000013 |
| C | 0.743000053  | 1.851001135  | 0.155000012  |
| C | 1.163000082  | -0.483000036 | -0.027000004 |
| H | -1.207000086 | 2.324001166  | -0.030000000 |
| N | 1.591000112  | 0.810000058  | 0.110000006  |
| H | 1.947000138  | -1.214000090 | -0.031000002 |
| N | -0.572000039 | 1.533000111  | 0.011000002  |
| H | 2.583001186  | 0.994000073  | 0.104000009  |
| S | -2.733001198 | 0.063000007  | -0.346000025 |
| S | 1.252000091  | 3.460001249  | 0.381000026  |
| C | -0.599000044 | -2.232001161 | -0.294000021 |
| H | -1.228000088 | -2.520001179 | 0.540000040  |
| H | -1.182000085 | -2.367001172 | -1.195000087 |
| H | 0.254000021  | -2.900001208 | -0.328000024 |
| O | -4.862001351 | 2.949001212  | -0.097000005 |
| H | -5.267002380 | 2.918001209  | -0.954000067 |
| H | -4.444001321 | 2.101001153  | 0.013000001  |
| O | 4.438001319  | 1.113000082  | -0.243000018 |
| H | 4.692001340  | 1.800000127  | 0.375000029  |

|   |              |             |              |
|---|--------------|-------------|--------------|
| H | 4.651001337  | 1.449000102 | -1.102000080 |
| O | 4.501001326  | 3.321001239 | 1.496000106  |
| H | 3.567001259  | 3.470001249 | 1.377000097  |
| H | 4.921001355  | 4.159001298 | 1.362000097  |
| O | -2.133001152 | 3.833001278 | -0.295000023 |
| H | -3.078001221 | 3.831001274 | -0.160000012 |
| H | -1.761000129 | 4.571001332 | 0.166000014  |

point 2

|   |              |              |              |
|---|--------------|--------------|--------------|
| C | -0.149928012 | -0.811305057 | -0.156993009 |
| C | -1.109461082 | 0.278160021  | -0.160228013 |
| C | 0.735902051  | 1.839565133  | 0.151023012  |
| C | 1.160965083  | -0.492668035 | -0.024306000 |
| H | -1.209196087 | 2.321607168  | -0.030227001 |
| N | 1.588214116  | 0.804435061  | 0.110702007  |
| H | 1.944393141  | -1.223685087 | -0.025184000 |
| N | -0.574991039 | 1.530259110  | 0.009447999  |
| H | 2.579441183  | 0.991525074  | 0.103939006  |
| S | -2.746128196 | 0.063641004  | -0.350032023 |
| S | 1.254045091  | 3.454441247  | 0.376701027  |
| C | -0.605624041 | -2.236407159 | -0.293780021 |
| H | -1.234531088 | -2.523172184 | 0.540655040  |
| H | -1.190057084 | -2.369837171 | -1.194011086 |
| H | 0.246696020  | -2.905536212 | -0.328657024 |
| O | -4.843961350 | 2.940237211  | -0.100945005 |
| H | -5.252951380 | 2.900581208  | -0.955174068 |
| H | -4.425426316 | 2.092450151  | 0.014394002  |
| O | 4.432340318  | 1.125597083  | -0.236255019 |
| H | 4.693014338  | 1.815145133  | 0.374973025  |
| H | 4.668244335  | 1.436366101  | -1.093471081 |

|   |              |             |              |
|---|--------------|-------------|--------------|
| O | 4.518698325  | 3.342367242 | 1.492308106  |
| H | 3.593819258  | 3.520497252 | 1.379962098  |
| H | 4.959598358  | 4.161909302 | 1.404096100  |
| O | -2.126491155 | 3.840625278 | -0.294127023 |
| H | -3.070607223 | 3.815424275 | -0.174919010 |
| H | -1.784373126 | 4.578845331 | 0.179987015  |

point 3

|   |              |              |              |
|---|--------------|--------------|--------------|
| C | -0.156856011 | -0.815610056 | -0.156986014 |
| C | -1.115922082 | 0.267320020  | -0.162457013 |
| C | 0.728803053  | 1.828130132  | 0.147047012  |
| C | 1.158929085  | -0.502335035 | -0.021612001 |
| H | -1.211391087 | 2.319212164  | -0.030454003 |
| N | 1.585427114  | 0.798869058  | 0.111404008  |
| H | 1.941786138  | -1.233369088 | -0.019368004 |
| N | -0.577982039 | 1.527518110  | 0.007897002  |
| H | 2.575882186  | 0.989049069  | 0.103879007  |
| S | -2.759255200 | 0.064283002  | -0.354064025 |
| S | 1.256090092  | 3.448882250  | 0.372402028  |
| C | -0.612247044 | -2.240813163 | -0.293559020 |
| H | -1.241062087 | -2.526343184 | 0.541311040  |
| H | -1.198115088 | -2.372674169 | -1.193022086 |
| H | 0.239392019  | -2.911072210 | -0.329313024 |
| O | -4.825920348 | 2.931474210  | -0.104890006 |
| H | -5.238900375 | 2.883161206  | -0.956348069 |
| H | -4.406850316 | 2.083899149  | 0.015787003  |
| O | 4.426679318  | 1.138193084  | -0.229510015 |
| H | 4.694027337  | 1.830289132  | 0.374946026  |
| H | 4.685487337  | 1.423732100  | -1.084942078 |
| O | 4.536395325  | 3.363733244  | 1.488615105  |

|   |              |             |              |
|---|--------------|-------------|--------------|
| H | 3.620637262  | 3.570992255 | 1.382924099  |
| H | 4.998194361  | 4.164817300 | 1.446191102  |
| O | -2.119982153 | 3.848250278 | -0.293253024 |
| H | -3.063213220 | 3.799846276 | -0.189837015 |
| H | -1.807745128 | 4.586689331 | 0.193974016  |

point 4

|   |              |              |              |
|---|--------------|--------------|--------------|
| C | -0.163784010 | -0.819915061 | -0.156979013 |
| C | -1.122383082 | 0.256481020  | -0.164685014 |
| C | 0.721704050  | 1.816694130  | 0.143070012  |
| C | 1.156894086  | -0.512003034 | -0.018917002 |
| H | -1.213587088 | 2.316818166  | -0.030681004 |
| N | 1.582641112  | 0.793303055  | 0.112106010  |
| H | 1.939179141  | -1.243053090 | -0.013552002 |
| N | -0.580973044 | 1.524777109  | 0.006344999  |
| H | 2.572322183  | 0.986573070  | 0.103818009  |
| S | -2.772383198 | 0.064924005  | -0.358095028 |
| S | 1.258135092  | 3.443322248  | 0.368103029  |
| C | -0.618871046 | -2.245219162 | -0.293338020 |
| H | -1.247593087 | -2.529515183 | 0.541966040  |
| H | -1.206172087 | -2.375510173 | -1.192033085 |
| H | 0.232088018  | -2.916607208 | -0.329969024 |
| O | -4.807880346 | 2.922710210  | -0.108835006 |
| H | -5.224850375 | 2.865742204  | -0.957522070 |
| H | -4.388275316 | 2.075349148  | 0.017180999  |
| O | 4.421019317  | 1.150789084  | -0.222765016 |
| H | 4.695040336  | 1.845433132  | 0.374919028  |
| H | 4.702731340  | 1.411098099  | -1.076412079 |
| O | 4.554093330  | 3.385099241  | 1.484923109  |
| H | 3.647455262  | 3.621488259  | 1.385886100  |



|   |              |             |              |
|---|--------------|-------------|--------------|
| H | 5.036790364  | 4.167726299 | 1.488286110  |
| O | -2.113472151 | 3.855875277 | -0.292380019 |
| H | -3.055819222 | 3.784268271 | -0.204756013 |
| H | -1.831117131 | 4.594533330 | 0.207961013  |

point 5

|   |              |              |              |
|---|--------------|--------------|--------------|
| C | -0.170713014 | -0.824220061 | -0.156972012 |
| C | -1.128844083 | 0.245641015  | -0.166914014 |
| C | 0.714606053  | 1.805259128  | 0.139093012  |
| C | 1.154858082  | -0.521670039 | -0.016223003 |
| H | -1.215782089 | 2.314424169  | -0.030908005 |
| N | 1.579854115  | 0.787738058  | 0.112809006  |
| H | 1.936571139  | -1.252738092 | -0.007736000 |
| N | -0.583963044 | 1.522036109  | 0.004793002  |
| H | 2.568763185  | 0.984097071  | 0.103758006  |
| S | -2.785510202 | 0.065565003  | -0.362127025 |
| S | 1.260180092  | 3.437763247  | 0.363804025  |
| C | -0.625494044 | -2.249625160 | -0.293118020 |
| H | -1.254124092 | -2.532686183 | 0.542621039  |
| H | -1.214229086 | -2.378347172 | -1.191043084 |
| H | 0.224783018  | -2.922142212 | -0.330626024 |
| O | -4.789840344 | 2.913947209  | -0.112780007 |
| H | -5.210799375 | 2.848322203  | -0.958696071 |
| H | -4.369700316 | 2.066798146  | 0.018575000  |
| O | 4.415358317  | 1.163385085  | -0.216020017 |
| H | 4.696052340  | 1.860578132  | 0.374891029  |
| H | 4.719974342  | 1.398464103  | -1.067883075 |
| O | 4.571790330  | 3.406465244  | 1.481230108  |
| H | 3.674273266  | 3.671983262  | 1.388848101  |
| H | 5.075386367  | 4.170634302  | 1.530381112  |

|   |              |             |              |
|---|--------------|-------------|--------------|
| O | -2.106963149 | 3.863499277 | -0.291506019 |
| H | -3.048425219 | 3.768691272 | -0.219675018 |
| H | -1.854489133 | 4.602376330 | 0.221948014  |

point 6

|   |              |              |              |
|---|--------------|--------------|--------------|
| C | -0.177641014 | -0.828525061 | -0.156966011 |
| C | -1.135305083 | 0.234801015  | -0.169142014 |
| C | 0.707507050  | 1.793824131  | 0.135117007  |
| C | 1.152822083  | -0.531338038 | -0.013528998 |
| H | -1.217978090 | 2.312030165  | -0.031134001 |
| N | 1.577068114  | 0.782172055  | 0.113511007  |
| H | 1.933964137  | -1.262422089 | -0.001918998 |
| N | -0.586954043 | 1.519295108  | 0.003240999  |
| H | 2.565203183  | 0.981622072  | 0.103697007  |
| S | -2.798637200 | 0.066207006  | -0.366159027 |
| S | 1.262225092  | 3.432203245  | 0.359504026  |
| C | -0.632118046 | -2.254031164 | -0.292897020 |
| H | -1.260655092 | -2.535857182 | 0.543277039  |
| H | -1.222286090 | -2.381184170 | -1.190054084 |
| H | 0.217479017  | -2.927678210 | -0.331282024 |
| O | -4.771799343 | 2.905183208  | -0.116725007 |
| H | -5.196748375 | 2.830902206  | -0.959870072 |
| H | -4.351124311 | 2.058247150  | 0.019968001  |
| O | 4.409697316  | 1.175981086  | -0.209275013 |
| H | 4.697065338  | 1.875722137  | 0.374864025  |
| H | 4.737217340  | 1.385830102  | -1.059354077 |
| O | 4.589487329  | 3.427831246  | 1.477538107  |
| H | 3.701091265  | 3.722479266  | 1.391809101  |
| H | 5.113983370  | 4.173542301  | 1.572476115  |
| O | -2.100453152 | 3.871123276  | -0.290633019 |

|   |              |             |              |
|---|--------------|-------------|--------------|
| H | -3.041031221 | 3.753113268 | -0.234594017 |
| H | -1.877861135 | 4.610220330 | 0.235935015  |

point 7

|   |              |              |              |
|---|--------------|--------------|--------------|
| C | -0.184569013 | -0.832830061 | -0.156959010 |
| C | -1.141766083 | 0.223961015  | -0.171371015 |
| C | 0.700409053  | 1.782388129  | 0.131140007  |
| C | 1.150787084  | -0.541005038 | -0.010834999 |
| H | -1.220173085 | 2.309636168  | -0.031361002 |
| N | 1.574281112  | 0.776606058  | 0.114213008  |
| H | 1.931357140  | -1.272106091 | 0.003896999  |
| N | -0.589945043 | 1.516554107  | 0.001690002  |
| H | 2.561644185  | 0.979146073  | 0.103636009  |
| S | -2.811764204 | 0.066848004  | -0.370191025 |
| S | 1.264270092  | 3.426644248  | 0.355205027  |
| C | -0.638741044 | -2.258437163 | -0.292677019 |
| H | -1.267186092 | -2.539029181 | 0.543932039  |
| H | -1.230343089 | -2.384020174 | -1.189065083 |
| H | 0.210175016  | -2.933213214 | -0.331938024 |
| O | -4.753758341 | 2.896419207  | -0.120670008 |
| H | -5.182698375 | 2.813482204  | -0.961044067 |
| H | -4.332549311 | 2.049697148  | 0.021362002  |
| O | 4.404036315  | 1.188577087  | -0.202530014 |
| H | 4.698078337  | 1.890866137  | 0.374837026  |
| H | 4.754460342  | 1.373196101  | -1.050825073 |
| O | 4.607184334  | 3.449197248  | 1.473845106  |
| H | 3.727909270  | 3.772975269  | 1.394771102  |
| H | 5.152579373  | 4.176450299  | 1.614572117  |
| O | -2.093944151 | 3.878748281  | -0.289760020 |
| H | -3.033637218 | 3.737536269  | -0.249512015 |

|   |              |             |             |
|---|--------------|-------------|-------------|
| H | -1.901233137 | 4.618064335 | 0.249922017 |
|---|--------------|-------------|-------------|

point 8

|   |              |              |              |
|---|--------------|--------------|--------------|
| C | -0.191497012 | -0.837135061 | -0.156952009 |
| C | -1.148227083 | 0.213121015  | -0.173599015 |
| C | 0.693310050  | 1.770953128  | 0.127163007  |
| C | 1.148751085  | -0.550673037 | -0.008141000 |
| H | -1.222369086 | 2.307242164  | -0.031588003 |
| N | 1.571495115  | 0.771041055  | 0.114915010  |
| H | 1.928749137  | -1.281791093 | 0.009713001  |
| N | -0.592936043 | 1.513813107  | 0.000137999  |
| H | 2.558084182  | 0.976670068  | 0.103576006  |
| S | -2.824892203 | 0.067489007  | -0.374222027 |
| S | 1.266315092  | 3.421084247  | 0.350906028  |
| C | -0.645365046 | -2.262843161 | -0.292456019 |
| H | -1.273717092 | -2.542200181 | 0.544587039  |
| H | -1.238400088 | -2.386857173 | -1.188075088 |
| H | 0.202871015  | -2.938748212 | -0.332595024 |
| O | -4.735718339 | 2.887656207  | -0.124615008 |
| H | -5.168647370 | 2.796063203  | -0.962218068 |
| H | -4.313973311 | 2.041146147  | 0.022755003  |
| O | 4.398375315  | 1.201173087  | -0.195785014 |
| H | 4.699091336  | 1.906010137  | 0.374810028  |
| H | 4.771703345  | 1.360562100  | -1.042295074 |
| O | 4.624881333  | 3.470563251  | 1.470153105  |
| H | 3.754726269  | 3.823470278  | 1.397733103  |
| H | 5.191175371  | 4.179358303  | 1.656667119  |
| O | -2.087434149 | 3.886372281  | -0.288886020 |
| H | -3.026243220 | 3.721958269  | -0.264431020 |
| H | -1.924606140 | 4.625908334  | 0.263909018  |

point 9

|   |              |              |              |
|---|--------------|--------------|--------------|
| C | -0.198425016 | -0.841439060 | -0.156945013 |
| C | -1.154689084 | 0.202282015  | -0.175827015 |
| C | 0.686211047  | 1.759517126  | 0.123187008  |
| C | 1.146715081  | -0.560340042 | -0.005446001 |
| H | -1.224564087 | 2.304848167  | -0.031815004 |
| N | 1.568708113  | 0.765475058  | 0.115617011  |
| H | 1.926142140  | -1.291475095 | 0.015529003  |
| N | -0.595927043 | 1.511072106  | -0.001413999 |
| H | 2.554524185  | 0.974194069  | 0.103515008  |
| S | -2.838019206 | 0.068130004  | -0.378254030 |
| S | 1.268360093  | 3.415525245  | 0.346607023  |
| C | -0.651988049 | -2.267249165 | -0.292235019 |
| H | -1.280248091 | -2.545371186 | 0.545242038  |
| H | -1.246457092 | -2.389693171 | -1.187086087 |
| H | 0.195567015  | -2.944284210 | -0.333251024 |
| O | -4.717677337 | 2.878892206  | -0.128560009 |
| H | -5.154597370 | 2.778643201  | -0.963392069 |
| H | -4.295398311 | 2.032595145  | 0.024149004  |
| O | 4.392714314  | 1.213769088  | -0.189040015 |
| H | 4.700103340  | 1.921155137  | 0.374783029  |
| H | 4.788946347  | 1.347928099  | -1.033766076 |
| O | 4.642578333  | 3.491929253  | 1.466460104  |
| H | 3.781544273  | 3.873966281  | 1.400695099  |
| H | 5.229772374  | 4.182266301  | 1.698762122  |
| O | -2.080925152 | 3.893997280  | -0.288013021 |
| H | -3.018849216 | 3.706381265  | -0.279350019 |
| H | -1.947978142 | 4.633751334  | 0.277896019  |

point 10

|   |              |              |              |
|---|--------------|--------------|--------------|
| C | -0.205353015 | -0.845744060 | -0.156938012 |
| C | -1.161150084 | 0.191442014  | -0.178056010 |
| C | 0.679113050  | 1.748082124  | 0.119210008  |
| C | 1.144680082  | -0.570008042 | -0.002752002 |
| H | -1.226760088 | 2.302453163  | -0.032042000 |
| N | 1.565922111  | 0.759910055  | 0.116319007  |
| H | 1.923535138  | -1.301159091 | 0.021344999  |
| N | -0.598917042 | 1.508331111  | -0.002966001 |
| H | 2.550965182  | 0.971719070  | 0.103455009  |
| S | -2.851146205 | 0.068772008  | -0.382286027 |
| S | 1.270405093  | 3.409965243  | 0.342308025  |
| C | -0.658612046 | -2.271655164 | -0.292015019 |
| H | -1.286779091 | -2.548543185 | 0.545898038  |
| H | -1.254515091 | -2.392530170 | -1.186097087 |
| H | 0.188262014  | -2.949819214 | -0.333908024 |
| O | -4.699637336 | 2.870129205  | -0.132505009 |
| H | -5.140546370 | 2.761223199  | -0.964566070 |
| H | -4.276822306 | 2.024045144  | 0.025543000  |
| O | 4.387054314  | 1.226366089  | -0.182294011 |
| H | 4.701116338  | 1.936299142  | 0.374756025  |
| H | 4.806189344  | 1.335293098  | -1.025237072 |
| O | 4.660275338  | 3.513295250  | 1.462768103  |
| H | 3.808362272  | 3.924462284  | 1.403657100  |
| H | 5.268368377  | 4.185175299  | 1.740857124  |
| O | -2.074415150 | 3.901621280  | -0.287139021 |
| H | -3.011455219 | 3.690803266  | -0.294268023 |
| H | -1.971350144 | 4.641595333  | 0.291883021  |

${}^1\Pi_7\Pi_8^*$  to  ${}^1\Pi_8\Pi_8^*$

point 1

|   |              |              |              |
|---|--------------|--------------|--------------|
| C | -0.205353015 | -0.845745060 | -0.156938012 |
| C | -1.161150084 | 0.191442014  | -0.178056010 |
| C | 0.679113050  | 1.748082124  | 0.119210008  |
| C | 1.144680082  | -0.570008042 | -0.002752002 |
| H | -1.226760088 | 2.302454163  | -0.032042000 |
| N | 1.565922111  | 0.759910055  | 0.116319007  |
| H | 1.923535138  | -1.301160091 | 0.021344999  |
| N | -0.598918043 | 1.508331111  | -0.002966001 |
| H | 2.550966182  | 0.971719070  | 0.103455009  |
| S | -2.851147205 | 0.068772008  | -0.382286027 |
| S | 1.270406093  | 3.409966243  | 0.342308025  |
| C | -0.658612046 | -2.271656164 | -0.292015019 |
| H | -1.286779091 | -2.548543185 | 0.545898038  |
| H | -1.254515091 | -2.392531170 | -1.186097087 |
| H | 0.188263014  | -2.949820214 | -0.333908024 |
| O | -4.699638336 | 2.870129205  | -0.132505009 |
| H | -5.140547370 | 2.761224199  | -0.964567070 |
| H | -4.276824306 | 2.024045144  | 0.025543000  |
| O | 4.387055314  | 1.226366089  | -0.182295011 |
| H | 4.701117339  | 1.936299142  | 0.374756025  |
| H | 4.806190344  | 1.335294098  | -1.025237072 |
| O | 4.660276333  | 3.513297251  | 1.462768103  |
| H | 3.808364273  | 3.924463285  | 1.403657100  |
| H | 5.268369377  | 4.185176300  | 1.740858124  |
| O | -2.074416150 | 3.901622280  | -0.287139021 |
| H | -3.011456219 | 3.690804266  | -0.294268023 |
| H | -1.971351144 | 4.641597334  | 0.291883021  |

point 2

|   |              |              |              |
|---|--------------|--------------|--------------|
| C | -0.194675012 | -0.847123059 | -0.156690013 |
| C | -1.140792085 | 0.195072012  | -0.176464012 |
| C | 0.696381051  | 1.752581126  | 0.123113008  |
| C | 1.155808082  | -0.570957042 | -0.000409001 |
| H | -1.212934089 | 2.301753168  | -0.026895000 |
| N | 1.577288114  | 0.758512053  | 0.118657007  |
| H | 1.933877140  | -1.303006094 | 0.021791001  |
| N | -0.585210045 | 1.508957107  | 0.001064001  |
| H | 2.562666185  | 0.967309071  | 0.105892008  |
| S | -2.835570206 | 0.075311003  | -0.384452029 |
| S | 1.280583092  | 3.411127248  | 0.340426027  |
| C | -0.652396044 | -2.271694164 | -0.293650023 |
| H | -1.278446095 | -2.551464185 | 0.545270037  |
| H | -1.248754091 | -2.392118173 | -1.188059086 |
| H | 0.192693016  | -2.951312213 | -0.338775026 |
| O | -4.760915341 | 2.879824209  | -0.106321007 |
| H | -5.213385374 | 2.789815202  | -0.932155069 |
| H | -4.343331313 | 2.030959146  | 0.039167001  |
| O | 4.405531315  | 1.215045088  | -0.191767014 |
| H | 4.708385339  | 1.921756139  | 0.374390025  |
| H | 4.821329349  | 1.338302095  | -1.033603074 |
| O | 4.646127334  | 3.491871250  | 1.468513105  |
| H | 3.783986273  | 3.865494280  | 1.402189098  |
| H | 5.224905378  | 4.185863299  | 1.733372124  |
| O | -2.112697150 | 3.862835276  | -0.275429022 |
| H | -3.050066219 | 3.676361267  | -0.263881019 |
| H | -1.976062145 | 4.598021328  | 0.295148023  |

point 3

|   |              |              |              |
|---|--------------|--------------|--------------|
| C | -0.183997014 | -0.848500063 | -0.156442009 |
|---|--------------|--------------|--------------|



|   |              |              |              |
|---|--------------|--------------|--------------|
| C | -1.120434080 | 0.198702014  | -0.174872014 |
| C | 0.713649052  | 1.757080127  | 0.127017007  |
| C | 1.166935087  | -0.571906042 | 0.001934000  |
| H | -1.199107084 | 2.301053167  | -0.021746999 |
| N | 1.588654116  | 0.757113057  | 0.120995007  |
| H | 1.944218142  | -1.304853092 | 0.022236002  |
| N | -0.571503041 | 1.509583107  | 0.005093003  |
| H | 2.574367183  | 0.962900072  | 0.108330007  |
| S | -2.819992201 | 0.081851004  | -0.386618025 |
| S | 1.290761092  | 3.412288247  | 0.338544024  |
| C | -0.646179048 | -2.271732164 | -0.295285022 |
| H | -1.270113093 | -2.554384185 | 0.544642041  |
| H | -1.242994087 | -2.391705172 | -1.190021084 |
| H | 0.197123013  | -2.952803213 | -0.343642022 |
| O | -4.822192347 | 2.889518207  | -0.080136004 |
| H | -5.286223379 | 2.818406204  | -0.899743063 |
| H | -4.409838315 | 2.037872148  | 0.052792003  |
| O | 4.424008317  | 1.203723087  | -0.201239017 |
| H | 4.715652340  | 1.907212136  | 0.374025025  |
| H | 4.836468348  | 1.341309097  | -1.041970075 |
| O | 4.631979331  | 3.470446250  | 1.474257108  |
| H | 3.759608273  | 3.806526276  | 1.400720102  |
| H | 5.181441373  | 4.186551303  | 1.725886123  |
| O | -2.150977155 | 3.824048277  | -0.263719017 |
| H | -3.088676224 | 3.661918263  | -0.233493016 |
| H | -1.980773140 | 4.554445328  | 0.298413020  |

point 4

|   |              |              |              |
|---|--------------|--------------|--------------|
| C | -0.173319011 | -0.849878062 | -0.156194010 |
| C | -1.100076081 | 0.202332017  | -0.173280011 |

|   |              |              |              |
|---|--------------|--------------|--------------|
| C | 0.730917053  | 1.761579128  | 0.130920007  |
| C | 1.178063086  | -0.572855042 | 0.004278001  |
| H | -1.185280085 | 2.300352165  | -0.016599999 |
| N | 1.600021113  | 0.755715055  | 0.123333008  |
| H | 1.954560139  | -1.306699095 | 0.022682003  |
| N | -0.557796038 | 1.510208108  | 0.009122000  |
| H | 2.586068186  | 0.958490067  | 0.110767006  |
| S | -2.804415202 | 0.088390005  | -0.388785027 |
| S | 1.300938096  | 3.413449246  | 0.336662026  |
| C | -0.639963046 | -2.271771165 | -0.296921021 |
| H | -1.261780091 | -2.557304185 | 0.544014040  |
| H | -1.237234088 | -2.391292170 | -1.191982088 |
| H | 0.201553015  | -2.954295212 | -0.348509024 |
| O | -4.883469353 | 2.899212210  | -0.053951002 |
| H | -5.359060388 | 2.846997206  | -0.867331063 |
| H | -4.476345323 | 2.044785145  | 0.066416005  |
| O | 4.442484318  | 1.192402086  | -0.210712015 |
| H | 4.722920341  | 1.892668134  | 0.373659025  |
| H | 4.851607347  | 1.344317094  | -1.050336076 |
| O | 4.617830332  | 3.449020249  | 1.480002104  |
| H | 3.735230268  | 3.747558272  | 1.399251101  |
| H | 5.137976367  | 4.187239302  | 1.718400122  |
| O | -2.189258160 | 3.785261272  | -0.252009018 |
| H | -3.127286223 | 3.647475264  | -0.203105012 |
| H | -1.985484140 | 4.510870323  | 0.301678023  |

point 5

|   |              |              |              |
|---|--------------|--------------|--------------|
| C | -0.162641013 | -0.851256060 | -0.155947011 |
| C | -1.079719077 | 0.205962014  | -0.171688013 |
| C | 0.748185054  | 1.766078125  | 0.134824012  |

|   |              |              |              |
|---|--------------|--------------|--------------|
| C | 1.189190086  | -0.573804042 | 0.006621002  |
| H | -1.171454086 | 2.299651164  | -0.011452999 |
| N | 1.611387116  | 0.754317054  | 0.125670008  |
| H | 1.964901140  | -1.308546093 | 0.023128004  |
| N | -0.544089041 | 1.510834109  | 0.013151002  |
| H | 2.597769184  | 0.954081068  | 0.113205010  |
| S | -2.788838203 | 0.094930006  | -0.390951029 |
| S | 1.311116096  | 3.414610245  | 0.334780023  |
| C | -0.633746044 | -2.271809165 | -0.298556020 |
| H | -1.253447089 | -2.560224186 | 0.543386039  |
| H | -1.231473089 | -2.390879174 | -1.193944087 |
| H | 0.205983017  | -2.955787211 | -0.353376026 |
| O | -4.944745358 | 2.908906208  | -0.027766004 |
| H | -5.431898393 | 2.875588208  | -0.834919062 |
| H | -4.542853325 | 2.051699148  | 0.080041006  |
| O | 4.460960320  | 1.181080084  | -0.220184017 |
| H | 4.730187341  | 1.878124136  | 0.373293025  |
| H | 4.866745351  | 1.347325097  | -1.058702077 |
| O | 4.603681329  | 3.427595249  | 1.485746107  |
| H | 3.710852268  | 3.688589268  | 1.397783100  |
| H | 5.094512367  | 4.187926301  | 1.710915122  |
| O | -2.227539159 | 3.746475268  | -0.240299018 |
| H | -3.165896228 | 3.633032260  | -0.172717014 |
| H | -1.990196141 | 4.467294323  | 0.304943020  |

point 6

|   |              |              |              |
|---|--------------|--------------|--------------|
| C | -0.151963010 | -0.852634059 | -0.155699012 |
| C | -1.059361078 | 0.209592016  | -0.170096010 |
| C | 0.765453054  | 1.770577126  | 0.138727012  |
| C | 1.200318085  | -0.574753042 | 0.008963998  |

|   |              |              |              |
|---|--------------|--------------|--------------|
| H | -1.157627081 | 2.298951163  | -0.006305999 |
| N | 1.622753118  | 0.752918052  | 0.128008008  |
| H | 1.975243142  | -1.310392097 | 0.023573000  |
| N | -0.530382037 | 1.511459110  | 0.017180999  |
| H | 2.609469187  | 0.949671069  | 0.115642009  |
| S | -2.773260198 | 0.101469007  | -0.393118026 |
| S | 1.321293095  | 3.415771244  | 0.332898025  |
| C | -0.627530043 | -2.271847165 | -0.300192019 |
| H | -1.245114088 | -2.563144186 | 0.542758038  |
| H | -1.225713090 | -2.390467172 | -1.195906086 |
| H | 0.210413014  | -2.957279211 | -0.358243028 |
| O | -5.006022358 | 2.918600212  | -0.001582002 |
| H | -5.504736397 | 2.904180211  | -0.802507056 |
| H | -4.609360332 | 2.058612150  | 0.093665008  |
| O | 4.479437321  | 1.169759083  | -0.229657015 |
| H | 4.737455342  | 1.863581134  | 0.372928025  |
| H | 4.881884350  | 1.350333099  | -1.067068079 |
| O | 4.589532330  | 3.406169243  | 1.491491109  |
| H | 3.686474268  | 3.629621263  | 1.396314098  |
| H | 5.051048362  | 4.188614301  | 1.703429121  |
| O | -2.265820164 | 3.707688269  | -0.228589019 |
| H | -3.204506228 | 3.618589262  | -0.142330011 |
| H | -1.994907141 | 4.423719317  | 0.308208022  |

point 7

|   |              |              |              |
|---|--------------|--------------|--------------|
| C | -0.141285013 | -0.854012063 | -0.155451013 |
| C | -1.039003073 | 0.213222013  | -0.168504012 |
| C | 0.782721055  | 1.775076128  | 0.142630012  |
| C | 1.211445085  | -0.575702042 | 0.011306999  |
| H | -1.143801082 | 2.298250168  | -0.001157999 |

|   |              |              |              |
|---|--------------|--------------|--------------|
| N | 1.634119115  | 0.751520056  | 0.130346009  |
| H | 1.985584144  | -1.312239094 | 0.024019001  |
| N | -0.516675040 | 1.512085110  | 0.021210001  |
| H | 2.621170191  | 0.945261070  | 0.118080008  |
| S | -2.757683199 | 0.108008008  | -0.395284028 |
| S | 1.331471094  | 3.416933248  | 0.331015022  |
| C | -0.621314046 | -2.271885165 | -0.301827023 |
| H | -1.236781091 | -2.566064186 | 0.542130037  |
| H | -1.219952090 | -2.390054170 | -1.197868084 |
| H | 0.214843016  | -2.958770215 | -0.363111025 |
| O | -5.067299364 | 2.928294210  | 0.024603001  |
| H | -5.577573401 | 2.932771213  | -0.770095055 |
| H | -4.675867334 | 2.065525147  | 0.107290010  |
| O | 4.497913323  | 1.158437082  | -0.239129018 |
| H | 4.744722343  | 1.849037131  | 0.372562024  |
| H | 4.897023355  | 1.353341096  | -1.075434080 |
| O | 4.575384327  | 3.384744243  | 1.497235106  |
| H | 3.662096263  | 3.570653259  | 1.394845102  |
| H | 5.007583362  | 4.189302300  | 1.695943121  |
| O | -2.304100164 | 3.668901265  | -0.216879014 |
| H | -3.243116233 | 3.604146258  | -0.111942007 |
| H | -1.999618142 | 4.380143317  | 0.311473025  |

point 8

|   |              |              |              |
|---|--------------|--------------|--------------|
| C | -0.130606009 | -0.855390062 | -0.155203009 |
| C | -1.018645074 | 0.216852016  | -0.166911014 |
| C | 0.799989056  | 1.779575129  | 0.146534012  |
| C | 1.222573089  | -0.576651042 | 0.013650000  |
| H | -1.129974082 | 2.297549167  | 0.003989002  |
| N | 1.645485117  | 0.750122054  | 0.132684009  |

|   |              |              |              |
|---|--------------|--------------|--------------|
| H | 1.995926141  | -1.314085092 | 0.024465002  |
| N | -0.502967036 | 1.512711111  | 0.025239003  |
| H | 2.632871189  | 0.940852066  | 0.120517007  |
| S | -2.742106195 | 0.114548009  | -0.397450030 |
| S | 1.341648099  | 3.418093247  | 0.329133024  |
| C | -0.615097044 | -2.271923166 | -0.303462022 |
| H | -1.228447089 | -2.568985186 | 0.541502041  |
| H | -1.214192086 | -2.389641174 | -1.199830088 |
| H | 0.219273018  | -2.960262215 | -0.367978027 |
| O | -5.128576370 | 2.937989213  | 0.050788003  |
| H | -5.650411406 | 2.961362215  | -0.737683055 |
| H | -4.742374341 | 2.072438149  | 0.120914006  |
| O | 4.516390324  | 1.147116081  | -0.248602016 |
| H | 4.751989344  | 1.834493133  | 0.372196024  |
| H | 4.912162354  | 1.356348098  | -1.083801076 |
| O | 4.561235328  | 3.363318242  | 1.502980108  |
| H | 3.637718263  | 3.511685255  | 1.393377101  |
| H | 4.964119357  | 4.189989299  | 1.688457120  |
| O | -2.342381169 | 3.630114261  | -0.205169015 |
| H | -3.281726238 | 3.589703259  | -0.081554004 |
| H | -2.004329142 | 4.336568312  | 0.314738022  |

point 9

|   |              |              |              |
|---|--------------|--------------|--------------|
| C | -0.119928006 | -0.856768060 | -0.154955010 |
| C | -0.998287070 | 0.220481018  | -0.165319010 |
| C | 0.817257057  | 1.784074131  | 0.150438011  |
| C | 1.233700089  | -0.577600042 | 0.015994001  |
| H | -1.116147078 | 2.296848165  | 0.009136002  |
| N | 1.656851120  | 0.748724052  | 0.135022009  |
| H | 2.006267143  | -1.315931095 | 0.024910003  |

|   |              |              |              |
|---|--------------|--------------|--------------|
| N | -0.489260033 | 1.513336107  | 0.029268000  |
| H | 2.644572192  | 0.936442067  | 0.122955011  |
| S | -2.726528196 | 0.121087010  | -0.399616026 |
| S | 1.351826098  | 3.419255246  | 0.327251021  |
| C | -0.608881043 | -2.271961166 | -0.305098021 |
| H | -1.220114087 | -2.571905186 | 0.540874040  |
| H | -1.208432087 | -2.389228172 | -1.201791087 |
| H | 0.223703014  | -2.961754214 | -0.372845028 |
| O | -5.189852375 | 2.947683211  | 0.076973006  |
| H | -5.723249410 | 2.989953218  | -0.705271049 |
| H | -4.808881348 | 2.079352151  | 0.134539008  |
| O | 4.534866325  | 1.135795080  | -0.258074019 |
| H | 4.759257344  | 1.819949131  | 0.371831024  |
| H | 4.927301353  | 1.359356100  | -1.092167077 |
| O | 4.547086325  | 3.341893242  | 1.508724110  |
| H | 3.613341258  | 3.452716251  | 1.391908100  |
| H | 4.920655352  | 4.190677303  | 1.680972119  |
| O | -2.380662174 | 3.591327256  | -0.193459016 |
| H | -3.320336238 | 3.575260255  | -0.051166005 |
| H | -2.009041143 | 4.292992306  | 0.318004025  |

point 10

|   |              |              |              |
|---|--------------|--------------|--------------|
| C | -0.109250008 | -0.858146059 | -0.154708012 |
| C | -0.977929071 | 0.224111015  | -0.163727012 |
| C | 0.834525058  | 1.788573127  | 0.154341011  |
| C | 1.244828088  | -0.578549042 | 0.018337002  |
| H | -1.102321079 | 2.296148164  | 0.014283002  |
| N | 1.668217122  | 0.747325056  | 0.137360010  |
| H | 2.016609145  | -1.317778093 | 0.025356004  |
| N | -0.475553035 | 1.513962107  | 0.033298002  |

|   |              |              |              |
|---|--------------|--------------|--------------|
| H | 2.656273190  | 0.932033068  | 0.125392010  |
| S | -2.710951197 | 0.127627011  | -0.401783028 |
| S | 1.362003098  | 3.420416245  | 0.325369024  |
| C | -0.602665041 | -2.272000166 | -0.306733020 |
| H | -1.211781086 | -2.574825186 | 0.540246039  |
| H | -1.202671088 | -2.388815171 | -1.203753086 |
| H | 0.228133016  | -2.963245213 | -0.377712025 |
| O | -5.251129375 | 2.957377214  | 0.103157009  |
| H | -5.796087415 | 3.018544215  | -0.672860048 |
| H | -4.875388350 | 2.086265148  | 0.148163010  |
| O | 4.553343327  | 1.124473079  | -0.267547022 |
| H | 4.766524345  | 1.805406128  | 0.371465024  |
| H | 4.942439357  | 1.362364097  | -1.100533079 |
| O | 4.532937326  | 3.320467241  | 1.514469107  |
| H | 3.588963258  | 3.393748246  | 1.390439099  |
| H | 4.877191352  | 4.191364302  | 1.673486119  |
| O | -2.418943174 | 3.552540257  | -0.181749011 |
| H | -3.358946243 | 3.560817256  | -0.020779002 |
| H | -2.013752143 | 4.249416306  | 0.321269022  |

## Snapshot2

FC point to  ${}^1\pi_7\pi_8^*$

point01

|   |           |           |           |
|---|-----------|-----------|-----------|
| C | -1.577921 | -1.105490 | 0.321253  |
| C | -2.301686 | 1.534458  | 0.368497  |
| C | 2.158067  | 2.683411  | 0.045353  |
| C | 0.925966  | -1.628944 | 0.020787  |
| N | -0.362827 | 3.231434  | 0.188973  |
| N | 2.706088  | 0.211649  | -0.141729 |
| H | 1.640282  | -3.522450 | -0.047243 |



|   |           |           |           |
|---|-----------|-----------|-----------|
| H | -0.786126 | 5.098483  | 0.187083  |
| H | 4.542903  | -0.304246 | -0.300466 |
| S | -5.276117 | 2.494438  | 0.638727  |
| S | 4.384167  | 4.988879  | 0.139840  |
| C | -3.492214 | -3.178521 | 0.667073  |
| H | -4.408733 | -3.014113 | 2.490659  |
| H | -4.952974 | -3.087812 | -0.752111 |
| H | -2.587035 | -5.013445 | 0.557469  |
| O | -5.776895 | 8.970532  | 2.124052  |
| H | -5.816579 | 7.179071  | 1.961536  |
| H | -7.145056 | 9.575244  | 1.139505  |
| O | 10.440741 | 2.490659  | 0.391173  |
| H | 8.932737  | 3.426075  | 0.710537  |
| H | 11.202300 | 3.291905  | -1.016673 |
| O | -1.041239 | 8.585028  | 0.041574  |
| H | 0.417629  | 9.274778  | 0.820141  |
| H | -2.498218 | 9.257770  | 0.863605  |
| O | 7.687408  | -1.806578 | -0.534792 |
| H | 8.331804  | -2.528454 | -2.040904 |
| H | 8.894943  | -0.542351 | -0.052912 |

point02

|   |           |           |           |
|---|-----------|-----------|-----------|
| C | -1.619047 | -1.109838 | 0.336415  |
| C | -2.339371 | 1.521256  | 0.377739  |
| C | 2.119077  | 2.656987  | 0.044752  |
| C | 0.885297  | -1.653541 | 0.032411  |
| N | -0.384427 | 3.222741  | 0.194640  |
| N | 2.674357  | 0.191133  | -0.132844 |
| H | 1.596977  | -3.547222 | -0.017531 |
| H | -0.800890 | 5.091034  | 0.196292  |
| H | 4.510359  | -0.323415 | -0.292399 |

|         |           |           |           |
|---------|-----------|-----------|-----------|
| S       | -5.315335 | 2.516577  | 0.636798  |
| S       | 4.371728  | 4.960055  | 0.126211  |
| C       | -3.538284 | -3.177081 | 0.687915  |
| H       | -4.455458 | -3.002828 | 2.510229  |
| H       | -4.998405 | -3.085416 | -0.732123 |
| H       | -2.639520 | -5.015324 | 0.584222  |
| O       | -5.775906 | 8.959295  | 2.107553  |
| H       | -5.814661 | 7.165734  | 1.968996  |
| H       | -7.150382 | 9.547546  | 1.122987  |
| O       | 10.494216 | 2.461746  | 0.377000  |
| H       | 9.038785  | 3.429866  | 0.786088  |
| H       | 11.208688 | 3.281602  | -1.051374 |
| O       | -1.026996 | 8.592486  | 0.063754  |
| H       | 0.381007  | 9.301619  | 0.889980  |
| H       | -2.513186 | 9.236804  | 0.838521  |
| O       | 7.665844  | -1.791576 | -0.529411 |
| H       | 8.307569  | -2.538426 | -2.022277 |
| H       | 8.883814  | -0.535677 | -0.056985 |
| point03 |           |           |           |
| C       | -1.660174 | -1.114188 | 0.351578  |
| C       | -2.377054 | 1.508054  | 0.386982  |
| C       | 2.080086  | 2.630561  | 0.044150  |
| C       | 0.844630  | -1.678135 | 0.044033  |
| N       | -0.406027 | 3.214048  | 0.200309  |
| N       | 2.642627  | 0.170616  | -0.123960 |
| H       | 1.553672  | -3.571991 | 0.012181  |
| H       | -0.815655 | 5.083582  | 0.205502  |
| H       | 4.477814  | -0.342583 | -0.284332 |
| S       | -5.354552 | 2.538715  | 0.634871  |
| S       | 4.359292  | 4.931233  | 0.112582  |

|   |           |           |           |
|---|-----------|-----------|-----------|
| C | -3.584353 | -3.175643 | 0.708755  |
| H | -4.502186 | -2.991542 | 2.529799  |
| H | -5.043836 | -3.083018 | -0.712136 |
| H | -2.692006 | -5.017204 | 0.610973  |
| O | -5.774916 | 8.948059  | 2.091052  |
| H | -5.812743 | 7.152398  | 1.976457  |
| H | -7.155705 | 9.519849  | 1.106469  |
| O | 10.547506 | 2.432833  | 0.362827  |
| H | 9.145163  | 3.435282  | 0.864244  |
| H | 11.211834 | 3.268251  | -1.080651 |
| O | -1.012753 | 8.599945  | 0.085932  |
| H | 0.344384  | 9.328461  | 0.959820  |
| H | -2.528153 | 9.215835  | 0.813436  |
| O | 7.644279  | -1.776571 | -0.524030 |
| H | 8.283335  | -2.548396 | -2.003650 |
| H | 8.872686  | -0.529002 | -0.061055 |

point04

|   |           |           |           |
|---|-----------|-----------|-----------|
| C | -1.701300 | -1.118536 | 0.366739  |
| C | -2.414737 | 1.494853  | 0.396225  |
| C | 2.041097  | 2.604137  | 0.043549  |
| C | 0.803961  | -1.702732 | 0.055656  |
| N | -0.427628 | 3.205357  | 0.205976  |
| N | 2.610897  | 0.150099  | -0.115075 |
| H | 1.510367  | -3.596763 | 0.041893  |
| H | -0.830419 | 5.076133  | 0.214711  |
| H | 4.445269  | -0.361752 | -0.276265 |
| S | -5.393770 | 2.560851  | 0.632941  |
| S | 4.346854  | 4.902409  | 0.098954  |
| C | -3.630421 | -3.174203 | 0.729597  |
| H | -4.548913 | -2.980257 | 2.549369  |

|   |           |           |           |
|---|-----------|-----------|-----------|
| H | -5.089269 | -3.080620 | -0.692150 |
| H | -2.744491 | -5.019084 | 0.637726  |
| O | -5.773928 | 8.936823  | 2.074553  |
| H | -5.810825 | 7.139060  | 1.983918  |
| H | -7.161030 | 9.492151  | 1.089951  |
| O | 10.600986 | 2.403921  | 0.348654  |
| H | 9.258326  | 3.437306  | 0.942176  |
| H | 11.214156 | 3.254222  | -1.108702 |
| O | -0.998510 | 8.607402  | 0.108111  |
| H | 0.307761  | 9.355301  | 1.029659  |
| H | -2.543120 | 9.194869  | 0.788352  |
| O | 7.622715  | -1.761569 | -0.518649 |
| H | 8.259099  | -2.558366 | -1.985021 |
| H | 8.861559  | -0.522328 | -0.065128 |

point05

|   |           |           |           |
|---|-----------|-----------|-----------|
| C | -1.742426 | -1.122885 | 0.381900  |
| C | -2.452420 | 1.481651  | 0.405467  |
| C | 2.002106  | 2.577711  | 0.042948  |
| C | 0.763293  | -1.727329 | 0.067280  |
| N | -0.449228 | 3.196664  | 0.211644  |
| N | 2.579164  | 0.129582  | -0.106191 |
| H | 1.467062  | -3.621532 | 0.071604  |
| H | -0.845182 | 5.068684  | 0.223919  |
| H | 4.412724  | -0.380922 | -0.268197 |
| S | -5.432989 | 2.582989  | 0.631014  |
| S | 4.334418  | 4.873587  | 0.085325  |
| C | -3.676491 | -3.172765 | 0.750437  |
| H | -4.595640 | -2.968970 | 2.568939  |
| H | -5.134700 | -3.078222 | -0.672162 |
| H | -2.796976 | -5.020963 | 0.664479  |

|   |           |           |           |
|---|-----------|-----------|-----------|
| O | -5.772939 | 8.925587  | 2.058053  |
| H | -5.808907 | 7.125724  | 1.991378  |
| H | -7.166354 | 9.464453  | 1.073432  |
| O | 10.654276 | 2.375008  | 0.334482  |
| H | 9.377915  | 3.435628  | 1.019228  |
| H | 11.215748 | 3.239401  | -1.135368 |
| O | -0.984270 | 8.614861  | 0.130291  |
| H | 0.271138  | 9.382143  | 1.099499  |
| H | -2.558086 | 9.173900  | 0.763268  |
| O | 7.601149  | -1.746564 | -0.513267 |
| H | 8.234863  | -2.568338 | -1.966394 |
| H | 8.850430  | -0.515653 | -0.069200 |

point06

|   |           |           |           |
|---|-----------|-----------|-----------|
| C | -1.783552 | -1.127233 | 0.397062  |
| C | -2.490103 | 1.468449  | 0.414710  |
| C | 1.963116  | 2.551287  | 0.042347  |
| C | 0.722624  | -1.751924 | 0.078904  |
| N | -0.470827 | 3.187972  | 0.217313  |
| N | 2.547434  | 0.109066  | -0.097306 |
| H | 1.423757  | -3.646304 | 0.101316  |
| H | -0.859946 | 5.061235  | 0.233130  |
| H | 4.380181  | -0.400089 | -0.260130 |
| S | -5.472207 | 2.605127  | 0.629084  |
| S | 4.321979  | 4.844765  | 0.071696  |
| C | -3.722558 | -3.171325 | 0.771278  |
| H | -4.642365 | -2.957684 | 2.588509  |
| H | -5.180130 | -3.075826 | -0.652175 |
| H | -2.849461 | -5.022843 | 0.691230  |
| O | -5.771949 | 8.914350  | 2.041552  |
| H | -5.806989 | 7.112387  | 1.998839  |

|   |           |           |           |
|---|-----------|-----------|-----------|
| H | -7.171679 | 9.436756  | 1.056914  |
| O | 10.707755 | 2.346095  | 0.320309  |
| H | 9.503247  | 3.429483  | 1.093819  |
| H | 11.216963 | 3.223776  | -1.160658 |
| O | -0.970027 | 8.622320  | 0.152471  |
| H | 0.234513  | 9.408984  | 1.169338  |
| H | -2.573055 | 9.152932  | 0.738184  |
| O | 7.579586  | -1.731562 | -0.507885 |
| H | 8.210628  | -2.578308 | -1.947767 |
| H | 8.839302  | -0.508979 | -0.073270 |

point07

|   |           |           |           |
|---|-----------|-----------|-----------|
| C | -1.824678 | -1.131581 | 0.412225  |
| C | -2.527786 | 1.455248  | 0.423953  |
| C | 1.924125  | 2.524861  | 0.041744  |
| C | 0.681957  | -1.776520 | 0.090527  |
| N | -0.492427 | 3.179281  | 0.222980  |
| N | 2.515702  | 0.088549  | -0.088422 |
| H | 1.380452  | -3.671073 | 0.131028  |
| H | -0.874711 | 5.053785  | 0.242338  |
| H | 4.347636  | -0.419258 | -0.252063 |
| S | -5.511424 | 2.627264  | 0.627157  |
| S | 4.309543  | 4.815941  | 0.058068  |
| C | -3.768628 | -3.169887 | 0.792118  |
| H | -4.689093 | -2.946399 | 2.608079  |
| H | -5.225563 | -3.073428 | -0.632187 |
| H | -2.901947 | -5.024721 | 0.717983  |
| O | -5.770961 | 8.903114  | 2.025053  |
| H | -5.805070 | 7.099049  | 2.006298  |
| H | -7.177002 | 9.409058  | 1.040394  |
| O | 10.761234 | 2.317182  | 0.306136  |

|   |           |           |           |
|---|-----------|-----------|-----------|
| H | 9.633425  | 3.418736  | 1.164922  |
| H | 11.217622 | 3.207415  | -1.184528 |
| O | -0.955784 | 8.629776  | 0.174648  |
| H | 0.197890  | 9.435824  | 1.239177  |
| H | -2.588021 | 9.131965  | 0.713099  |
| O | 7.558020  | -1.716557 | -0.502503 |
| H | 8.186392  | -2.588278 | -1.929140 |
| H | 8.828173  | -0.502306 | -0.077343 |

point08

|   |           |           |           |
|---|-----------|-----------|-----------|
| C | -1.865804 | -1.135931 | 0.427386  |
| C | -2.565471 | 1.442046  | 0.433195  |
| C | 1.885134  | 2.498437  | 0.041143  |
| C | 0.641288  | -1.801117 | 0.102149  |
| N | -0.514026 | 3.170588  | 0.228647  |
| N | 2.483971  | 0.068030  | -0.079537 |
| H | 1.337148  | -3.695843 | 0.160740  |
| H | -0.889475 | 5.046334  | 0.251547  |
| H | 4.315091  | -0.438428 | -0.243996 |
| S | -5.550642 | 2.649402  | 0.625227  |
| S | 4.297105  | 4.787118  | 0.044439  |
| C | -3.814696 | -3.168449 | 0.812960  |
| H | -4.735820 | -2.935113 | 2.627649  |
| H | -5.270994 | -3.071030 | -0.612201 |
| H | -2.954432 | -5.026602 | 0.744735  |
| O | -5.769973 | 8.891878  | 2.008552  |
| H | -5.803152 | 7.085713  | 2.013758  |
| H | -7.182327 | 9.381362  | 1.023876  |
| O | 10.814525 | 2.288269  | 0.291963  |
| H | 9.767535  | 3.403514  | 1.231606  |
| H | 11.217957 | 3.190083  | -1.206991 |

|   |           |           |           |
|---|-----------|-----------|-----------|
| O | -0.941541 | 8.637235  | 0.196828  |
| H | 0.161267  | 9.462666  | 1.309017  |
| H | -2.602988 | 9.110997  | 0.688015  |
| O | 7.536455  | -1.701555 | -0.497123 |
| H | 8.162156  | -2.598249 | -1.910511 |
| H | 8.817044  | -0.495632 | -0.081415 |

point09

|   |           |           |           |
|---|-----------|-----------|-----------|
| C | -1.906930 | -1.140280 | 0.442547  |
| C | -2.603154 | 1.428845  | 0.442438  |
| C | 1.846143  | 2.472011  | 0.040542  |
| C | 0.600619  | -1.825712 | 0.113773  |
| N | -0.535626 | 3.161897  | 0.234315  |
| N | 2.452241  | 0.047513  | -0.070651 |
| H | 1.293843  | -3.720614 | 0.190452  |
| H | -0.904240 | 5.038885  | 0.260756  |
| H | 4.282546  | -0.457595 | -0.235929 |
| S | -5.589859 | 2.671540  | 0.623298  |
| S | 4.284669  | 4.758294  | 0.030810  |
| C | -3.860765 | -3.167009 | 0.833802  |
| H | -4.782547 | -2.923828 | 2.647219  |
| H | -5.316425 | -3.068632 | -0.592214 |
| H | -3.006917 | -5.028480 | 0.771488  |
| O | -5.768984 | 8.880641  | 1.992053  |
| H | -5.801236 | 7.072376  | 2.021219  |
| H | -7.187651 | 9.353662  | 1.007358  |
| O | 10.868004 | 2.259357  | 0.277790  |
| H | 9.904100  | 3.383398  | 1.292830  |
| H | 11.218182 | 3.171875  | -1.228056 |
| O | -0.927298 | 8.644694  | 0.219008  |
| H | 0.124644  | 9.489505  | 1.378856  |



H -2.617957 9.090031 0.662929

O 7.514891 -1.686550 -0.491741

H 8.137920 -2.608221 -1.891884

H 8.805916 -0.488957 -0.085486

point10

C -1.948056 -1.144628 0.457709

C -2.640837 1.415643 0.451679

C 1.807153 2.445587 0.039941

C 0.559950 -1.850308 0.125397

N -0.557225 3.153205 0.239984

N 2.420511 0.026997 -0.061768

H 1.250538 -3.745384 0.220163

H -0.919004 5.031435 0.269966

H 4.250004 -0.476765 -0.227861

S -5.629078 2.693676 0.621370

S 4.272230 4.729472 0.017181

C -3.906833 -3.165571 0.854642

H -4.829274 -2.912540 2.666789

H -5.361858 -3.066234 -0.572226

H -3.059400 -5.030360 0.798239

O -5.767994 8.869405 1.975554

H -5.799318 7.059038 2.028680

H -7.192976 9.325965 0.990840

O 10.921385 2.230466 0.263660

H 10.043964 3.356482 1.346271

H 11.217777 3.150714 -1.244428

O -0.913055 8.652151 0.241186

H 0.088022 9.516347 1.448696

H -2.632923 9.069062 0.637845

O 7.493327 -1.671548 -0.486359

H 8.113687 -2.618191 -1.873257

H 8.794787 -0.482283 -0.089558

FC point to 'n<sub>7</sub>π<sub>7</sub>'\*

point01

C -1.577921 -1.105490 0.321253

C -2.301686 1.534458 0.368497

C 2.158067 2.683411 0.045353

C 0.925966 -1.628944 0.020787

N -0.362827 3.231434 0.188973

N 2.706088 0.211649 -0.141729

H 1.640282 -3.522450 -0.047243

H -0.786126 5.098483 0.187083

H 4.542903 -0.304246 -0.300466

S -5.276117 2.494438 0.638727

S 4.384167 4.988879 0.139840

C -3.492214 -3.178521 0.667073

H -4.408733 -3.014113 2.490659

H -4.952974 -3.087812 -0.752111

H -2.587035 -5.013445 0.557469

O -5.776895 8.970532 2.124052

H -5.816579 7.179071 1.961536

H -7.145056 9.575244 1.139505

O 10.440741 2.490659 0.391173

H 8.932737 3.426075 0.710537

H 11.202300 3.291905 -1.016673

O -1.041239 8.585028 0.041574

H 0.417629 9.274778 0.820141

H -2.498218 9.257770 0.863605

O 7.687408 -1.806578 -0.534792

H 8.331804 -2.528454 -2.040904

H 8.894943 -0.542351 -0.052912

point02

C -1.600275 -1.120831 0.325702

C -2.313255 1.520555 0.366168

C 2.143518 2.652503 -0.003553

C 0.899451 -1.656555 0.013939

N -0.375315 3.214471 0.163329

N 2.687888 0.174467 -0.171056

H 1.604207 -3.553809 -0.051737

H -0.793248 5.080873 0.159720

H 4.519696 -0.348273 -0.337739

S -5.287954 2.494044 0.652721

S 4.393642 4.947819 0.171969

C -3.520352 -3.185761 0.687074

H -4.428713 -3.016324 2.514216

H -4.987397 -3.096626 -0.726460

H -2.621587 -5.023795 0.578147

O -5.767030 8.975814 2.111253

H -5.812926 7.185612 1.991603

H -7.141712 9.562167 1.126050

O 10.473807 2.478187 0.381914

H 9.009492 3.416721 0.826685

H 11.128886 3.326118 -1.058490

O -1.014537 8.594720 0.055505

H 0.409636 9.289380 0.876697

H -2.492966 9.250591 0.844122

O 7.695753 -1.807179 -0.558355

H 8.355747 -2.542479 -2.049325

H 8.900070 -0.543512 -0.070606

point03

|         |           |           |           |
|---------|-----------|-----------|-----------|
| C       | -1.622627 | -1.136169 | 0.330152  |
| C       | -2.324824 | 1.506654  | 0.363840  |
| C       | 2.128969  | 2.621592  | -0.052461 |
| C       | 0.872936  | -1.684167 | 0.007092  |
| N       | -0.387802 | 3.197509  | 0.137687  |
| N       | 2.669688  | 0.137283  | -0.200381 |
| H       | 1.568131  | -3.585170 | -0.056231 |
| H       | -0.800371 | 5.063260  | 0.132358  |
| H       | 4.496486  | -0.392298 | -0.375010 |
| S       | -5.299792 | 2.493647  | 0.666716  |
| S       | 4.403117  | 4.906761  | 0.204096  |
| C       | -3.548488 | -3.193002 | 0.707077  |
| H       | -4.448693 | -3.018533 | 2.537774  |
| H       | -5.021821 | -3.105442 | -0.700809 |
| H       | -2.656137 | -5.034145 | 0.598822  |
| O       | -5.757166 | 8.981093  | 2.098454  |
| H       | -5.809273 | 7.192152  | 2.021669  |
| H       | -7.138367 | 9.549090  | 1.112595  |
| O       | 10.506877 | 2.465904  | 0.372465  |
| H       | 9.089785  | 3.406239  | 0.947365  |
| H       | 11.046387 | 3.355606  | -1.090491 |
| O       | -0.987837 | 8.604412  | 0.069436  |
| H       | 0.401641  | 9.303982  | 0.933251  |
| H       | -2.487715 | 9.243414  | 0.824639  |
| O       | 7.704098  | -1.807780 | -0.581917 |
| H       | 8.379688  | -2.556505 | -2.057744 |
| H       | 8.905195  | -0.544674 | -0.088297 |
| point04 |           |           |           |
| C       | -1.644980 | -1.151510 | 0.334601  |
| C       | -2.336391 | 1.492751  | 0.361514  |

|         |           |           |           |
|---------|-----------|-----------|-----------|
| C       | 2.114420  | 2.590682  | -0.101367 |
| C       | 0.846420  | -1.711778 | 0.000244  |
| N       | -0.400291 | 3.180549  | 0.112044  |
| N       | 2.651486  | 0.100101  | -0.229706 |
| H       | 1.532056  | -3.616530 | -0.060726 |
| H       | -0.807493 | 5.045650  | 0.104995  |
| H       | 4.473278  | -0.436323 | -0.412283 |
| S       | -5.311631 | 2.493250  | 0.680710  |
| S       | 4.412592  | 4.865701  | 0.236225  |
| C       | -3.576624 | -3.200244 | 0.727078  |
| H       | -4.468673 | -3.020742 | 2.561331  |
| H       | -5.056244 | -3.114255 | -0.675158 |
| H       | -2.690687 | -5.044495 | 0.619499  |
| O       | -5.747302 | 8.986375  | 2.085653  |
| H       | -5.805620 | 7.198692  | 2.051736  |
| H       | -7.135022 | 9.536013  | 1.099140  |
| O       | 10.540136 | 2.453431  | 0.363205  |
| H       | 9.180800  | 3.389893  | 1.068990  |
| H       | 10.958170 | 3.381672  | -1.115477 |
| O       | -0.961135 | 8.614105  | 0.083367  |
| H       | 0.393645  | 9.318583  | 0.989806  |
| H       | -2.482463 | 9.236235  | 0.805156  |
| O       | 7.712443  | -1.808381 | -0.605480 |
| H       | 8.403629  | -2.570530 | -2.066162 |
| H       | 8.910319  | -0.545834 | -0.105991 |
| point05 |           |           |           |
| C       | -1.667332 | -1.166851 | 0.339051  |
| C       | -2.347960 | 1.478851  | 0.359186  |
| C       | 2.099871  | 2.559774  | -0.150275 |
| C       | 0.819905  | -1.739389 | -0.006605 |

|         |           |           |           |
|---------|-----------|-----------|-----------|
| N       | -0.412779 | 3.163587  | 0.086400  |
| N       | 2.633286  | 0.062917  | -0.259032 |
| H       | 1.495979  | -3.647890 | -0.065220 |
| H       | -0.814616 | 5.028040  | 0.077634  |
| H       | 4.450071  | -0.480349 | -0.449556 |
| S       | -5.323468 | 2.492853  | 0.694703  |
| S       | 4.422069  | 4.824643  | 0.268354  |
| C       | -3.604762 | -3.207485 | 0.747079  |
| H       | -4.488655 | -3.022951 | 2.584886  |
| H       | -5.090667 | -3.123069 | -0.649508 |
| H       | -2.725236 | -5.054845 | 0.640177  |
| O       | -5.737437 | 8.991655  | 2.072854  |
| H       | -5.801969 | 7.205231  | 2.081804  |
| H       | -7.131677 | 9.522935  | 1.085685  |
| O       | 10.573207 | 2.441148  | 0.353946  |
| H       | 9.281634  | 3.367343  | 1.188745  |
| H       | 10.865870 | 3.403418  | -1.133087 |
| O       | -0.934434 | 8.623797  | 0.097298  |
| H       | 0.385652  | 9.333185  | 1.046360  |
| H       | -2.477212 | 9.229056  | 0.785671  |
| O       | 7.720788  | -1.808982 | -0.629041 |
| H       | 8.427572  | -2.584556 | -2.074581 |
| H       | 8.915444  | -0.546996 | -0.123684 |
| point06 |           |           |           |
| C       | -1.689685 | -1.182190 | 0.343499  |
| C       | -2.359529 | 1.464948  | 0.356858  |
| C       | 2.085322  | 2.528864  | -0.199181 |
| C       | 0.793390  | -1.767000 | -0.013451 |
| N       | -0.425266 | 3.146625  | 0.060758  |
| N       | 2.615084  | 0.025734  | -0.288357 |

|         |           |           |           |
|---------|-----------|-----------|-----------|
| H       | 1.459904  | -3.679250 | -0.069714 |
| H       | -0.821738 | 5.010429  | 0.050270  |
| H       | 4.426863  | -0.524374 | -0.486827 |
| S       | -5.335305 | 2.492456  | 0.708696  |
| S       | 4.431544  | 4.783583  | 0.300482  |
| C       | -3.632898 | -3.214726 | 0.767080  |
| H       | -4.508635 | -3.025162 | 2.608444  |
| H       | -5.125090 | -3.131883 | -0.623857 |
| H       | -2.759788 | -5.065195 | 0.660852  |
| O       | -5.727573 | 8.996937  | 2.060055  |
| H       | -5.798317 | 7.211771  | 2.111869  |
| H       | -7.128332 | 9.509858  | 1.072231  |
| O       | 10.606277 | 2.428676  | 0.344497  |
| H       | 9.391790  | 3.338485  | 1.303745  |
| H       | 10.771409 | 3.420274  | -1.142899 |
| O       | -0.907732 | 8.633490  | 0.111231  |
| H       | 0.377656  | 9.347785  | 1.102916  |
| H       | -2.471958 | 9.221877  | 0.766188  |
| O       | 7.729133  | -1.809583 | -0.652604 |
| H       | 8.451513  | -2.598581 | -2.083000 |
| H       | 8.920569  | -0.548157 | -0.141376 |
| point07 |           |           |           |
| C       | -1.712039 | -1.197531 | 0.347948  |
| C       | -2.371096 | 1.451045  | 0.354530  |
| C       | 2.070773  | 2.497953  | -0.248089 |
| C       | 0.766875  | -1.794612 | -0.020299 |
| N       | -0.437755 | 3.129664  | 0.035115  |
| N       | 2.596884  | -0.011448 | -0.317684 |
| H       | 1.423827  | -3.710610 | -0.074208 |
| H       | -0.828860 | 4.992819  | 0.022907  |

|         |           |           |           |
|---------|-----------|-----------|-----------|
| H       | 4.403655  | -0.568401 | -0.524100 |
| S       | -5.347144 | 2.492059  | 0.722692  |
| S       | 4.441019  | 4.742523  | 0.332611  |
| C       | -3.661034 | -3.221968 | 0.787082  |
| H       | -4.528615 | -3.027371 | 2.632001  |
| H       | -5.159514 | -3.140696 | -0.598206 |
| H       | -2.794338 | -5.075545 | 0.681530  |
| O       | -5.717708 | 9.002217  | 2.047254  |
| H       | -5.794664 | 7.218312  | 2.141937  |
| H       | -7.124987 | 9.496781  | 1.058776  |
| O       | 10.639347 | 2.416204  | 0.335237  |
| H       | 9.509667  | 3.303767  | 1.411778  |
| H       | 10.676786 | 3.431650  | -1.144745 |
| O       | -0.881032 | 8.643182  | 0.125162  |
| H       | 0.369663  | 9.362387  | 1.159470  |
| H       | -2.466707 | 9.214698  | 0.746704  |
| O       | 7.737478  | -1.810184 | -0.676167 |
| H       | 8.475454  | -2.612607 | -2.091418 |
| H       | 8.925696  | -0.549319 | -0.159070 |
| point08 |           |           |           |
| C       | -1.734391 | -1.212870 | 0.352398  |
| C       | -2.382665 | 1.437142  | 0.352203  |
| C       | 2.056224  | 2.467043  | -0.296995 |
| C       | 0.740359  | -1.822223 | -0.027148 |
| N       | -0.450242 | 3.112702  | 0.009471  |
| N       | 2.578682  | -0.048632 | -0.347009 |
| H       | 1.387751  | -3.741970 | -0.078701 |
| H       | -0.835983 | 4.975209  | -0.004454 |
| H       | 4.380446  | -0.612426 | -0.561371 |
| S       | -5.358982 | 2.491662  | 0.736685  |



|         |           |           |           |
|---------|-----------|-----------|-----------|
| S       | 4.450496  | 4.701465  | 0.364740  |
| C       | -3.689171 | -3.229209 | 0.807083  |
| H       | -4.548595 | -3.029581 | 2.655557  |
| H       | -5.193937 | -3.149510 | -0.572555 |
| H       | -2.828888 | -5.085896 | 0.702207  |
| O       | -5.707844 | 9.007499  | 2.034455  |
| H       | -5.791011 | 7.224852  | 2.172004  |
| H       | -7.121643 | 9.483704  | 1.045321  |
| O       | 10.672417 | 2.403921  | 0.325789  |
| H       | 9.633319  | 3.263686  | 1.510679  |
| H       | 10.584006 | 3.437588  | -1.139339 |
| O       | -0.854330 | 8.652875  | 0.139093  |
| H       | 0.361667  | 9.376989  | 1.216026  |
| H       | -2.461455 | 9.207519  | 0.727221  |
| O       | 7.745823  | -1.810785 | -0.699728 |
| H       | 8.499397  | -2.626632 | -2.099837 |
| H       | 8.930821  | -0.550479 | -0.176763 |
| point09 |           |           |           |
| C       | -1.756744 | -1.228210 | 0.356846  |
| C       | -2.394232 | 1.423242  | 0.349875  |
| C       | 2.041673  | 2.436135  | -0.345903 |
| C       | 0.713844  | -1.849834 | -0.033996 |
| N       | -0.462730 | 3.095740  | -0.016170 |
| N       | 2.560483  | -0.085814 | -0.376335 |
| H       | 1.351676  | -3.773330 | -0.083195 |
| H       | -0.843105 | 4.957598  | -0.031817 |
| H       | 4.357238  | -0.656453 | -0.598644 |
| S       | -5.370819 | 2.491266  | 0.750679  |
| S       | 4.459971  | 4.660405  | 0.396867  |
| C       | -3.717309 | -3.236451 | 0.827084  |

|         |           |           |           |
|---------|-----------|-----------|-----------|
| H       | -4.568577 | -3.031790 | 2.679114  |
| H       | -5.228360 | -3.158324 | -0.546904 |
| H       | -2.863438 | -5.096246 | 0.722883  |
| O       | -5.697980 | 9.012779  | 2.021655  |
| H       | -5.787358 | 7.231392  | 2.202070  |
| H       | -7.118298 | 9.470625  | 1.031866  |
| O       | 10.705676 | 2.391448  | 0.316529  |
| H       | 9.760466  | 3.219113  | 1.598884  |
| H       | 10.494893 | 3.437837  | -1.126912 |
| O       | -0.827628 | 8.662567  | 0.153024  |
| H       | 0.353674  | 9.391591  | 1.272581  |
| H       | -2.456204 | 9.200340  | 0.707738  |
| O       | 7.754168  | -1.811386 | -0.723291 |
| H       | 8.523338  | -2.640658 | -2.108258 |
| H       | 8.935946  | -0.551641 | -0.194455 |
| point10 |           |           |           |
| C       | -1.779096 | -1.243549 | 0.361295  |
| C       | -2.405801 | 1.409339  | 0.347547  |
| C       | 2.027124  | 2.405225  | -0.394809 |
| C       | 0.687329  | -1.877445 | -0.040843 |
| N       | -0.475217 | 3.078780  | -0.041814 |
| N       | 2.542283  | -0.122998 | -0.405660 |
| H       | 1.315599  | -3.804690 | -0.087691 |
| H       | -0.850227 | 4.939986  | -0.059179 |
| H       | 4.334030  | -0.700478 | -0.635916 |
| S       | -5.382658 | 2.490871  | 0.764672  |
| S       | 4.469446  | 4.619347  | 0.428996  |
| C       | -3.745445 | -3.243692 | 0.847085  |
| H       | -4.588557 | -3.033999 | 2.702671  |
| H       | -5.262783 | -3.167138 | -0.521253 |

|   |           |           |           |
|---|-----------|-----------|-----------|
| H | -2.897988 | -5.106596 | 0.743560  |
| O | -5.688115 | 9.018060  | 2.008856  |
| H | -5.783705 | 7.237933  | 2.232137  |
| H | -7.114953 | 9.457548  | 1.018411  |
| O | 10.738703 | 2.379071  | 0.307220  |
| H | 9.889708  | 3.170713  | 1.675155  |
| H | 10.411454 | 3.431259  | -1.106510 |
| O | -0.800926 | 8.672259  | 0.166955  |
| H | 0.345678  | 9.406193  | 1.329135  |
| H | -2.450952 | 9.193162  | 0.688253  |
| O | 7.762511  | -1.811987 | -0.746852 |
| H | 8.547278  | -2.654682 | -2.116677 |
| H | 8.941071  | -0.552802 | -0.212148 |

${}^1\pi_7\pi_8^*$  to  ${}^1n_8\pi_8^*$

point01

|   |           |           |           |
|---|-----------|-----------|-----------|
| C | -1.946418 | -1.147064 | 0.457314  |
| C | -2.638058 | 1.413515  | 0.451645  |
| C | 1.810358  | 2.441526  | 0.039684  |
| C | 0.561249  | -1.853821 | 0.124722  |
| N | -0.553690 | 3.150175  | 0.239995  |
| N | 2.422629  | 0.022677  | -0.062361 |
| H | 1.250999  | -3.749219 | 0.219208  |
| H | -0.914627 | 5.028563  | 0.270231  |
| H | 4.251886  | -0.481880 | -0.228657 |
| S | -5.625717 | 2.692860  | 0.621720  |
| S | 4.276452  | 4.724317  | 0.017008  |
| C | -3.906066 | -3.167183 | 0.854156  |
| H | -4.828252 | -2.913958 | 2.666404  |
| H | -5.361155 | -3.067027 | -0.572587 |
| H | -3.059468 | -5.032343 | 0.797464  |

|   |           |           |           |
|---|-----------|-----------|-----------|
| O | -5.761777 | 8.868487  | 1.976654  |
| H | -5.793902 | 7.058129  | 2.029566  |
| H | -7.186630 | 9.325800  | 0.992106  |
| O | 10.924511 | 2.222318  | 0.262672  |
| H | 10.047676 | 3.348597  | 1.345485  |
| H | 11.221198 | 3.142616  | -1.245330 |
| O | -0.907069 | 8.649278  | 0.241885  |
| H | 0.094486  | 9.512883  | 1.449420  |
| H | -2.626719 | 9.066908  | 0.638727  |
| O | 7.494656  | -1.678077 | -0.487549 |
| H | 8.114486  | -2.624830 | -1.874608 |
| H | 8.796677  | -0.489439 | -0.090707 |

point02

|   |           |           |           |
|---|-----------|-----------|-----------|
| C | -1.901335 | -1.137332 | 0.446610  |
| C | -2.587747 | 1.419513  | 0.450048  |
| C | 1.854037  | 2.472620  | 0.039750  |
| C | 0.609015  | -1.829778 | 0.109564  |
| N | -0.522356 | 3.165066  | 0.239476  |
| N | 2.462557  | 0.051635  | -0.077908 |
| H | 1.301985  | -3.723962 | 0.180053  |
| H | -0.889666 | 5.041595  | 0.269978  |
| H | 4.291143  | -0.453472 | -0.246129 |
| S | -5.595065 | 2.668004  | 0.642237  |
| S | 4.294476  | 4.762382  | 0.029289  |
| C | -3.857558 | -3.162147 | 0.837959  |
| H | -4.776774 | -2.923397 | 2.653372  |
| H | -5.314549 | -3.062895 | -0.587714 |
| H | -3.007108 | -5.024638 | 0.771758  |
| O | -5.795306 | 8.882712  | 1.954735  |
| H | -5.818111 | 7.074864  | 2.018936  |

|   |           |           |           |
|---|-----------|-----------|-----------|
| H | -7.221195 | 9.328401  | 0.967065  |
| O | 10.876003 | 2.259092  | 0.277332  |
| H | 9.926801  | 3.361326  | 1.274312  |
| H | 11.221865 | 3.165936  | -1.220997 |
| O | -0.938757 | 8.644087  | 0.220317  |
| H | 0.106968  | 9.515969  | 1.365291  |
| H | -2.635038 | 9.101913  | 0.641556  |
| O | 7.524978  | -1.689160 | -0.499434 |
| H | 8.152297  | -2.610305 | -1.897860 |
| H | 8.812823  | -0.490123 | -0.090391 |

point03

|   |           |           |           |
|---|-----------|-----------|-----------|
| C | -1.856250 | -1.127600 | 0.435909  |
| C | -2.537439 | 1.425511  | 0.448451  |
| C | 1.897716  | 2.503711  | 0.039815  |
| C | 0.656782  | -1.805733 | 0.094405  |
| N | -0.491023 | 3.179957  | 0.238956  |
| N | 2.502483  | 0.080591  | -0.093455 |
| H | 1.352972  | -3.698708 | 0.140896  |
| H | -0.864705 | 5.054626  | 0.269726  |
| H | 4.330400  | -0.425064 | -0.263602 |
| S | -5.564416 | 2.643149  | 0.662752  |
| S | 4.312502  | 4.800447  | 0.041572  |
| C | -3.809053 | -3.157113 | 0.821764  |
| H | -4.725298 | -2.932836 | 2.640339  |
| H | -5.267942 | -3.058762 | -0.602840 |
| H | -2.954749 | -5.016936 | 0.746053  |
| O | -5.828834 | 8.896936  | 1.932816  |
| H | -5.842321 | 7.091602  | 2.008305  |
| H | -7.255760 | 9.331001  | 0.942023  |
| O | 10.827498 | 2.295866  | 0.291993  |

|         |           |           |           |
|---------|-----------|-----------|-----------|
| H       | 9.805927  | 3.374057  | 1.203138  |
| H       | 11.222534 | 3.189257  | -1.196665 |
| O       | -0.970446 | 8.638894  | 0.198750  |
| H       | 0.119450  | 9.519055  | 1.281161  |
| H       | -2.643355 | 9.136918  | 0.644383  |
| O       | 7.555301  | -1.700241 | -0.511316 |
| H       | 8.190107  | -2.595781 | -1.921109 |
| H       | 8.828967  | -0.490807 | -0.090074 |
| point04 |           |           |           |
| C       | -1.811166 | -1.117867 | 0.425205  |
| C       | -2.487129 | 1.431509  | 0.446854  |
| C       | 1.941393  | 2.534805  | 0.039881  |
| C       | 0.704550  | -1.781689 | 0.079246  |
| N       | -0.459689 | 3.194848  | 0.238438  |
| N       | 2.542411  | 0.109547  | -0.109001 |
| H       | 1.403959  | -3.673454 | 0.101741  |
| H       | -0.839741 | 5.067658  | 0.269473  |
| H       | 4.369657  | -0.396655 | -0.281074 |
| S       | -5.533764 | 2.618293  | 0.683266  |
| S       | 4.330529  | 4.838511  | 0.053853  |
| C       | -3.760546 | -3.152078 | 0.805568  |
| H       | -4.673822 | -2.942273 | 2.627307  |
| H       | -5.221336 | -3.054631 | -0.617967 |
| H       | -2.902391 | -5.009231 | 0.720345  |
| O       | -5.862363 | 8.911160  | 1.910897  |
| H       | -5.866532 | 7.108337  | 1.997675  |
| H       | -7.290325 | 9.333599  | 0.916982  |
| O       | 10.778990 | 2.332638  | 0.306652  |
| H       | 9.685050  | 3.386788  | 1.131963  |
| H       | 11.223203 | 3.212576  | -1.172333 |

|   |           |           |           |
|---|-----------|-----------|-----------|
| O | -1.002135 | 8.633701  | 0.177181  |
| H | 0.131931  | 9.522141  | 1.197032  |
| H | -2.651673 | 9.171926  | 0.647212  |
| O | 7.585623  | -1.711325 | -0.523201 |
| H | 8.227919  | -2.581256 | -1.944358 |
| H | 8.845111  | -0.491491 | -0.089758 |

point05

|   |           |           |           |
|---|-----------|-----------|-----------|
| C | -1.766081 | -1.108137 | 0.414502  |
| C | -2.436819 | 1.437507  | 0.445259  |
| C | 1.985072  | 2.565897  | 0.039947  |
| C | 0.752317  | -1.757646 | 0.064088  |
| N | -0.428356 | 3.209740  | 0.237918  |
| N | 2.582337  | 0.138506  | -0.124548 |
| H | 1.454946  | -3.648199 | 0.062586  |
| H | -0.814780 | 5.080689  | 0.269220  |
| H | 4.408914  | -0.368247 | -0.298545 |
| S | -5.503113 | 2.593439  | 0.703783  |
| S | 4.348553  | 4.876576  | 0.066137  |
| C | -3.712040 | -3.147044 | 0.789371  |
| H | -4.622344 | -2.951713 | 2.614274  |
| H | -5.174730 | -3.050498 | -0.633092 |
| H | -2.850032 | -5.001529 | 0.694639  |
| O | -5.895893 | 8.925384  | 1.888978  |
| H | -5.890741 | 7.125073  | 1.987043  |
| H | -7.324890 | 9.336199  | 0.891939  |
| O | 10.730485 | 2.369412  | 0.321312  |
| H | 9.564176  | 3.399517  | 1.060790  |
| H | 11.223871 | 3.235897  | -1.148001 |
| O | -1.033824 | 8.628508  | 0.155613  |
| H | 0.144413  | 9.525227  | 1.112903  |

H -2.659990 9.206929 0.650039

O 7.615946 -1.722408 -0.535084

H 8.265730 -2.566732 -1.967609

H 8.861256 -0.492177 -0.089443

point06

C -1.720998 -1.098405 0.403799

C -2.386509 1.443503 0.443662

C 2.028749 2.596990 0.040013

C 0.800084 -1.733601 0.048929

N -0.397020 3.224632 0.237399

N 2.622263 0.167462 -0.140095

H 1.505932 -3.622945 0.023429

H -0.789819 5.093721 0.268967

H 4.448172 -0.339839 -0.316017

S -5.472464 2.568584 0.724298

S 4.366579 4.914643 0.078418

C -3.663535 -3.142010 0.773174

H -4.570868 -2.961152 2.601240

H -5.128123 -3.046365 -0.648220

H -2.797673 -4.993826 0.668933

O -5.929420 8.939610 1.867059

H -5.914950 7.141810 1.976414

H -7.359455 9.338800 0.866899

O 10.681979 2.406186 0.335973

H 9.443300 3.412248 0.989616

H 11.224539 3.259218 -1.123669

O -1.065513 8.623315 0.134046

H 0.156895 9.528311 1.028773

H -2.668308 9.241936 0.652868

O 7.646268 -1.733489 -0.546968



|         |           |           |           |
|---------|-----------|-----------|-----------|
| H       | 8.303540  | -2.552207 | -1.990859 |
| H       | 8.877400  | -0.492861 | -0.089125 |
| point07 |           |           |           |
| C       | -1.675913 | -1.088673 | 0.393095  |
| C       | -2.336198 | 1.449501  | 0.442066  |
| C       | 2.072429  | 2.628084  | 0.040077  |
| C       | 0.847850  | -1.709558 | 0.033771  |
| N       | -0.365687 | 3.239523  | 0.236879  |
| N       | 2.662191  | 0.196420  | -0.155640 |
| H       | 1.556919  | -3.597691 | -0.015726 |
| H       | -0.764857 | 5.106752  | 0.268715  |
| H       | 4.487431  | -0.311431 | -0.333489 |
| S       | -5.441812 | 2.543728  | 0.744815  |
| S       | 4.384605  | 4.952708  | 0.090701  |
| C       | -3.615027 | -3.136974 | 0.756979  |
| H       | -4.519392 | -2.970589 | 2.588209  |
| H       | -5.081517 | -3.042234 | -0.663345 |
| H       | -2.745315 | -4.986122 | 0.643225  |
| O       | -5.962950 | 8.953834  | 1.845140  |
| H       | -5.939160 | 7.158545  | 1.965782  |
| H       | -7.394020 | 9.341398  | 0.841858  |
| O       | 10.633472 | 2.442959  | 0.350633  |
| H       | 9.322425  | 3.424979  | 0.918441  |
| H       | 11.225208 | 3.282537  | -1.099337 |
| O       | -1.097201 | 8.618122  | 0.112478  |
| H       | 0.169376  | 9.531397  | 0.944644  |
| H       | -2.676625 | 9.276941  | 0.655697  |
| O       | 7.676591  | -1.744572 | -0.558851 |
| H       | 8.341351  | -2.537683 | -2.014110 |
| H       | 8.893546  | -0.493545 | -0.088810 |

point08

|   |           |           |           |
|---|-----------|-----------|-----------|
| C | -1.630830 | -1.078941 | 0.382394  |
| C | -2.285888 | 1.455499  | 0.440469  |
| C | 2.116106  | 2.659175  | 0.040143  |
| C | 0.895617  | -1.685513 | 0.018612  |
| N | -0.334353 | 3.254415  | 0.236361  |
| N | 2.702117  | 0.225376  | -0.171187 |
| H | 1.607906  | -3.572437 | -0.054883 |
| H | -0.739894 | 5.119784  | 0.268462  |
| H | 4.526688  | -0.283022 | -0.350962 |
| S | -5.411161 | 2.518873  | 0.765330  |
| S | 4.402629  | 4.990772  | 0.102983  |
| C | -3.566522 | -3.131939 | 0.740782  |
| H | -4.467913 | -2.980028 | 2.575175  |
| H | -5.034911 | -3.038101 | -0.678472 |
| H | -2.692956 | -4.978419 | 0.617519  |
| O | -5.996479 | 8.968058  | 1.823223  |
| H | -5.963371 | 7.175281  | 1.955152  |
| H | -7.428585 | 9.343998  | 0.816815  |
| O | 10.584966 | 2.479733  | 0.365294  |
| H | 9.201551  | 3.437710  | 0.847266  |
| H | 11.225876 | 3.305859  | -1.075005 |
| O | -1.128890 | 8.612929  | 0.090909  |
| H | 0.181858  | 9.534483  | 0.860513  |
| H | -2.684942 | 9.311947  | 0.658524  |
| O | 7.706912  | -1.755656 | -0.570735 |
| H | 8.379163  | -2.523159 | -2.037359 |
| H | 8.909690  | -0.494230 | -0.088494 |

point09

|   |           |           |          |
|---|-----------|-----------|----------|
| C | -1.585745 | -1.069209 | 0.371690 |
|---|-----------|-----------|----------|

|         |           |           |           |
|---------|-----------|-----------|-----------|
| C       | -2.235580 | 1.461497  | 0.438872  |
| C       | 2.159785  | 2.690269  | 0.040210  |
| C       | 0.943383  | -1.661470 | 0.003454  |
| N       | -0.303019 | 3.269306  | 0.235842  |
| N       | 2.742046  | 0.254334  | -0.186733 |
| H       | 1.658892  | -3.547182 | -0.094038 |
| H       | -0.714933 | 5.132816  | 0.268209  |
| H       | 4.565945  | -0.254614 | -0.368434 |
| S       | -5.380511 | 2.494017  | 0.785844  |
| S       | 4.420655  | 5.028837  | 0.115266  |
| C       | -3.518014 | -3.126905 | 0.724585  |
| H       | -4.416437 | -2.989467 | 2.562142  |
| H       | -4.988304 | -3.033970 | -0.693599 |
| H       | -2.640597 | -4.970715 | 0.591813  |
| O       | -6.030008 | 8.982284  | 1.801304  |
| H       | -5.987580 | 7.192018  | 1.944521  |
| H       | -7.463150 | 9.346599  | 0.791774  |
| O       | 10.536461 | 2.516507  | 0.379954  |
| H       | 9.080674  | 3.450440  | 0.776094  |
| H       | 11.226544 | 3.329180  | -1.050673 |
| O       | -1.160577 | 8.607738  | 0.069342  |
| H       | 0.194339  | 9.537569  | 0.776385  |
| H       | -2.693260 | 9.346952  | 0.661353  |
| O       | 7.737234  | -1.766737 | -0.582618 |
| H       | 8.416972  | -2.508634 | -2.060608 |
| H       | 8.925834  | -0.494914 | -0.088178 |
| point10 |           |           |           |
| C       | -1.540662 | -1.059477 | 0.360987  |
| C       | -2.185270 | 1.467495  | 0.437275  |
| C       | 2.203464  | 2.721361  | 0.040274  |

|   |           |           |           |
|---|-----------|-----------|-----------|
| C | 0.991150  | -1.637425 | -0.011705 |
| N | -0.271686 | 3.284199  | 0.235322  |
| N | 2.781972  | 0.283291  | -0.202280 |
| H | 1.709879  | -3.521928 | -0.133194 |
| H | -0.689971 | 5.145847  | 0.267956  |
| H | 4.605202  | -0.226206 | -0.385907 |
| S | -5.349860 | 2.469162  | 0.806361  |
| S | 4.438681  | 5.066902  | 0.127547  |
| C | -3.469509 | -3.121871 | 0.708390  |
| H | -4.364961 | -2.998905 | 2.549110  |
| H | -4.941698 | -3.029838 | -0.708725 |
| H | -2.588239 | -4.963012 | 0.566107  |
| O | -6.063538 | 8.996508  | 1.779385  |
| H | -6.011789 | 7.208753  | 1.933891  |
| H | -7.497715 | 9.349197  | 0.766732  |
| O | 10.487954 | 2.553279  | 0.394613  |
| H | 8.959800  | 3.463171  | 0.704919  |
| H | 11.227213 | 3.352499  | -1.026340 |
| O | -1.192266 | 8.602545  | 0.047774  |
| H | 0.206821  | 9.540655  | 0.692256  |
| H | -2.701577 | 9.381957  | 0.664182  |
| O | 7.767557  | -1.777820 | -0.594502 |
| H | 8.454784  | -2.494110 | -2.083860 |
| H | 8.941980  | -0.495598 | -0.087861 |

### Snapshot3

FC point to  ${}^1\pi_7\pi_8^*$

point01

|   |           |           |          |
|---|-----------|-----------|----------|
| C | -0.232436 | -1.632723 | 0.147399 |
| C | -1.175410 | 0.950532  | 0.105825 |

|         |           |           |           |
|---------|-----------|-----------|-----------|
| C       | 3.167183  | 2.466093  | -0.009449 |
| C       | 2.303576  | -1.948308 | 0.124722  |
| N       | 0.616051  | 2.794905  | 0.039684  |
| N       | 3.947640  | 0.052912  | 0.060471  |
| H       | 3.189860  | -3.768116 | 0.164406  |
| H       | 0.013228  | 4.614713  | -0.060471 |
| H       | 5.810910  | -0.330702 | -0.013228 |
| S       | -4.229209 | 1.653510  | 0.124722  |
| S       | 5.147616  | 4.992658  | -0.175745 |
| C       | -2.027676 | -3.828587 | 0.221098  |
| H       | -3.095371 | -3.853153 | 1.965315  |
| H       | -3.375053 | -3.728432 | -1.313360 |
| H       | -0.995886 | -5.587922 | 0.062361  |
| O       | 9.032893  | -1.861380 | -0.194642 |
| H       | 10.064685 | -0.368497 | -0.181414 |
| H       | 9.628156  | -2.847817 | -1.564693 |
| O       | -0.899510 | 7.963308  | -0.207870 |
| H       | -2.386724 | 8.362040  | 0.735103  |
| H       | 0.438416  | 8.968642  | 0.419519  |
| O       | 11.164506 | 2.981988  | -0.500777 |
| H       | 9.560126  | 3.743549  | -0.823921 |
| H       | 11.703078 | 3.694415  | 1.052577  |
| O       | -5.669180 | 7.702526  | 2.246884  |
| H       | -7.016555 | 8.112596  | 1.141395  |
| H       | -5.429185 | 5.929962  | 2.057912  |
| point02 |           |           |           |
| C       | -0.254161 | -1.628364 | 0.154716  |
| C       | -1.196454 | 0.944544  | 0.110795  |
| C       | 3.147515  | 2.451355  | 0.005119  |
| C       | 2.286712  | -1.961419 | 0.137695  |

|         |           |           |           |
|---------|-----------|-----------|-----------|
| N       | 0.610631  | 2.797649  | 0.047963  |
| N       | 3.935264  | 0.043898  | 0.075914  |
| H       | 3.168914  | -3.782429 | 0.181605  |
| H       | 0.012939  | 4.618468  | -0.051170 |
| H       | 5.799605  | -0.335608 | 0.001364  |
| S       | -4.251786 | 1.678398  | 0.111643  |
| S       | 5.154872  | 4.974700  | -0.158300 |
| C       | -2.052411 | -3.822032 | 0.224481  |
| H       | -3.116939 | -3.847263 | 1.970597  |
| H       | -3.402329 | -3.711913 | -1.306400 |
| H       | -1.025755 | -5.584039 | 0.059678  |
| O       | 9.034673  | -1.814426 | -0.204414 |
| H       | 10.063636 | -0.323582 | -0.223137 |
| H       | 9.619294  | -2.823531 | -1.559961 |
| O       | -0.888895 | 7.980657  | -0.195895 |
| H       | -2.401723 | 8.337715  | 0.706778  |
| H       | 0.392052  | 9.021335  | 0.459179  |
| O       | 11.206832 | 3.015058  | -0.566540 |
| H       | 9.638469  | 3.857545  | -0.766004 |
| H       | 11.911127 | 3.712409  | 0.925773  |
| O       | -5.662292 | 7.690841  | 2.236022  |
| H       | -7.018511 | 8.083583  | 1.136419  |
| H       | -5.416303 | 5.916825  | 2.059679  |
| point03 |           |           |           |
| C       | -0.275883 | -1.624002 | 0.162033  |
| C       | -1.217498 | 0.938555  | 0.115767  |
| C       | 3.127848  | 2.436617  | 0.019685  |
| C       | 2.269850  | -1.974529 | 0.150670  |
| N       | 0.605211  | 2.800393  | 0.056244  |
| N       | 3.922888  | 0.034884  | 0.091355  |

|         |           |           |           |
|---------|-----------|-----------|-----------|
| H       | 3.147968  | -3.796743 | 0.198803  |
| H       | 0.012650  | 4.622223  | -0.041869 |
| H       | 5.788301  | -0.340514 | 0.015959  |
| S       | -4.274364 | 1.703284  | 0.098564  |
| S       | 5.162131  | 4.956742  | -0.140858 |
| C       | -2.077143 | -3.815478 | 0.227863  |
| H       | -3.138506 | -3.841375 | 1.975879  |
| H       | -3.429607 | -3.695395 | -1.299440 |
| H       | -1.055626 | -5.580153 | 0.056996  |
| O       | 9.036451  | -1.767472 | -0.214185 |
| H       | 10.062589 | -0.278668 | -0.264858 |
| H       | 9.610431  | -2.799244 | -1.555228 |
| O       | -0.878279 | 7.998007  | -0.183919 |
| H       | -2.416720 | 8.313391  | 0.678453  |
| H       | 0.345688  | 9.074028  | 0.498840  |
| O       | 11.249351 | 3.048128  | -0.632302 |
| H       | 9.718485  | 3.976057  | -0.701088 |
| H       | 12.126922 | 3.721277  | 0.776976  |
| O       | -5.655404 | 7.679157  | 2.225160  |
| H       | -7.020467 | 8.054570  | 1.131443  |
| H       | -5.403422 | 5.903688  | 2.061444  |
| point04 |           |           |           |
| C       | -0.297607 | -1.619643 | 0.169352  |
| C       | -1.238542 | 0.932565  | 0.120736  |
| C       | 3.108182  | 2.421877  | 0.034253  |
| C       | 2.252986  | -1.987640 | 0.163643  |
| N       | 0.599790  | 2.803135  | 0.064523  |
| N       | 3.910512  | 0.025870  | 0.106798  |
| H       | 3.127024  | -3.811058 | 0.216003  |
| H       | 0.012361  | 4.625980  | -0.032568 |

|         |           |           |           |
|---------|-----------|-----------|-----------|
| H       | 5.776997  | -0.345419 | 0.030551  |
| S       | -4.296942 | 1.728172  | 0.085486  |
| S       | 5.169389  | 4.938784  | -0.123416 |
| C       | -2.101876 | -3.808924 | 0.231246  |
| H       | -3.160074 | -3.835485 | 1.981161  |
| H       | -3.456885 | -3.678877 | -1.292480 |
| H       | -1.085495 | -5.576270 | 0.054313  |
| O       | 9.038231  | -1.720518 | -0.223959 |
| H       | 10.061541 | -0.233753 | -0.306582 |
| H       | 9.601568  | -2.774957 | -1.550496 |
| O       | -0.867664 | 8.015357  | -0.171944 |
| H       | -2.431718 | 8.289066  | 0.650128  |
| H       | 0.299323  | 9.126721  | 0.538500  |
| O       | 11.291681 | 3.081009  | -0.697876 |
| H       | 9.813408  | 4.090650  | -0.629562 |
| H       | 12.343593 | 3.719807  | 0.603947  |
| O       | -5.648516 | 7.667471  | 2.214300  |
| H       | -7.022423 | 8.025559  | 1.126468  |
| H       | -5.390540 | 5.890552  | 2.063211  |
| point05 |           |           |           |
| C       | -0.319332 | -1.615281 | 0.176669  |
| C       | -1.259588 | 0.926576  | 0.125708  |
| C       | 3.088515  | 2.407139  | 0.048819  |
| C       | 2.236122  | -2.000751 | 0.176616  |
| N       | 0.594370  | 2.805879  | 0.072802  |
| N       | 3.898137  | 0.016858  | 0.122241  |
| H       | 3.106079  | -3.825373 | 0.233202  |
| H       | 0.012072  | 4.629735  | -0.023266 |
| H       | 5.765692  | -0.350325 | 0.045144  |
| S       | -4.319521 | 1.753059  | 0.072409  |



|   |           |           |           |
|---|-----------|-----------|-----------|
| S | 5.176646  | 4.920826  | -0.105972 |
| C | -2.126609 | -3.802371 | 0.234628  |
| H | -3.181639 | -3.829596 | 1.986440  |
| H | -3.484162 | -3.662361 | -1.285520 |
| H | -1.115364 | -5.572387 | 0.051629  |
| O | 9.040009  | -1.673564 | -0.233731 |
| H | 10.060494 | -0.188840 | -0.348303 |
| H | 9.592703  | -2.750668 | -1.545762 |
| O | -0.857049 | 8.032704  | -0.159969 |
| H | -2.446715 | 8.264742  | 0.621803  |
| H | 0.252961  | 9.179415  | 0.578162  |
| O | 11.334199 | 3.114080  | -0.763638 |
| H | 9.923681  | 4.198524  | -0.554474 |
| H | 12.553056 | 3.707433  | 0.407535  |
| O | -5.641628 | 7.655787  | 2.203438  |
| H | -7.024378 | 7.996546  | 1.121494  |
| H | -5.377660 | 5.877415  | 2.064976  |

point06

|   |           |           |           |
|---|-----------|-----------|-----------|
| C | -0.341054 | -1.610920 | 0.183986  |
| C | -1.280631 | 0.920588  | 0.130678  |
| C | 3.068847  | 2.392401  | 0.063387  |
| C | 2.219258  | -2.013860 | 0.189589  |
| N | 0.588950  | 2.808621  | 0.081082  |
| N | 3.885761  | 0.007844  | 0.137684  |
| H | 3.085135  | -3.839687 | 0.250400  |
| H | 0.011782  | 4.633491  | -0.013965 |
| H | 5.754388  | -0.355229 | 0.059738  |
| S | -4.342099 | 1.777945  | 0.059330  |
| S | 5.183904  | 4.902868  | -0.088528 |
| C | -2.151342 | -3.795815 | 0.238009  |

|         |           |           |           |
|---------|-----------|-----------|-----------|
| H       | -3.203207 | -3.823708 | 1.991722  |
| H       | -3.511440 | -3.645843 | -1.278560 |
| H       | -1.145234 | -5.568503 | 0.048946  |
| O       | 9.041788  | -1.626610 | -0.243503 |
| H       | 10.059447 | -0.143925 | -0.390026 |
| H       | 9.583841  | -2.726382 | -1.541028 |
| O       | -0.846433 | 8.050054  | -0.147994 |
| H       | -2.461714 | 8.240417  | 0.593478  |
| H       | 0.206596  | 9.232108  | 0.617821  |
| O       | 11.376529 | 3.147150  | -0.829401 |
| H       | 10.048108 | 4.297020  | -0.479501 |
| H       | 12.746802 | 3.685548  | 0.191289  |
| O       | -5.634740 | 7.644103  | 2.192576  |
| H       | -7.026334 | 7.967533  | 1.116518  |
| H       | -5.364778 | 5.864277  | 2.066742  |
| point07 |           |           |           |
| C       | -0.362778 | -1.606560 | 0.191303  |
| C       | -1.301675 | 0.914599  | 0.135650  |
| C       | 3.049181  | 2.377661  | 0.077955  |
| C       | 2.202395  | -2.026971 | 0.202564  |
| N       | 0.583530  | 2.811364  | 0.089361  |
| N       | 3.873385  | -0.001170 | 0.153126  |
| H       | 3.064189  | -3.854002 | 0.267598  |
| H       | 0.011493  | 4.637246  | -0.004664 |
| H       | 5.743086  | -0.360135 | 0.074330  |
| S       | -4.364678 | 1.802833  | 0.046251  |
| S       | 5.191161  | 4.884910  | -0.071086 |
| C       | -2.176076 | -3.789262 | 0.241392  |
| H       | -3.224774 | -3.817819 | 1.997004  |
| H       | -3.538718 | -3.629325 | -1.271600 |

|   |           |           |           |
|---|-----------|-----------|-----------|
| H | -1.175104 | -5.564618 | 0.046264  |
| O | 9.043568  | -1.579654 | -0.253274 |
| H | 10.058400 | -0.099010 | -0.431750 |
| H | 9.574978  | -2.702095 | -1.536296 |
| O | -0.835818 | 8.067403  | -0.136019 |
| H | -2.476711 | 8.216093  | 0.565153  |
| H | 0.160232  | 9.284801  | 0.657481  |
| O | 11.419048 | 3.180220  | -0.895163 |
| H | 10.184503 | 4.383966  | -0.409135 |
| H | 12.918020 | 3.656556  | -0.037543 |
| O | -5.627852 | 7.632419  | 2.181713  |
| H | -7.028290 | 7.938520  | 1.111543  |
| H | -5.351897 | 5.851140  | 2.068507  |

point08

|   |           |           |           |
|---|-----------|-----------|-----------|
| C | -0.384503 | -1.602199 | 0.198622  |
| C | -1.322719 | 0.908609  | 0.140620  |
| C | 3.029514  | 2.362923  | 0.092521  |
| C | 2.185531  | -2.040082 | 0.215536  |
| N | 0.578109  | 2.814108  | 0.097642  |
| N | 3.861011  | -0.010184 | 0.168567  |
| H | 3.043245  | -3.868317 | 0.284797  |
| H | 0.011204  | 4.641003  | 0.004637  |
| H | 5.731781  | -0.365040 | 0.088923  |
| S | -4.387256 | 1.827719  | 0.033172  |
| S | 5.198419  | 4.866954  | -0.053642 |
| C | -2.200809 | -3.782708 | 0.244774  |
| H | -3.246342 | -3.811929 | 2.002286  |
| H | -3.565994 | -3.612809 | -1.264641 |
| H | -1.204973 | -5.560735 | 0.043581  |
| O | 9.045346  | -1.532700 | -0.263048 |

|   |           |           |           |
|---|-----------|-----------|-----------|
| H | 10.057351 | -0.054097 | -0.473471 |
| H | 9.566115  | -2.677806 | -1.531563 |
| O | -0.825204 | 8.084753  | -0.124044 |
| H | -2.491710 | 8.191768  | 0.536828  |
| H | 0.113867  | 9.337492  | 0.697143  |
| O | 11.461378 | 3.213290  | -0.960926 |
| H | 10.329721 | 4.458794  | -0.346591 |
| H | 13.063208 | 3.623565  | -0.271620 |
| O | -5.620964 | 7.620734  | 2.170851  |
| H | -7.030246 | 7.909507  | 1.106567  |
| H | -5.339017 | 5.838005  | 2.070272  |

point09

|   |           |           |           |
|---|-----------|-----------|-----------|
| C | -0.406225 | -1.597837 | 0.205939  |
| C | -1.343763 | 0.902620  | 0.145592  |
| C | 3.009846  | 2.348185  | 0.107089  |
| C | 2.168667  | -2.053193 | 0.228509  |
| N | 0.572689  | 2.816850  | 0.105921  |
| N | 3.848635  | -0.019198 | 0.184010  |
| H | 3.022299  | -3.882631 | 0.301995  |
| H | 0.010915  | 4.644758  | 0.013939  |
| H | 5.720477  | -0.369946 | 0.103517  |
| S | -4.409835 | 1.852606  | 0.020093  |
| S | 5.205678  | 4.848996  | -0.036200 |
| C | -2.225542 | -3.776155 | 0.248157  |
| H | -3.267907 | -3.806041 | 2.007566  |
| H | -3.593273 | -3.596291 | -1.257681 |
| H | -1.234843 | -5.556851 | 0.040897  |
| O | 9.047126  | -1.485746 | -0.272820 |
| H | 10.056304 | -0.009182 | -0.515194 |
| H | 9.557250  | -2.653519 | -1.526831 |

|   |           |          |           |
|---|-----------|----------|-----------|
| O | -0.814587 | 8.102102 | -0.112068 |
| H | -2.506707 | 8.167444 | 0.508503  |
| H | 0.067503  | 9.390185 | 0.736802  |
| O | 11.503897 | 3.246172 | -1.026688 |
| H | 10.480189 | 4.521117 | -0.294657 |
| H | 13.182204 | 3.590017 | -0.502873 |
| O | -5.614076 | 7.609048 | 2.159989  |
| H | -7.032202 | 7.880494 | 1.101591  |
| H | -5.326135 | 5.824867 | 2.072039  |

point10

|   |           |           |           |
|---|-----------|-----------|-----------|
| C | -0.427949 | -1.593478 | 0.213256  |
| C | -1.364807 | 0.896632  | 0.150562  |
| C | 2.990180  | 2.333445  | 0.121655  |
| C | 2.151803  | -2.066304 | 0.241484  |
| N | 0.567269  | 2.819594  | 0.114200  |
| N | 3.836259  | -0.028212 | 0.199453  |
| H | 3.001356  | -3.896946 | 0.319196  |
| H | 0.010626  | 4.648513  | 0.023240  |
| H | 5.709173  | -0.374852 | 0.118110  |
| S | -4.432413 | 1.877492  | 0.007015  |
| S | 5.212934  | 4.831038  | -0.018756 |
| C | -2.250275 | -3.769601 | 0.251540  |
| H | -3.289475 | -3.800150 | 2.012847  |
| H | -3.620551 | -3.579772 | -1.250721 |
| H | -1.264712 | -5.552968 | 0.038216  |
| O | 9.048904  | -1.438792 | -0.282592 |
| H | 10.055257 | 0.035733  | -0.556917 |
| H | 9.548387  | -2.629233 | -1.522097 |
| O | -0.803973 | 8.119452  | -0.100093 |
| H | -2.521705 | 8.143119  | 0.480178  |

|   |           |          |           |
|---|-----------|----------|-----------|
| H | 0.021140  | 9.442878 | 0.776464  |
| O | 11.546227 | 3.279278 | -1.092347 |
| H | 10.632805 | 4.571459 | -0.255338 |
| H | 13.275192 | 3.558128 | -0.725916 |
| O | -5.607188 | 7.597364 | 2.149127  |
| H | -7.034158 | 7.851483 | 1.096616  |
| H | -5.313254 | 5.811730 | 2.073806  |

FC point to  $1n_7\pi_7^*$

point01

|   |           |           |           |
|---|-----------|-----------|-----------|
| C | -0.232436 | -1.632723 | 0.147399  |
| C | -1.175410 | 0.950532  | 0.105825  |
| C | 3.167183  | 2.466093  | -0.009449 |
| C | 2.303576  | -1.948308 | 0.124722  |
| N | 0.616051  | 2.794905  | 0.039684  |
| N | 3.947640  | 0.052912  | 0.060471  |
| H | 3.189860  | -3.768116 | 0.164406  |
| H | 0.013228  | 4.614713  | -0.060471 |
| H | 5.810910  | -0.330702 | -0.013228 |
| S | -4.229209 | 1.653510  | 0.124722  |
| S | 5.147616  | 4.992658  | -0.175745 |
| C | -2.027676 | -3.828587 | 0.221098  |
| H | -3.095371 | -3.853153 | 1.965315  |
| H | -3.375053 | -3.728432 | -1.313360 |
| H | -0.995886 | -5.587922 | 0.062361  |
| O | 9.032893  | -1.861380 | -0.194642 |
| H | 10.064685 | -0.368497 | -0.181414 |
| H | 9.628156  | -2.847817 | -1.564693 |
| O | -0.899510 | 7.963308  | -0.207870 |
| H | -2.386724 | 8.362040  | 0.735103  |
| H | 0.438416  | 8.968642  | 0.419519  |

|   |           |          |           |
|---|-----------|----------|-----------|
| O | 11.164506 | 2.981988 | -0.500777 |
| H | 9.560126  | 3.743549 | -0.823921 |
| H | 11.703078 | 3.694415 | 1.052577  |
| O | -5.669180 | 7.702526 | 2.246884  |
| H | -7.016555 | 8.112596 | 1.141395  |
| H | -5.429185 | 5.929962 | 2.057912  |

point02

|   |           |           |           |
|---|-----------|-----------|-----------|
| C | -0.248612 | -1.630289 | 0.157095  |
| C | -1.180391 | 0.958588  | 0.110449  |
| C | 3.164229  | 2.455493  | 0.031872  |
| C | 2.285114  | -1.956235 | 0.143857  |
| N | 0.612232  | 2.798021  | 0.054349  |
| N | 3.940621  | 0.033323  | 0.090276  |
| H | 3.158900  | -3.781247 | 0.183354  |
| H | 0.016658  | 4.618426  | -0.045830 |
| H | 5.800558  | -0.357542 | 0.019511  |
| S | -4.235075 | 1.672317  | 0.108355  |
| S | 5.168250  | 4.972716  | -0.210901 |
| C | -2.052554 | -3.818696 | 0.222228  |
| H | -3.127170 | -3.840989 | 1.962464  |
| H | -3.393438 | -3.714015 | -1.317474 |
| H | -1.027805 | -5.582599 | 0.067082  |
| O | 9.049473  | -1.839325 | -0.189203 |
| H | 10.076562 | -0.346179 | -0.199100 |
| H | 9.647944  | -2.846113 | -1.540764 |
| O | -0.895643 | 7.985448  | -0.194115 |
| H | -2.401129 | 8.357225  | 0.724510  |
| H | 0.403162  | 9.024861  | 0.442487  |
| O | 11.196438 | 3.010523  | -0.537438 |
| H | 9.643499  | 3.789889  | -0.988945 |

|         |           |           |           |
|---------|-----------|-----------|-----------|
| H       | 11.625325 | 3.761991  | 1.035532  |
| O       | -5.675356 | 7.710156  | 2.244928  |
| H       | -7.024006 | 8.091371  | 1.133354  |
| H       | -5.439461 | 5.937818  | 2.104063  |
| point03 |           |           |           |
| C       | -0.264788 | -1.627855 | 0.166791  |
| C       | -1.185372 | 0.966644  | 0.115071  |
| C       | 3.161276  | 2.444892  | 0.073195  |
| C       | 2.266651  | -1.964161 | 0.162993  |
| N       | 0.608412  | 2.801137  | 0.069013  |
| N       | 3.933605  | 0.013735  | 0.120083  |
| H       | 3.127941  | -3.794381 | 0.202303  |
| H       | 0.020088  | 4.622142  | -0.031190 |
| H       | 5.790204  | -0.384380 | 0.052253  |
| S       | -4.240940 | 1.691122  | 0.091988  |
| S       | 5.188886  | 4.952774  | -0.246057 |
| C       | -2.077433 | -3.808803 | 0.223358  |
| H       | -3.158966 | -3.828825 | 1.959612  |
| H       | -3.411825 | -3.699596 | -1.321586 |
| H       | -1.059726 | -5.577277 | 0.071802  |
| O       | 9.066054  | -1.817268 | -0.183765 |
| H       | 10.088441 | -0.323861 | -0.216786 |
| H       | 9.667729  | -2.844406 | -1.516834 |
| O       | -0.891775 | 8.007588  | -0.180359 |
| H       | -2.415533 | 8.352410  | 0.713916  |
| H       | 0.367907  | 9.081081  | 0.465457  |
| O       | 11.228186 | 3.038869  | -0.574099 |
| H       | 9.730090  | 3.836497  | -1.159235 |
| H       | 11.540590 | 3.825949  | 1.008870  |
| O       | -5.681532 | 7.717789  | 2.242971  |



|         |           |           |           |
|---------|-----------|-----------|-----------|
| H       | -7.031457 | 8.070145  | 1.125315  |
| H       | -5.449740 | 5.945674  | 2.150214  |
| point04 |           |           |           |
| C       | -0.280963 | -1.625421 | 0.176487  |
| C       | -1.190354 | 0.974702  | 0.119695  |
| C       | 3.158322  | 2.434292  | 0.114516  |
| C       | 2.248188  | -1.972088 | 0.182128  |
| N       | 0.604593  | 2.804252  | 0.083677  |
| N       | 3.926586  | -0.005854 | 0.149887  |
| H       | 3.096981  | -3.807515 | 0.221251  |
| H       | 0.023518  | 4.625857  | -0.016548 |
| H       | 5.779852  | -0.411220 | 0.084992  |
| S       | -4.246806 | 1.709926  | 0.075621  |
| S       | 5.209519  | 4.932831  | -0.281214 |
| C       | -2.102313 | -3.798915 | 0.224488  |
| H       | -3.190763 | -3.816661 | 1.956758  |
| H       | -3.430212 | -3.685181 | -1.325700 |
| H       | -1.091646 | -5.571954 | 0.076521  |
| O       | 9.082634  | -1.795211 | -0.178326 |
| H       | 10.100320 | -0.301544 | -0.234472 |
| H       | 9.687517  | -2.842702 | -1.492904 |
| O       | -0.887909 | 8.029728  | -0.166606 |
| H       | -2.429938 | 8.347595  | 0.703322  |
| H       | 0.332654  | 9.137300  | 0.488424  |
| O       | 11.260122 | 3.067403  | -0.610759 |
| H       | 9.829225  | 3.878011  | -1.330719 |
| H       | 11.451693 | 3.887269  | 0.974802  |
| O       | -5.687709 | 7.725420  | 2.241013  |
| H       | -7.038909 | 8.048920  | 1.117274  |
| H       | -5.460018 | 5.953531  | 2.196364  |

point05

|   |           |           |           |
|---|-----------|-----------|-----------|
| C | -0.297139 | -1.622988 | 0.186183  |
| C | -1.195335 | 0.982758  | 0.124318  |
| C | 3.155368  | 2.423691  | 0.155838  |
| C | 2.229726  | -1.980013 | 0.201263  |
| N | 0.600774  | 2.807368  | 0.098341  |
| N | 3.919570  | -0.025443 | 0.179692  |
| H | 3.066024  | -3.820646 | 0.240199  |
| H | 0.026946  | 4.629570  | -0.001909 |
| H | 5.769498  | -0.438057 | 0.117734  |
| S | -4.252672 | 1.728733  | 0.059256  |
| S | 5.230155  | 4.912889  | -0.316372 |
| C | -2.127191 | -3.789024 | 0.225618  |
| H | -3.222559 | -3.804497 | 1.953907  |
| H | -3.448599 | -3.670763 | -1.329813 |
| H | -1.123567 | -5.566632 | 0.081241  |
| O | 9.099215  | -1.773155 | -0.172885 |
| H | 10.112198 | -0.279226 | -0.252157 |
| H | 9.707302  | -2.840995 | -1.468975 |
| O | -0.884042 | 8.051870  | -0.152851 |
| H | -2.444342 | 8.342780  | 0.692728  |
| H | 0.297399  | 9.193519  | 0.511392  |
| O | 11.291869 | 3.095938  | -0.647420 |
| H | 9.940472  | 3.914218  | -1.500082 |
| H | 11.360021 | 3.944765  | 0.933001  |
| O | -5.693885 | 7.733052  | 2.239055  |
| H | -7.046360 | 8.027695  | 1.109233  |
| H | -5.470294 | 5.961387  | 2.242513  |

point06

|   |           |           |          |
|---|-----------|-----------|----------|
| C | -0.313315 | -1.620554 | 0.195880 |
|---|-----------|-----------|----------|

|         |           |           |           |
|---------|-----------|-----------|-----------|
| C       | -1.200316 | 0.990814  | 0.128942  |
| C       | 3.152415  | 2.413091  | 0.197159  |
| C       | 2.211263  | -1.987941 | 0.220399  |
| N       | 0.596955  | 2.810482  | 0.113006  |
| N       | 3.912553  | -0.045034 | 0.209497  |
| H       | 3.035065  | -3.833780 | 0.259146  |
| H       | 0.030375  | 4.633285  | 0.012733  |
| H       | 5.759146  | -0.464897 | 0.150473  |
| S       | -4.258538 | 1.747537  | 0.042889  |
| S       | 5.250789  | 4.892947  | -0.351529 |
| C       | -2.152069 | -3.779133 | 0.226748  |
| H       | -3.254356 | -3.792333 | 1.951053  |
| H       | -3.466986 | -3.656348 | -1.333926 |
| H       | -1.155486 | -5.561309 | 0.085962  |
| O       | 9.115795  | -1.751098 | -0.167447 |
| H       | 10.124075 | -0.256910 | -0.269842 |
| H       | 9.727087  | -2.839289 | -1.445045 |
| O       | -0.880174 | 8.074010  | -0.139095 |
| H       | -2.458747 | 8.337965  | 0.682134  |
| H       | 0.262145  | 9.249739  | 0.534360  |
| O       | 11.323806 | 3.124284  | -0.683892 |
| H       | 10.062871 | 3.944063  | -1.664144 |
| H       | 11.267169 | 3.998260  | 0.883220  |
| O       | -5.700060 | 7.740683  | 2.237099  |
| H       | -7.053811 | 8.006469  | 1.101193  |
| H       | -5.480572 | 5.969242  | 2.288664  |
| point07 |           |           |           |
| C       | -0.329491 | -1.618120 | 0.205576  |
| C       | -1.205298 | 0.998870  | 0.133564  |
| C       | 3.149461  | 2.402490  | 0.238480  |

|         |           |           |           |
|---------|-----------|-----------|-----------|
| C       | 2.192802  | -1.995866 | 0.239534  |
| N       | 0.593136  | 2.813598  | 0.127670  |
| N       | 3.905535  | -0.064623 | 0.239304  |
| H       | 3.004105  | -3.846914 | 0.278094  |
| H       | 0.033805  | 4.637001  | 0.027375  |
| H       | 5.748793  | -0.491735 | 0.183213  |
| S       | -4.264403 | 1.766342  | 0.026522  |
| S       | 5.271423  | 4.873005  | -0.386685 |
| C       | -2.176947 | -3.769242 | 0.227878  |
| H       | -3.286152 | -3.780168 | 1.948202  |
| H       | -3.485373 | -3.641929 | -1.338039 |
| H       | -1.187406 | -5.555988 | 0.090682  |
| O       | 9.132376  | -1.729041 | -0.162008 |
| H       | 10.135954 | -0.234592 | -0.287527 |
| H       | 9.746875  | -2.837584 | -1.421116 |
| O       | -0.876308 | 8.096150  | -0.125340 |
| H       | -2.473151 | 8.333148  | 0.671541  |
| H       | 0.226890  | 9.305958  | 0.557329  |
| O       | 11.355553 | 3.152819  | -0.720553 |
| H       | 10.194026 | 3.967777  | -1.820364 |
| H       | 11.175411 | 4.047198  | 0.825578  |
| O       | -5.706236 | 7.748316  | 2.235142  |
| H       | -7.061262 | 7.985244  | 1.093154  |
| H       | -5.490849 | 5.977098  | 2.334815  |
| point08 |           |           |           |
| C       | -0.345665 | -1.615686 | 0.215272  |
| C       | -1.210279 | 1.006925  | 0.138188  |
| C       | 3.146507  | 2.391891  | 0.279802  |
| C       | 2.174338  | -2.003794 | 0.258669  |
| N       | 0.589315  | 2.816714  | 0.142334  |

|   |           |           |           |
|---|-----------|-----------|-----------|
| N | 3.898518  | -0.084212 | 0.269108  |
| H | 2.973148  | -3.860045 | 0.297042  |
| H | 0.037235  | 4.640714  | 0.042014  |
| H | 5.738441  | -0.518575 | 0.215954  |
| S | -4.270269 | 1.785149  | 0.010155  |
| S | 5.292059  | 4.853062  | -0.421842 |
| C | -2.201826 | -3.759349 | 0.229008  |
| H | -3.317949 | -3.768004 | 1.945350  |
| H | -3.503758 | -3.627514 | -1.342153 |
| H | -1.219327 | -5.550664 | 0.095403  |
| O | 9.148956  | -1.706986 | -0.156569 |
| H | 10.147833 | -0.212275 | -0.305213 |
| H | 9.766660  | -2.835878 | -1.397186 |
| O | -0.872441 | 8.118290  | -0.111586 |
| H | -2.487556 | 8.328333  | 0.660947  |
| H | 0.191635  | 9.362178  | 0.580297  |
| O | 11.387490 | 3.181354  | -0.757213 |
| H | 10.331520 | 3.985771  | -1.965818 |
| H | 11.086180 | 4.091348  | 0.760683  |
| O | -5.712412 | 7.755946  | 2.233184  |
| H | -7.068713 | 7.964018  | 1.085113  |
| H | -5.501127 | 5.984955  | 2.380966  |

point09

|   |           |           |          |
|---|-----------|-----------|----------|
| C | -0.361841 | -1.613252 | 0.224968 |
| C | -1.215260 | 1.014981  | 0.142812 |
| C | 3.143554  | 2.381289  | 0.321123 |
| C | 2.155875  | -2.011719 | 0.277805 |
| N | 0.585496  | 2.819829  | 0.157000 |
| N | 3.891500  | -0.103801 | 0.298913 |
| H | 2.942188  | -3.873179 | 0.315991 |

|         |           |           |           |
|---------|-----------|-----------|-----------|
| H       | 0.040665  | 4.644429  | 0.056656  |
| H       | 5.728089  | -0.545413 | 0.248694  |
| S       | -4.276135 | 1.803953  | -0.006212 |
| S       | 5.312693  | 4.833120  | -0.456998 |
| C       | -2.226704 | -3.749459 | 0.230138  |
| H       | -3.349746 | -3.755840 | 1.942497  |
| H       | -3.522145 | -3.613096 | -1.346267 |
| H       | -1.251246 | -5.545343 | 0.100121  |
| O       | 9.165536  | -1.684929 | -0.151131 |
| H       | 10.159710 | -0.189957 | -0.322899 |
| H       | 9.786448  | -2.834172 | -1.373256 |
| O       | -0.868573 | 8.140430  | -0.097831 |
| H       | -2.501960 | 8.323518  | 0.650353  |
| H       | 0.156382  | 9.418399  | 0.603265  |
| O       | 11.419237 | 3.209700  | -0.793874 |
| H       | 10.472811 | 3.998645  | -2.099527 |
| H       | 11.001464 | 4.130921  | 0.689264  |
| O       | -5.718587 | 7.763577  | 2.231226  |
| H       | -7.076165 | 7.942793  | 1.077072  |
| H       | -5.511405 | 5.992811  | 2.427117  |
| point10 |           |           |           |
| C       | -0.378017 | -1.610818 | 0.234664  |
| C       | -1.220242 | 1.023037  | 0.147435  |
| C       | 3.140600  | 2.370690  | 0.362446  |
| C       | 2.137414  | -2.019647 | 0.296940  |
| N       | 0.581677  | 2.822945  | 0.171665  |
| N       | 3.884483  | -0.123390 | 0.328718  |
| H       | 2.911229  | -3.886312 | 0.334939  |
| H       | 0.044095  | 4.648144  | 0.071296  |
| H       | 5.717735  | -0.572253 | 0.281433  |

|   |           |           |           |
|---|-----------|-----------|-----------|
| S | -4.282000 | 1.822758  | -0.022578 |
| S | 5.333329  | 4.813180  | -0.492155 |
| C | -2.251582 | -3.739568 | 0.231268  |
| H | -3.381542 | -3.743676 | 1.939645  |
| H | -3.540532 | -3.598681 | -1.350379 |
| H | -1.283168 | -5.540019 | 0.104842  |
| O | 9.182117  | -1.662872 | -0.145690 |
| H | 10.171589 | -0.167639 | -0.340585 |
| H | 9.806233  | -2.832467 | -1.349327 |
| O | -0.864707 | 8.162570  | -0.084076 |
| H | -2.516365 | 8.318703  | 0.639759  |
| H | 0.121128  | 9.474618  | 0.626233  |
| O | 11.451128 | 3.238212  | -0.830546 |
| H | 10.615416 | 4.006737  | -2.219549 |
| H | 10.923518 | 4.164110  | 0.609333  |
| O | -5.724765 | 7.771210  | 2.229268  |
| H | -7.083616 | 7.921568  | 1.069031  |
| H | -5.521681 | 6.000667  | 2.473266  |

${}^1\Pi_{7\Pi_8}^*$  to  ${}^1n_{8\Pi_8}^*$

point01

|   |           |           |          |
|---|-----------|-----------|----------|
| C | -0.413850 | -1.625164 | 0.221098 |
| C | -1.349264 | 0.865495  | 0.158737 |
| C | 3.006554  | 2.299797  | 0.130391 |
| C | 2.165626  | -2.099486 | 0.249444 |
| N | 0.583925  | 2.787346  | 0.122832 |
| N | 3.851264  | -0.062361 | 0.207870 |
| H | 3.014113  | -3.930632 | 0.326923 |
| H | 0.028346  | 4.616603  | 0.032125 |
| H | 5.723982  | -0.410071 | 0.126612 |
| S | -4.416292 | 1.848152  | 0.015118 |

|   |           |           |           |
|---|-----------|-----------|-----------|
| S | 5.230764  | 4.796127  | -0.009449 |
| C | -2.237436 | -3.800241 | 0.258892  |
| H | -3.276787 | -3.830477 | 2.020117  |
| H | -3.607489 | -3.609377 | -1.243440 |
| H | -1.252888 | -5.584143 | 0.045353  |
| O | 9.063128  | -1.475876 | -0.274010 |
| H | 10.070354 | -0.001890 | -0.548021 |
| H | 9.562016  | -2.666404 | -1.513671 |
| O | -0.784236 | 8.088030  | -0.090707 |
| H | -2.501997 | 8.112596  | 0.489439  |
| H | 0.041574  | 9.410838  | 0.786126  |
| O | 11.563238 | 3.240880  | -1.082813 |
| H | 10.650500 | 4.533455  | -0.245664 |
| H | 13.292337 | 3.518670  | -0.716206 |
| O | -5.587922 | 7.568355  | 2.158067  |
| H | -7.014665 | 7.823468  | 1.105490  |
| H | -5.295014 | 5.782564  | 2.082478  |

point02

|   |           |           |           |
|---|-----------|-----------|-----------|
| C | -0.398487 | -1.622800 | 0.214153  |
| C | -1.327039 | 0.864550  | 0.154345  |
| C | 3.024044  | 2.315823  | 0.115568  |
| C | 2.182647  | -2.088873 | 0.236427  |
| N | 0.590307  | 2.788191  | 0.114710  |
| N | 3.864414  | -0.049112 | 0.191754  |
| H | 3.033759  | -3.919439 | 0.309475  |
| H | 0.031471  | 4.614961  | 0.023399  |
| H | 5.737112  | -0.399658 | 0.110927  |
| S | -4.414808 | 1.821991  | 0.028136  |
| S | 5.225934  | 4.816027  | -0.027779 |
| C | -2.218002 | -3.800714 | 0.256094  |



|         |           |           |           |
|---------|-----------|-----------|-----------|
| H       | -3.260309 | -3.829868 | 2.015629  |
| H       | -3.585513 | -3.620037 | -1.250029 |
| H       | -1.228515 | -5.581943 | 0.049044  |
| O       | 9.061055  | -1.516250 | -0.262814 |
| H       | 10.071515 | -0.040434 | -0.503824 |
| H       | 9.571236  | -2.685373 | -1.515715 |
| O       | -0.796873 | 8.073218  | -0.102115 |
| H       | -2.491944 | 8.137123  | 0.513509  |
| H       | 0.081275  | 9.365286  | 0.749972  |
| O       | 11.524117 | 3.214235  | -1.014405 |
| H       | 10.502489 | 4.491316  | -0.283192 |
| H       | 13.202846 | 3.555382  | -0.490174 |
| O       | -5.595768 | 7.576876  | 2.165717  |
| H       | -7.016810 | 7.847624  | 1.110613  |
| H       | -5.308632 | 5.792963  | 2.079602  |
| point03 |           |           |           |
| C       | -0.383123 | -1.620436 | 0.207208  |
| C       | -1.304814 | 0.863607  | 0.149954  |
| C       | 3.041533  | 2.331848  | 0.100745  |
| C       | 2.199668  | -2.078260 | 0.223411  |
| N       | 0.596687  | 2.789034  | 0.106590  |
| N       | 3.877565  | -0.035863 | 0.175639  |
| H       | 3.053402  | -3.908248 | 0.292027  |
| H       | 0.034599  | 4.613320  | 0.014672  |
| H       | 5.750242  | -0.389248 | 0.095242  |
| S       | -4.413327 | 1.795828  | 0.041154  |
| S       | 5.221104  | 4.835928  | -0.046109 |
| C       | -2.198566 | -3.801188 | 0.253295  |
| H       | -3.243830 | -3.829258 | 2.011139  |
| H       | -3.563540 | -3.630693 | -1.256619 |

|   |           |           |           |
|---|-----------|-----------|-----------|
| H | -1.204141 | -5.579743 | 0.052733  |
| O | 9.058980  | -1.556624 | -0.251619 |
| H | 10.072677 | -0.078977 | -0.459629 |
| H | 9.580454  | -2.704342 | -1.517758 |
| O | -0.809508 | 8.058406  | -0.113523 |
| H | -2.481889 | 8.161648  | 0.537576  |
| H | 0.120976  | 9.319732  | 0.713816  |
| O | 11.484999 | 3.187590  | -0.945997 |
| H | 10.356973 | 4.437190  | -0.333312 |
| H | 13.087688 | 3.593477  | -0.256090 |
| O | -5.603616 | 7.585395  | 2.173366  |
| H | -7.018955 | 7.871779  | 1.115736  |
| H | -5.322247 | 5.803360  | 2.076724  |

point04

|   |           |           |           |
|---|-----------|-----------|-----------|
| C | -0.367760 | -1.618072 | 0.200264  |
| C | -1.282589 | 0.862662  | 0.145562  |
| C | 3.059023  | 2.347875  | 0.085922  |
| C | 2.216688  | -2.067648 | 0.210396  |
| N | 0.603066  | 2.789876  | 0.098468  |
| N | 3.890716  | -0.022616 | 0.159523  |
| H | 3.073046  | -3.897056 | 0.274579  |
| H | 0.037725  | 4.611680  | 0.005945  |
| H | 5.763372  | -0.378835 | 0.079559  |
| S | -4.411845 | 1.769666  | 0.054173  |
| S | 5.216275  | 4.855829  | -0.064442 |
| C | -2.179132 | -3.801660 | 0.250496  |
| H | -3.227354 | -3.828649 | 2.006651  |
| H | -3.541564 | -3.641353 | -1.263208 |
| H | -1.179767 | -5.577544 | 0.056423  |
| O | 9.056906  | -1.596998 | -0.240422 |

|   |           |           |           |
|---|-----------|-----------|-----------|
| H | 10.073837 | -0.117522 | -0.415432 |
| H | 9.589674  | -2.723311 | -1.519801 |
| O | -0.822144 | 8.043597  | -0.124932 |
| H | -2.471835 | 8.186173  | 0.561646  |
| H | 0.160678  | 9.274181  | 0.677661  |
| O | 11.445693 | 3.160945  | -0.877589 |
| H | 10.216424 | 4.371054  | -0.393993 |
| H | 12.946293 | 3.631050  | -0.019373 |
| O | -5.611462 | 7.593915  | 2.181014  |
| H | -7.021100 | 7.895935  | 1.120859  |
| H | -5.335865 | 5.813759  | 2.073848  |

point05

|   |           |           |           |
|---|-----------|-----------|-----------|
| C | -0.352396 | -1.615708 | 0.193321  |
| C | -1.260364 | 0.861719  | 0.141170  |
| C | 3.076512  | 2.363900  | 0.071099  |
| C | 2.233709  | -2.057035 | 0.197380  |
| N | 0.609448  | 2.790719  | 0.090346  |
| N | 3.903866  | -0.009367 | 0.143408  |
| H | 3.092690  | -3.885865 | 0.257129  |
| H | 0.040852  | 4.610038  | -0.002780 |
| H | 5.776502  | -0.368425 | 0.063875  |
| S | -4.410364 | 1.743503  | 0.067191  |
| S | 5.211445  | 4.875730  | -0.082772 |
| C | -2.159696 | -3.802135 | 0.247698  |
| H | -3.210875 | -3.828041 | 2.002161  |
| H | -3.519590 | -3.652009 | -1.269798 |
| H | -1.155394 | -5.575346 | 0.060114  |
| O | 9.054832  | -1.637372 | -0.229226 |
| H | 10.074999 | -0.156067 | -0.371237 |
| H | 9.598892  | -2.742278 | -1.521844 |

|   |           |          |           |
|---|-----------|----------|-----------|
| O | -0.834779 | 8.028785 | -0.136342 |
| H | -2.461780 | 8.210697 | 0.585713  |
| H | 0.200379  | 9.228627 | 0.641505  |
| O | 11.406576 | 3.134300 | -0.809181 |
| H | 10.084801 | 4.292726 | -0.462350 |
| H | 12.779237 | 3.664566 | 0.212555  |
| O | -5.619310 | 7.602434 | 2.188664  |
| H | -7.023245 | 7.920090 | 1.125982  |
| H | -5.349482 | 5.824159 | 2.070972  |

point06

|   |           |           |           |
|---|-----------|-----------|-----------|
| C | -0.337033 | -1.613344 | 0.186376  |
| C | -1.238137 | 0.860774  | 0.136780  |
| C | 3.094001  | 2.379927  | 0.056276  |
| C | 2.250728  | -2.046420 | 0.184364  |
| N | 0.615828  | 2.791562  | 0.082224  |
| N | 3.917019  | 0.003881  | 0.127292  |
| H | 3.112334  | -3.874672 | 0.239682  |
| H | 0.043978  | 4.608398  | -0.011507 |
| H | 5.789633  | -0.358012 | 0.048190  |
| S | -4.408882 | 1.717342  | 0.080209  |
| S | 5.206615  | 4.895632  | -0.101102 |
| C | -2.140262 | -3.802607 | 0.244897  |
| H | -3.194397 | -3.827432 | 1.997673  |
| H | -3.497615 | -3.662667 | -1.276387 |
| H | -1.131020 | -5.573146 | 0.063805  |
| O | 9.052758  | -1.677744 | -0.218031 |
| H | 10.076160 | -0.194612 | -0.327040 |
| H | 9.608112  | -2.761247 | -1.523888 |
| O | -0.847416 | 8.013973  | -0.147750 |
| H | -2.451725 | 8.235224  | 0.609783  |

|   |           |          |           |
|---|-----------|----------|-----------|
| H | 0.240080  | 9.183073 | 0.605351  |
| O | 11.367459 | 3.107655 | -0.740773 |
| H | 9.964790  | 4.202904 | -0.535142 |
| H | 12.589962 | 3.691215 | 0.431519  |
| O | -5.627157 | 7.610955 | 2.196313  |
| H | -7.025389 | 7.944246 | 1.131107  |
| H | -5.363099 | 5.834556 | 2.068094  |

point07

|   |           |           |           |
|---|-----------|-----------|-----------|
| C | -0.321669 | -1.610980 | 0.179431  |
| C | -1.215912 | 0.859829  | 0.132389  |
| C | 3.111491  | 2.395952  | 0.041453  |
| C | 2.267749  | -2.035808 | 0.171347  |
| N | 0.622209  | 2.792405  | 0.074102  |
| N | 3.930169  | 0.017128  | 0.111176  |
| H | 3.131979  | -3.863481 | 0.222234  |
| H | 0.047105  | 4.606755  | -0.020233 |
| H | 5.802763  | -0.347600 | 0.032505  |
| S | -4.407399 | 1.691178  | 0.093228  |
| S | 5.201787  | 4.915533  | -0.119434 |
| C | -2.120826 | -3.803081 | 0.242098  |
| H | -3.177918 | -3.826824 | 1.993183  |
| H | -3.475641 | -3.673327 | -1.282977 |
| H | -1.106646 | -5.570947 | 0.067493  |
| O | 9.050683  | -1.718118 | -0.206834 |
| H | 10.077322 | -0.233156 | -0.282845 |
| H | 9.617330  | -2.780216 | -1.525931 |
| O | -0.860052 | 7.999162  | -0.159158 |
| H | -2.441672 | 8.259749  | 0.633850  |
| H | 0.279782  | 9.137521  | 0.569195  |
| O | 11.328152 | 3.081009  | -0.672365 |

|   |           |          |           |
|---|-----------|----------|-----------|
| H | 9.858858  | 4.103928 | -0.607987 |
| H | 12.384842 | 3.708272 | 0.631197  |
| O | -5.635005 | 7.619476 | 2.203963  |
| H | -7.027536 | 7.968401 | 1.136230  |
| H | -5.376717 | 5.844955 | 2.065217  |

point08

|   |           |           |           |
|---|-----------|-----------|-----------|
| C | -0.306306 | -1.608616 | 0.172487  |
| C | -1.193687 | 0.858884  | 0.127997  |
| C | 3.128978  | 2.411978  | 0.026630  |
| C | 2.284770  | -2.025195 | 0.158331  |
| N | 0.628589  | 2.793248  | 0.065982  |
| N | 3.943320  | 0.030377  | 0.095061  |
| H | 3.151623  | -3.852288 | 0.204786  |
| H | 0.050231  | 4.605115  | -0.028960 |
| H | 5.815893  | -0.337189 | 0.016820  |
| S | -4.405917 | 1.665015  | 0.106246  |
| S | 5.196957  | 4.935434  | -0.137765 |
| C | -2.101392 | -3.803554 | 0.239300  |
| H | -3.161442 | -3.826215 | 1.988695  |
| H | -3.453665 | -3.683983 | -1.289564 |
| H | -1.082273 | -5.568747 | 0.071184  |
| O | 9.048610  | -1.758492 | -0.195638 |
| H | 10.078482 | -0.271699 | -0.238648 |
| H | 9.626550  | -2.799185 | -1.527974 |
| O | -0.872687 | 7.984350  | -0.170567 |
| H | -2.431616 | 8.284274  | 0.657919  |
| H | 0.319481  | 9.091967  | 0.533041  |
| O | 11.289035 | 3.054364  | -0.603956 |
| H | 9.767900  | 3.997803  | -0.677463 |
| H | 12.172491 | 3.715202  | 0.807469  |

|         |           |           |           |
|---------|-----------|-----------|-----------|
| O       | -5.642851 | 7.627995  | 2.211611  |
| H       | -7.029681 | 7.992557  | 1.141353  |
| H       | -5.390334 | 5.855354  | 2.062339  |
| point09 |           |           |           |
| C       | -0.290942 | -1.606252 | 0.165542  |
| C       | -1.171462 | 0.857941  | 0.123605  |
| C       | 3.146468  | 2.428003  | 0.011807  |
| C       | 2.301790  | -2.014582 | 0.145314  |
| N       | 0.634971  | 2.794092  | 0.057860  |
| N       | 3.956470  | 0.043626  | 0.078945  |
| H       | 3.171267  | -3.841097 | 0.187338  |
| H       | 0.053358  | 4.603473  | -0.037687 |
| H       | 5.829023  | -0.326777 | 0.001138  |
| S       | -4.404436 | 1.638854  | 0.119264  |
| S       | 5.192128  | 4.955334  | -0.156095 |
| C       | -2.081957 | -3.804028 | 0.236501  |
| H       | -3.144963 | -3.825607 | 1.984205  |
| H       | -3.431692 | -3.694643 | -1.296154 |
| H       | -1.057899 | -5.566549 | 0.074875  |
| O       | 9.046535  | -1.798866 | -0.184443 |
| H       | 10.079644 | -0.310244 | -0.194453 |
| H       | 9.635768  | -2.818152 | -1.530017 |
| O       | -0.885323 | 7.969540  | -0.181975 |
| H       | -2.421563 | 8.308799  | 0.681989  |
| H       | 0.359182  | 9.046416  | 0.496885  |
| O       | 11.249918 | 3.027719  | -0.535548 |
| H       | 9.691738  | 3.887751  | -0.739892 |
| H       | 11.961127 | 3.711766  | 0.959639  |
| O       | -5.650699 | 7.636516  | 2.219260  |
| H       | -7.031826 | 8.016711  | 1.146476  |

H -5.403950 5.865753 2.059463

point10

C -0.275579 -1.603888 0.158597

C -1.149237 0.856996 0.119213

C 3.163957 2.444028 -0.003016

C 2.318811 -2.003968 0.132300

N 0.641350 2.794935 0.049738

N 3.969621 0.056875 0.062830

H 3.190910 -3.829904 0.169890

H 0.056484 4.601833 -0.046414

H 5.842153 -0.316365 -0.014547

S -4.402954 1.612690 0.132283

S 5.187298 4.975235 -0.174426

C -2.062523 -3.804501 0.233702

H -3.128485 -3.824998 1.979717

H -3.409718 -3.705299 -1.302743

H -1.033525 -5.564350 0.078563

O 9.044460 -1.839240 -0.173246

H 10.080804 -0.348789 -0.150256

H 9.644988 -2.837121 -1.532061

O -0.897958 7.954728 -0.193383

H -2.411508 8.333326 0.706056

H 0.398883 9.000862 0.460730

O 11.210744 3.001157 -0.467127

H 9.616249 3.782495 -0.795955

H 11.757109 3.699834 1.090160

O -5.658545 7.645034 2.226910

H -7.033971 8.040868 1.151599

H -5.417567 5.876151 2.056585
